# Supplementary material for: miR-34a is a microRNA safeguard for Citrobacter-induced inflammatory colon oncogenesis
Source: eLife. 2018 Dec 13;7:e39479. doi: 10.7554/eLife.39479 (PMC6314783; doi:10.7554/eLife.39479)
Supplement: Figure 8—source data 1. [file elife-39479-fig8-data1.xlsx]

## Sheet: Sheet1
Figure 8-source data 2. Source data for Figure 8. This file contains gene profiling in epithelial cells for Figure 8.
genes	logFC	logCPM	F	PValue	FDR
Fam180a	6.18259	-1.23137	29.6414	4.15199e-05	0.000259929
Irf7	-5.91616	-1.39223	24.0536	0.000128455	0.00069936
1110017F19Rik	-5.8771	-1.39242	23.6142	0.000141332	0.00075572
Lama2	5.76252	-1.52516	21.395	0.000232955	0.00116645
Krt5	5.70413	-1.52522	20.6458	0.000277677	0.00135855
Slc29a4	5.27492	-1.77918	15.0211	0.00118526	0.00486505
Ptgds	4.99953	0.778328	139.377	2.89869e-10	1.30878e-08
Rgag1	4.79153	-2.02028	10.3777	0.0049366	0.0166219
Dsg4	-4.72162	0.57497	94.6825	7.18926e-09	1.6661e-07
Fgf21	4.45209	1.12203	137.455	3.26211e-10	1.43746e-08
E330013P04Rik	4.40746	-1.12175	25.0708	7.5335e-05	0.000438164
Vipr2	4.2839	-1.23157	23.5806	0.000105927	0.000591463
Flrt1	3.98823	0.403179	78.3513	3.23757e-08	5.88777e-07
Islr	3.76713	-1.52551	14.7442	0.00108269	0.00447351
Hfm1	-3.73785	-0.596607	36.6508	7.56639e-06	5.9953e-05
Tmprss11f	-3.6729	0.328435	74.3804	4.85169e-08	8.24926e-07
Mx2	-3.51771	4.57632	909.164	1.13124e-17	1.97495e-14
Plekha6	3.47419	-1.67237	11.3992	0.00312494	0.011191
Mir763	-3.45506	-1.67248	10.9188	0.00367838	0.0128866
Zfp750	3.40204	-1.23162	18.4706	0.000378168	0.00178357
Cth	3.39147	0.749439	84.7628	1.74308e-08	3.51131e-07
Olfr470	-3.31116	-1.77942	9.73834	0.00556521	0.0184154
Col6a4	-3.2815	-0.925206	22.9901	0.000121664	0.000667593
AK086911	3.22905	0.275623	63.1585	1.6848e-07	2.34607e-06
Vrk1	3.1616	-1.83602	8.2735	0.00957858	0.0290278
Ifitm1	-3.14336	-1.31032	14.9747	0.00101084	0.0042111
Agt	3.05546	3.14941	335.636	1.2055e-13	2.33845e-11
Pcdhga12	3.04884	-0.596825	31.5562	1.94356e-05	0.000135975
Sec1	-3.03107	-1.89503	7.30542	0.0139934	0.0401042
Pcdhga8	3.02156	-0.807428	21.5824	0.000170714	0.000889226
Cp	2.98924	2.13259	157.883	9.95559e-11	5.54706e-09
Fibin	2.97243	-1.19388	16.5264	0.000644927	0.00283492
AY512912	2.96671	-1.12224	16.9228	0.000576966	0.00257399
Selenbp1	2.94909	-0.894582	23.1239	0.000117884	0.000649229
AK041614	2.93624	0.221656	55.464	4.39006e-07	5.27362e-06
AK146139	2.87022	0.302233	51.884	7.09786e-07	7.85112e-06
Gbp3	-2.84536	0.248603	43.7945	2.31819e-06	2.1798e-05
Sra1	-2.84498	-0.895167	20.8534	0.000204453	0.00104115
Apol9b	-2.82842	-0.140102	34.4278	1.12899e-05	8.48971e-05
Fbxo39	-2.81958	-1.19449	13.8729	0.00141028	0.00563843
Ppyr1	-2.80014	0.179188	48.0945	1.21346e-06	1.25603e-05
4833427G06Rik	2.78346	1.21435	98.1596	5.36828e-09	1.32624e-07
Inmt	2.76007	0.878289	79.0527	3.01955e-08	5.58829e-07
Atp2a1	2.73819	-0.549202	27.8455	4.11992e-05	0.00025842
Mamdc2	2.70202	-0.289935	30.8546	2.23018e-05	0.000152987
AK146937	2.69777	-0.806956	21.5607	0.000171628	0.000892211
AK133329	2.66517	-1.30959	11.5165	0.00300431	0.0108592
1500017E21Rik	2.6507	-1.30992	9.74352	0.00555487	0.0183904
Gap43	-2.64477	4.13621	501.101	3.00286e-15	1.57275e-12
Oas3	-2.6284	7.1115	586.689	1.75403e-07	2.40816e-06
Acap1	2.57483	-1.72484	6.94592	0.0161824	0.0453723
Serpinb9e	-2.54477	0.326988	50.6375	8.43927e-07	9.19889e-06
1700016C15Rik	2.53397	-1.12237	14.4564	0.00118047	0.00484729
Pthlh	-2.5174	2.31852	177.657	3.57463e-11	2.41576e-09
Isg15	-2.51719	7.93384	995.517	2.01579e-10	9.77566e-09
Vmn2r78	-2.51642	0.178709	44.3424	2.12936e-06	2.02958e-05
Mmp3	2.51229	-0.140067	29.6301	2.84926e-05	0.00018878
2010016I18Rik	2.50992	-0.597089	19.619	0.000279748	0.00136805
Cmpk2	-2.50849	5.20307	546.183	3.84849e-13	5.75899e-11
Cps1	2.5058	1.58635	100.482	4.4381e-09	1.14505e-07
Fam119a	2.49138	-1.19386	11.8973	0.00264705	0.00976676
Ifi27l2a	-2.48708	5.95312	129.865	0.000959942	0.0040286
AK052812	-2.47824	-1.72498	6.98102	0.0159526	0.0448358
Micalcl	-2.44592	-1.72507	6.73915	0.0176144	0.0488253
Zbp1	-2.43269	3.37152	225.062	1.11007e-11	9.53112e-10
BC024582	2.4264	-0.987842	12.6961	0.00204116	0.00780466
Efemp1	2.41834	-0.835375	17.5164	0.000489555	0.00223155
Prelp	2.41233	3.81648	341.946	1.01693e-13	2.04852e-11
Hsh2d	-2.41116	-0.231124	28.8496	3.34204e-05	0.000215832
Oasl2	-2.40828	4.58741	614.733	4.47056e-16	3.60224e-13
Hrc	2.40095	-0.807403	16.143	0.000719207	0.00311567
Podxl	2.39987	0.797413	63.3418	1.64865e-07	2.31429e-06
Crabp2	2.39928	1.15804	81.0862	2.47393e-08	4.74374e-07
Evpl	2.39877	-1.47947	9.43235	0.00621617	0.0202093
Tnfsf18	2.39345	-0.269855	29.5427	2.90025e-05	0.000191552
Igsf11	-2.3914	1.99339	137.436	3.26603e-10	1.43746e-08
Leprel1	2.39098	-1.47961	8.52602	0.00870085	0.0268221
Ces1d	2.37854	0.729516	53.1685	5.95735e-07	6.73174e-06
Mettl7b	2.36551	-1.02009	14.3369	0.00122393	0.00498858
mKIAA1376	2.35461	-0.72417	16.2823	0.000691178	0.00301169
AK044300	-2.35417	-0.231562	24.6286	8.32445e-05	0.00047885
Slc38a10	-2.3461	-1.52576	7.31481	0.0139409	0.0400194
AK016028	2.34274	-1.05325	13.9348	0.0013837	0.00554275
Pcdhga2	2.3127	-1.48	7.64908	0.0122073	0.0357481
Exph5	2.31179	0.249575	39.6946	4.48916e-06	3.81835e-05
AK144143	2.31008	2.01746	133.754	4.11246e-10	1.73004e-08
Clca4	-2.28767	0.648616	49.8018	9.49469e-07	1.01798e-05
AK043693	2.28271	-1.30969	10.6556	0.00402748	0.0139188
Kif5a	2.28136	-1.52553	7.70058	0.0119623	0.0351388
Pcdhga10	2.27715	-1.83597	5.38528	0.0314295	0.0785362
H2-T24	-2.26465	2.44795	152.365	1.35256e-10	7.04877e-09
Ptprv	2.26091	0.587085	49.6595	9.6885e-07	1.02928e-05
Thsd7a	2.25933	-1.52554	7.2791	0.0141418	0.0404743
Cela1	-2.25779	0.796622	40.7152	4.11903e-06	3.5541e-05
Gna15	2.25535	-1.83591	5.3702	0.0316409	0.0790079
AK010245	2.24339	-0.329531	23.4652	0.000108816	0.000605017
Arhgap27	-2.24252	-1.52574	7.99414	0.0106669	0.0318609
Apol9a	-2.24188	-1.27054	10.3846	0.00442568	0.015108
Oasl1	-2.2399	0.597248	49.3834	1.00772e-06	1.0641e-05
Oas1a	-2.23805	6.95456	1143.36	7.31501e-18	1.91562e-14
Glt8d2	2.23069	4.07505	204.656	1.3244e-08	2.77462e-07
Igtp	-2.22664	1.37951	74.2394	4.92344e-08	8.31823e-07
Nipal1	-2.19158	3.92012	400.559	2.38246e-14	5.94197e-12
Usp18	-2.18266	6.97186	135.637	0.00137801	0.00552841
Oas2	-2.174	-0.77939	15.4195	0.000886655	0.00375565
Scara5	2.16322	2.07505	119.834	1.03686e-09	3.63249e-08
Stard8	2.15233	-1.62179	6.29916	0.021162	0.0568099
Dhx58	-2.14466	4.66428	431.32	1.20428e-14	3.71025e-12
Sbsn	-2.14331	0.40257	39.6608	4.51461e-06	3.8354e-05
AK040452	-2.13728	-1.35031	8.85259	0.00769617	0.0241081
Slc22a14	2.13501	0.921975	47.5893	1.30642e-06	1.33121e-05
Svop	2.13338	-0.434815	19.4544	0.000291926	0.00141965
Slc39a10	-2.12122	4.75206	466.476	5.83405e-15	2.2169e-12
AK007376	2.11543	-0.98766	11.7519	0.00277751	0.0101693
Parp9	-2.10966	-0.230972	19.6845	0.000275059	0.00134826
Glod5	-2.1001	0.795153	43.7984	2.31678e-06	2.1798e-05
Mlyk	2.09895	-1.35066	6.21374	0.0219404	0.0585096
Nfxl1	2.09027	-1.02015	11.1198	0.00343462	0.0121628
Dennd1c	2.07952	-1.43534	7.28426	0.0141126	0.0404127
Aldh5a1	-2.07648	-0.457787	17.631	0.000474421	0.00216822
Acat3	2.06637	1.63667	4.00179	0.153157	0.276227
Padi1	2.06042	1.29557	68.3495	9.2835e-08	1.42697e-06
Abcc6	2.0578	-1.43556	5.69016	0.0276223	0.0707269
Zbtb8b	2.05752	-0.370547	20.7249	0.000211134	0.00107101
Slc11a1	-2.05544	-1.23209	6.81465	0.0172341	0.0479999
Acot12	2.05166	-1.19435	9.52167	0.00601777	0.0196926
Ret	2.05154	0.415292	32.7584	1.54238e-05	0.0001115
Gm129	2.05084	1.6512	73.2555	5.45798e-08	9.06661e-07
Fat2	2.04171	-0.122123	25.2861	7.17875e-05	0.000419629
Ifi44	-2.03347	7.9222	600.226	1.26659e-08	2.68574e-07
Dpys	2.03226	-0.548809	12.1019	0.00264984	0.00977362
Rft1	2.03222	-1.67219	5.25319	0.0333368	0.0825278
Slc5a8	2.0288	-1.23144	8.17907	0.00993191	0.0299214
Arid5a	2.02673	0.341072	35.8271	8.75875e-06	6.82596e-05
Rtp4	-2.02241	6.39269	914.374	1.07185e-17	1.97495e-14
AK085274	2.02161	-0.751572	14.9517	0.00101776	0.00423224
Sema3d	2.00947	-0.925201	10.9338	0.00365953	0.0128335
Siglecg	-2.00811	2.6896	146.991	1.8406e-10	9.1811e-09
D14Ertd668e	-2.00197	0.207864	29.0352	3.21685e-05	0.000209165
2810433D01Rik	1.9922	-0.779122	13.8407	0.00142434	0.00568598
AK036462	-1.98898	-0.212474	22.3	0.000143423	0.00076417
Ccl5	-1.98862	1.78564	86.0535	1.54603e-08	3.18166e-07
Tprg	1.98671	0.887063	50.0447	9.17367e-07	9.87608e-06
Parp11	-1.98428	-0.865303	12.1332	0.00244953	0.00913125
Stxbp3a	1.98356	-1.43536	7.20674	0.0145592	0.0413973
Fance	-1.97675	-1.43518	7.17096	0.0147706	0.0419075
BC025446	1.97328	-0.524919	16.5948	0.000632595	0.00278656
Tmem132c	1.9717	-0.956084	11.6102	0.00291161	0.01059
Aff4	1.97004	0.474798	37.1246	6.96264e-06	5.56321e-05
Rnf183	-1.96838	2.86876	152.909	1.31173e-10	6.87019e-09
Esm1	-1.96445	8.01209	1545.81	7.38832e-20	4.06985e-16
Abca4	1.96337	-0.350516	19.213	0.000310862	0.00149921
Ryr1	1.96235	-1.05369	9.32738	0.00645872	0.0208234
Elfn1	-1.95946	-1.67244	4.86537	0.0397429	0.095491
AK165607	1.95882	-0.103229	20.1846	0.000241992	0.0012065
abParts	1.95393	-0.647234	14.3531	0.00121794	0.00497387
Ubash3b	-1.94951	-1.23241	7.99728	0.010654	0.0318403
Bst2	-1.94613	9.12652	429.987	3.13332e-06	2.827e-05
Chka	1.94022	3.01077	131.759	8.42718e-10	3.06407e-08
Rcor2	-1.93278	-1.02114	9.87972	0.00529043	0.0176376
AK132723	-1.92816	-1.72428	3.78634	0.0664178	0.144424
AK045535	1.92382	2.02139	101.308	4.15164e-09	1.07689e-07
Xaf1	-1.92336	2.49586	130.42	5.09129e-10	2.05912e-08
Oas1b	-1.92311	3.43556	195.581	1.53899e-11	1.22128e-09
Ctdspl2	-1.91949	-1.67245	4.82596	0.0404689	0.0968941
Pars2	-1.91617	-0.371678	15.285	0.000922315	0.00388443
Ppl	1.91586	-1.72491	4.50815	0.0469097	0.10905
Neat1	1.91554	1.80125	79.6791	2.8385e-08	5.35735e-07
Ostn	1.90755	3.222	158.803	9.46853e-11	5.36124e-09
Serpinb9f	-1.90039	-1.08799	7.40951	0.0134232	0.0387832
Egr1	1.89801	8.43112	1537.63	7.77059e-20	4.06985e-16
Ppapdc1b	-1.88285	-1.47957	5.14727	0.0349616	0.0858066
BC054394	-1.88137	-1.47992	5.6459	0.0280178	0.0715298
AK136276	1.87737	-1.15757	6.96371	0.0160654	0.0450926
Ddx26b	1.87333	0.738146	24.9118	0.000111052	0.000615813
Magt1	1.87284	2.41106	125.962	6.8257e-10	2.6367e-08
Gm600	1.87065	-0.807752	7.57187	0.0140495	0.0402429
2610318N02Rik	-1.85986	-0.67279	13.5059	0.00158012	0.0062178
Pde8a	1.85687	-1.77911	3.86845	0.0637821	0.139774
Snx20	1.85433	0.135015	26.3333	5.69717e-05	0.000343766
Gpr179	1.85052	0.23512	12.7486	0.00458391	0.0155898
Oas1d	-1.84874	-0.98778	10.217	0.00469392	0.0159225
Amt	1.8438	-1.15749	7.77536	0.0116163	0.0342281
Plaur	-1.83373	0.638841	35.2113	9.78587e-06	7.49803e-05
Slc1a1	1.8322	-1.02061	7.40027	0.0134727	0.0388603
Tmem86a	1.83015	6.07076	46.9998	0.0102932	0.0308822
AK163711	1.83008	1.90138	81.9751	2.27045e-08	4.39611e-07
Rab43	-1.82765	-1.52557	5.84348	0.02571	0.0666449
U90926	1.82489	-1.1944	7.95484	0.0108309	0.0322862
C3ar1	-1.82004	0.105217	22.7268	0.000129504	0.00070288
Hoxb9	1.81698	1.25604	55.6635	4.27705e-07	5.14375e-06
AK079017	1.81568	-1.77932	3.9385	0.0616291	0.136138
Serpinb7	1.81153	2.29317	102.133	3.8856e-09	1.02782e-07
Col14a1	1.808	-1.57302	4.94163	0.0383797	0.0928042
Ggh	-1.80446	-1.02052	9.41183	0.00626278	0.0203167
Pou5f2	-1.78411	-1.52564	4.69064	0.0430792	0.101979
Prkag3	-1.78268	-0.479483	15.1727	0.000953317	0.0040024
Plcl1	1.78182	0.23541	21.6702	0.000167085	0.000872927
Stat1	-1.78162	1.71144	72.1494	6.13677e-08	1.00442e-06
AK015324	-1.77799	-0.176278	16.3101	0.000685725	0.00299166
Hif1a	1.76773	-1.19437	7.48398	0.0130313	0.0378543
5430407P10Rik	-1.76485	-0.435014	15.47	0.000873653	0.00371108
BC038927	-1.76468	2.97049	145.87	1.96528e-10	9.62297e-09
Pnma5	1.76421	0.163899	21.2524	0.000185157	0.000954958
mKIAA1281	1.76179	-1.15816	7.48552	0.0130233	0.0378416
AK146690	-1.76169	-1.02033	8.41419	0.00907794	0.0278045
Upp1	-1.75408	-0.895049	7.95123	0.0108461	0.0323222
AK015279	1.75341	0.163984	22.597	0.000133571	0.000720472
Zfp653	1.75173	-1.57294	4.52516	0.0465367	0.108351
Igsf3	-1.7469	2.01873	71.4897	6.58565e-08	1.07119e-06
Acrbp	1.74504	-1.39216	5.7794	0.0264341	0.0682545
Sgtb	1.74317	4.62586	200.971	3.62484e-09	9.76099e-08
Ces1a	1.7408	1.18626	47.9911	1.23189e-06	1.27008e-05
Pik3r5	-1.7388	1.5418	59.3233	2.68329e-07	3.46151e-06
Phf11	-1.73542	2.04725	77.457	3.54112e-08	6.30797e-07
Tcfcp2l1	1.72965	0.748522	29.8739	2.71228e-05	0.000181347
Csprs	-1.72824	2.19324	89.7768	1.10274e-08	2.39156e-07
Tacc2	1.72581	-0.672353	11.9482	0.00260298	0.0096245
Ifit1	-1.72515	6.01034	205.577	1.82976e-06	1.76978e-05
Fbxo30	-1.72246	-1.57286	4.99467	0.0374631	0.0910712
Fam46d	-1.71141	-0.672759	11.8303	0.0027063	0.00996083
AK038627	-1.70745	-0.139869	18.7291	0.000353059	0.00167647
Col18a1	1.70576	-0.157297	18.1286	0.000414485	0.00193051
Cdhr2	1.70044	-1.43518	5.02838	0.0368934	0.0898949
mPHLL2	1.69746	-1.08736	5.78875	0.0265202	0.0683901
Tgtp2	-1.69586	3.24809	162.928	7.58596e-11	4.46421e-09
Tmprss11e	-1.69508	1.92102	72.9806	5.61856e-08	9.2977e-07
Crbn	1.69406	-0.502487	13.9295	0.00138595	0.00554963
4833403I15Rik	1.69191	-1.19454	6.92334	0.0163322	0.0457433
Ogt	1.68868	1.69994	53.5453	5.66232e-07	6.45467e-06
Cdx2	-1.68225	0.103966	20.1171	0.000246189	0.00122278
Efna3	-1.67543	1.13337	33.8951	1.2458e-05	9.23551e-05
S100a7a	-1.67491	5.10294	431.458	1.20073e-14	3.71025e-12
Csf2	1.67439	-1.43539	4.86189	0.0398063	0.0955652
Sema7a	1.67284	-0.894569	9.02616	0.00721543	0.0228137
Dram1	-1.67155	1.39165	36.6693	8.78746e-06	6.83868e-05
Ip6k3	1.66962	-0.987734	8.67514	0.00822494	0.0255051
Zfp426	1.66708	-0.270808	12.5354	0.00214943	0.00816528
AK139053	1.66692	-0.955967	8.14796	0.0100515	0.0302555
Slc12a5	1.66335	-0.75117	9.40729	0.00627313	0.0203314
Osbpl7	-1.66045	-0.480944	9.43946	0.00636992	0.0205982
2700099C18Rik	1.6597	-1.08749	6.65772	0.0182171	0.05023
Ralgapb	1.65871	0.0593681	18.2899	0.000396901	0.00186053
Aim1l	-1.65825	0.496956	23.7662	0.000101454	0.000570749
Mfap5	-1.65814	-0.621458	11.5391	0.00298169	0.0107924
2610109H07Rik	-1.65766	1.24037	46.083	1.63369e-06	1.60685e-05
2010002M12Rik	-1.65047	0.913777	34.0744	1.20505e-05	8.9843e-05
Lrrtm2	-1.64989	2.62267	108.43	2.37794e-09	7.01661e-08
Aknad1	1.64657	0.0287786	20.1473	0.000244303	0.00121619
Gbp2	-1.64563	5.53974	172.15	1.57088e-06	1.55676e-05
Pcdhga4	1.64341	-0.251155	14.807	0.00106255	0.00439754
B930003M22Rik	1.64237	-1.26988	5.45663	0.0304508	0.0763919
Pi16	1.6403	-1.62147	3.85725	0.0641347	0.14037
Grm3	1.63731	-1.43548	4.86519	0.0397461	0.095491
Ctnnbip1	-1.62781	-1.23193	5.52389	0.0295598	0.0746478
Ddit3	1.62491	8.16854	883.665	1.01851e-16	1.47243e-13
Fam60a	1.62384	-0.894632	8.54523	0.00863784	0.0266357
Upk3b	1.62281	-0.779064	10.1236	0.00485134	0.0163823
Kbtbd5	1.62265	-1.62168	4.18925	0.0545786	0.123693
Mpeg1	-1.6223	-0.330082	13.1802	0.00174996	0.00680684
Krt20	-1.62165	6.98906	627.121	3.76938e-15	1.8802e-12
Tnnc1	1.61934	2.08284	73.3938	5.37912e-08	8.98665e-07
Abca12	1.61926	-1.43544	4.74641	0.0419808	0.0998294
BC017612	-1.6184	-0.987805	8.16933	0.00996917	0.030025
AK143926	1.61439	-1.4354	5.19968	0.0341467	0.084122
Cxcl5	1.61346	-0.725249	7.96163	0.0108024	0.0322195
Cul7	-1.61246	-1.27026	5.97043	0.0243407	0.0637582
AK041762	1.6052	0.988995	35.1175	9.95368e-06	7.59948e-05
Lag3	-1.60442	-0.290121	13.6975	0.00148878	0.00590942
Podnl1	-1.6035	4.24493	207.276	9.21766e-12	8.19117e-10
AK171687	1.6007	-1.67221	3.6878	0.0697484	0.150116
Tmem183a	-1.59963	-0.83641	8.97349	0.00735768	0.0231725
Magea3	-1.59928	-1.27049	4.92517	0.0386694	0.0934406
A4gnt	-1.5984	-0.672066	10.6859	0.00398543	0.0138008
H2-T22	-1.59815	0.930006	33.4063	1.36482e-05	9.96969e-05
Tspan2	1.59783	-0.751837	9.90057	0.00525119	0.0175291
Krt86	1.5961	-0.622379	9.31878	0.00647905	0.0208825
AK057615	1.59597	0.235066	21.1295	0.000190877	0.000980118
Btg2	1.5954	5.36094	427.215	1.31543e-14	3.82754e-12
AK029473	1.58934	-0.894439	8.69926	0.00815076	0.0253276
H2-T23	-1.58718	1.86894	55.048	4.63644e-07	5.50019e-06
Pdzd7	1.5839	1.31441	36.7786	7.39808e-06	5.87528e-05
AK145231	-1.57883	-0.779507	8.73707	0.00803593	0.0250451
Triobp	-1.57878	0.719521	28.6851	3.45751e-05	0.000222466
BC051212	-1.57871	1.57927	43.8515	2.2977e-06	2.16832e-05
Bpil2	1.57419	-1.19405	6.38359	0.0204231	0.055137
Gjb4	-1.57273	1.09127	29.1655	3.13207e-05	0.000204294
Cacnb1	-1.57083	-1.43565	4.29067	0.0519938	0.118709
Map3k15	1.56473	-1.30969	5.64014	0.0280886	0.071658
Gadd45a	1.56123	8.04473	138.092	0.000525533	0.00237385
Tgfbrap1	1.55678	-0.89467	8.29989	0.00948238	0.0288074
Pdpn	-1.55663	6.33301	564.557	9.89967e-16	6.48119e-13
Srsf1	1.55515	-0.573266	9.87624	0.00529701	0.0176483
G630025P09Rik	-1.55316	0.23381	20.2745	0.000236528	0.00118208
Pcdh7	-1.54946	1.12018	35.8512	8.72103e-06	6.80952e-05
Leprot	1.54629	-1.47995	3.79406	0.0661647	0.143926
4922505G16Rik	1.54409	-1.67232	3.60723	0.0726158	0.154635
Axin2	1.54318	1.06044	35.984	8.51654e-06	6.67246e-05
Col22a1	1.54141	-1.19398	6.02576	0.0237699	0.0624376
Fam78b	-1.54138	-1.02009	7.01489	0.0157342	0.0443174
Chrac1	1.53608	-1.30956	5.24658	0.0334358	0.0827013
Doc2a	-1.53431	-0.894782	7.90555	0.0110405	0.0327739
Il23a	1.53357	-0.596768	10.0183	0.00503576	0.0169178
AK155592	1.52853	0.542084	24.024	9.55875e-05	0.000540356
Hephl1	1.52584	-0.807046	8.34366	0.00932516	0.0284204
Col6a2	-1.52555	-0.75252	8.77019	0.00793685	0.0247657
1110018G07Rik	1.51936	-1.67254	2.88321	0.105611	0.20638
Ttc36	1.51929	-1.3502	3.83742	0.0647639	0.141504
Pcdhgb7	1.51767	1.06051	35.0782	1.00249e-05	7.64829e-05
Pex11a	-1.5164	-0.0535153	14.1239	0.00130587	0.00527331
Ifitm3	-1.51539	10.1889	895.248	1.0478e-14	3.42991e-12
Esx1	-1.51513	-1.15755	5.53659	0.0293949	0.0743567
Gm1006	1.51331	1.32843	22.5711	0.000333928	0.0015979
BC079901	-1.51299	-0.752398	8.44821	0.00896132	0.0274955
DQ711019	1.51223	0.946698	31.7172	1.88369e-05	0.000132161
Kcna7	-1.51215	-1.47971	3.57996	0.0736169	0.155943
Adm2	1.51038	2.78212	83.8973	1.89069e-08	3.78679e-07
Dpt	1.51015	-0.924994	7.76382	0.011669	0.0343543
Kcnj2	1.50968	6.92807	554.249	4.56588e-15	1.99282e-12
AK087755	-1.50905	-1.67239	3.17576	0.0905166	0.183752
Gcnt2	-1.50865	2.43236	87.2742	1.3821e-08	2.87822e-07
Cbr1	1.50747	-1.30978	4.64349	0.0440336	0.10371
Cnot8	-1.50613	-0.894918	6.16055	0.0224415	0.0595577
Nlrp10	-1.5057	-0.698569	6.65428	0.0185457	0.0509083
Fam171a2	-1.50255	2.69261	102.598	3.74401e-09	1.00047e-07
Ypel2	1.50177	2.24495	60.5493	2.30664e-07	3.04616e-06
B630005N14Rik	1.50053	2.61573	90.6901	1.01684e-08	2.23301e-07
Nt5dc2	1.50046	0.288334	20.8809	0.000203055	0.00103554
Nhsl1	-1.50001	-1.4798	4.30053	0.0517499	0.118229
Slc5a6	-1.49632	-0.413951	10.9957	0.00358287	0.0126026
Oas1c	-1.48905	2.77257	102.763	3.69514e-09	9.89937e-08
Ccr1	-1.48822	3.41225	110.656	2.41911e-09	7.09808e-08
Meis2	-1.48594	-1.35003	4.48758	0.0473653	0.10987
Trem3	1.48308	-0.835766	8.06024	0.0103975	0.0311537
Prr22	1.48284	-1.05368	5.6945	0.0274292	0.0703357
Trim30a	-1.47843	6.2512	616.505	4.35187e-16	3.60224e-13
Mafa	-1.47773	0.719339	21.5282	0.000173	0.000897615
Zfp760	1.475	3.00769	96.9853	5.91896e-09	1.4319e-07
St8sia6	1.47063	-1.67233	3.00405	0.0990425	0.196859
Rbp1	-1.46952	2.36106	77.1752	3.6432e-08	6.44637e-07
1700084E18Rik	1.46939	-1.05322	5.81759	0.0259999	0.067313
Mbd5	1.46837	1.22157	35.8815	8.6739e-06	6.78559e-05
Tax1bp3	-1.46369	-0.835777	7.91243	0.011011	0.0327205
Fam3b	-1.46118	-1.47959	3.55696	0.0744741	0.157377
Cst6	-1.45995	1.21857	28.0073	3.98205e-05	0.000250823
Stard5	1.45834	7.11824	697.121	1.3767e-16	1.60233e-13
AK017040	1.45791	-1.72469	2.66741	0.118669	0.225969
Bdkrb2	1.45599	4.37193	222.66	4.88386e-12	4.91908e-10
Parp12	-1.4558	7.37161	551.131	5.91459e-14	1.37679e-11
Gfpt2	1.45352	-0.724897	8.41198	0.00908557	0.0278197
Arl11	1.45293	4.85719	35.722	0.00554217	0.0183542
Nap1l2	1.45282	0.328545	17.7577	0.000458308	0.0021056
Dnase1l3	-1.44823	-1.05318	5.63164	0.0281933	0.0718726
Prtg	-1.4467	-1.52553	3.50567	0.0764272	0.160823
Hist3h2a	1.4453	-0.250349	11.6231	0.0028992	0.0105522
Irgm1	-1.44414	7.7475	408.61	1.06793e-09	3.71647e-08
Tm4sf4	-1.4423	-1.1941	4.4987	0.0471185	0.109438
2310002L13Rik	-1.4415	5.13147	178.571	8.32528e-09	1.88353e-07
Rnmt	1.44039	-1.05397	5.31615	0.0324118	0.0806829
Stk40	1.43988	-1.23149	5.12052	0.0353861	0.0867468
Asb17	-1.43899	-0.987107	4.85342	0.0399614	0.0958763
Lgals3bp	-1.43899	9.02423	465.454	2.78552e-09	7.85021e-08
AK079730	1.43876	0.193215	17.9615	0.000433627	0.00200718
AK045112	1.43829	-1.23203	4.35829	0.0503484	0.115632
Snord49a	1.43779	-0.12148	14.3776	0.00120892	0.00494471
Ly6f	1.43468	-0.807201	6.34171	0.0207859	0.055958
Rel	1.43357	4.91563	322.207	1.74943e-13	3.10598e-11
Cnnm2	-1.43221	-1.35063	3.47536	0.0776095	0.162669
AK039862	-1.4319	-1.35014	4.03819	0.0587073	0.131093
Gjb5	-1.42837	0.530859	22.3567	0.000141484	0.000756143
Kcnu1	-1.42521	1.89077	52.6377	6.40206e-07	7.1647e-06
D18Ertd653e	-1.42501	1.36616	34.12	1.19493e-05	8.92897e-05
EG625321	-1.42319	-0.39268	10.6806	0.00399275	0.013817
Sohlh2	1.42125	-0.371614	9.28411	0.00656176	0.0211166
Ier5l	-1.42017	3.07706	111.345	1.91003e-09	5.89556e-08
AK148766	-1.41861	-0.309398	11.4311	0.00309157	0.0110981
Hpdl	-1.41837	3.30827	123.915	7.83284e-10	2.89926e-08
Arsj	-1.41334	5.62259	384.164	3.49909e-14	8.52396e-12
Sh2d6	1.41138	0.0746476	15.5106	0.000863371	0.00367187
AK162911	1.41072	-1.72477	2.96408	0.10116	0.200086
Myct1	1.40922	0.739267	22.6456	0.000132034	0.000713649
Nupr1	1.40766	7.38741	583.694	2.41451e-15	1.33116e-12
Ifi35	-1.40709	6.04583	346.786	2.74885e-13	4.72037e-11
Psmc4	-1.40555	-1.35038	4.22543	0.0536399	0.12183
Tssk6	-1.40537	2.1057	49.0441	1.05786e-06	1.11035e-05
Aldh1a1	1.40105	-0.0870273	13.4916	0.00158718	0.00623853
Cbln3	1.401	-0.457398	9.15218	0.00688742	0.0219622
AK032387	-1.39979	0.426596	19.8541	0.000263316	0.00129494
Abca3	-1.39787	-1.72508	2.52694	0.128203	0.24028
Srl	-1.39583	-1.19455	4.59031	0.0451389	0.105707
Rac2	1.39486	-1.15794	4.10712	0.0567804	0.127634
Top3a	-1.39341	-0.836229	6.5363	0.0191593	0.0522911
Atxn7l2	-1.39267	-0.502955	8.33758	0.00934683	0.0284699
Tcp11l2	1.39253	1.39789	34.5374	1.10649e-05	8.35051e-05
Zfyve1	1.39131	-1.72495	2.84245	0.107942	0.209942
DQ567485	1.39101	0.341137	17.5347	0.000487102	0.00222133
Ddx60	-1.38598	4.21837	186.021	2.39029e-11	1.74465e-09
2210404J11Rik	1.38418	-0.672434	8.10725	0.0102104	0.0306723
Zscan20	1.38402	-0.32962	7.90574	0.0113016	0.0334513
Sdhaf2	-1.38293	-1.35046	4.16298	0.0552722	0.125103
Nudt6	1.3821	-1.43555	3.14433	0.0920107	0.186064
Rnaset2a	1.3821	-1.43555	3.14433	0.0920107	0.186064
1110028C15Rik	1.38204	0.0284678	14.6552	0.00111192	0.00458556
Spef1	-1.38168	-0.457919	8.79366	0.00786746	0.0245842
AU021092	1.37941	2.24511	60.0365	2.45658e-07	3.21141e-06
Fbxl22	1.37896	-0.309519	11.8029	0.00273097	0.010045
Zbtb49	1.37792	0.248809	17.6083	0.000477381	0.0021789
Akr1b7	1.37641	2.45108	68.1003	9.54502e-08	1.45962e-06
Gemin8	-1.37385	-0.251273	11.653	0.00287041	0.0104765
BC006779	-1.3738	8.29249	476.59	6.45827e-11	3.95616e-09
Nrg2	-1.36972	1.62237	41.7416	3.20908e-06	2.88541e-05
Asgr2	-1.36476	-1.43539	3.1875	0.0899661	0.182989
Ddx17	1.36418	3.90857	101.333	3.11093e-08	5.707e-07
Pnp2	-1.3624	1.90759	50.6849	8.38342e-07	9.14753e-06
Acpp	1.36187	-0.597066	8.71353	0.00810722	0.0252447
Mett5d1	1.36161	-1.01985	4.77699	0.0413922	0.0986312
Mir3064	1.35886	-0.310276	8.68733	0.00818737	0.0254036
Herc6	-1.3582	4.40176	185.824	2.41263e-11	1.74465e-09
Ift52	-1.35817	-1.08766	5.29454	0.032726	0.0812719
Clcn3	1.3574	-0.621195	6.76137	0.0174539	0.0484702
Hnf1a	1.35688	-1.05331	5.60848	0.0284809	0.0724823
Cobll1	-1.35549	-0.894989	4.63288	0.0444866	0.104554
2810442I21Rik	1.35516	-1.27012	3.9569	0.0610773	0.135139
Pim1	-1.35497	-0.956424	5.79406	0.0262664	0.0679527
rsk3	1.35436	-0.371641	7.46885	0.0133269	0.038606
Samd9l	-1.35417	7.26619	455.213	3.26013e-13	5.32358e-11
Chpf2	-1.35167	2.05527	54.352	5.08358e-07	5.9036e-06
AK044480	-1.34812	-1.52566	3.19987	0.0893895	0.182099
Ptplad2	1.34428	1.89491	42.625	2.78622e-06	2.55566e-05
mKIAA0248	-1.34374	-1.3925	3.38734	0.0811649	0.168591
Zfp839	1.34329	-0.835704	6.43506	0.0199869	0.054211
Mllt3	-1.34141	-0.193914	11.0709	0.0034922	0.01235
Srsf7	1.34055	-1.77924	2.31585	0.144315	0.263869
Gm5098	-1.33962	-1.12194	4.78068	0.0413217	0.0985753
C3	1.33937	0.964468	26.0085	6.11695e-05	0.000365934
Tusc1	-1.33884	0.519775	18.4983	0.000375389	0.00177286
T2	-1.33659	-0.895345	5.05095	0.0365175	0.0891036
Cbr4	1.3365	-1.62166	2.83228	0.108533	0.210924
Gpbp1l1	1.33582	5.96346	463.344	6.2097e-15	2.24299e-12
Arhgap40	1.33496	-0.835942	5.79094	0.0263019	0.0680111
LOC106740	1.33422	4.05413	138.156	3.12401e-10	1.38661e-08
Tnn	1.333	-1.1581	4.7989	0.0409762	0.0979519
Grem1	1.33266	7.7684	558.52	4.26723e-15	1.99282e-12
Zfp608	1.33211	1.60324	38.0581	5.92269e-06	4.82803e-05
Wipf1	1.33078	-0.457062	9.4737	0.00612343	0.0199574
Rusc1	-1.33013	-0.86554	5.65674	0.0278854	0.0712784
AK049578	-1.32613	-0.525442	8.62125	0.00839348	0.0259586
Deaf1	-1.32428	0.426586	18.352	0.000390351	0.00183442
Flot2	-1.32406	-0.698297	7.26788	0.0142057	0.0405794
Sp100	-1.32222	4.90242	237.263	2.77165e-12	2.93263e-10
1700012B09Rik	-1.32216	2.75342	66.1057	1.19571e-07	1.77913e-06
Car9	1.32209	-0.15791	11.638	0.00288483	0.0105145
Gm15070	1.3207	-0.956317	5.45734	0.0304413	0.0763919
Hinfp	1.31796	-1.1574	4.36831	0.0501094	0.11521
Slc30a4	1.31782	3.52063	133.937	4.06495e-10	1.7239e-08
Ugt1a6	1.31772	-1.02022	4.84362	0.0401416	0.0962205
AY096003	1.31414	-0.621781	7.90646	0.0110366	0.0327739
1810006K21Rik	-1.3123	-1.57276	2.39396	0.138085	0.255148
Arfip2	-1.31137	-1.35031	3.49182	0.0769647	0.161661
Oxnad1	1.31094	0.135158	13.95	0.00137728	0.00552757
Mrc1	-1.31069	0.62771	17.6778	0.000468401	0.00214539
LOC668917	1.31037	-0.54917	7.96459	0.01079	0.0321991
AK030268	-1.31025	4.04631	153.322	1.28161e-10	6.81468e-09
Napb	1.30997	3.28868	107.517	2.54944e-09	7.37719e-08
AK156477	1.30899	-0.836208	5.53737	0.0293848	0.0743492
Gpr176	-1.30831	-1.0209	4.51253	0.0468134	0.108899
Cdh26	1.30826	0.639828	20.5838	0.000218751	0.00110377
Gm12250	-1.30745	-0.0876138	11.4172	0.00310607	0.0111444
Dnm3	1.3032	-1.30984	2.87818	0.106178	0.207156
BC100534	-1.30242	-1.7789	2.09266	0.164092	0.291087
Myo7a	-1.29952	2.43557	44.9915	2.50216e-06	2.32772e-05
AW549877	1.2992	1.64983	39.7724	4.43129e-06	3.78474e-05
Msln	-1.29905	0.786806	16.7463	0.000606192	0.0026872
AK080010	1.29776	-0.724784	7.12701	0.0150351	0.0425372
Zmynd8	1.29668	-1.27009	3.18183	0.0902316	0.183458
Tmem176b	1.29652	2.34799	62.5035	1.8213e-07	2.47446e-06
Crebl2	1.29634	2.28329	57.4965	3.37679e-07	4.20593e-06
2810026P18Rik	1.29594	6.83507	447.443	8.5789e-15	2.89884e-12
Akap6	1.29474	0.0119167	12.3903	0.00225271	0.00848818
B3galnt1	-1.29414	3.20329	106.019	2.86126e-09	8.01381e-08
1810031K17Rik	-1.29315	-1.2705	4.08588	0.0573664	0.128648
Cacng6	-1.29274	-1.12258	4.41974	0.0489045	0.112886
PAPK-A	1.29184	-1.62183	2.50231	0.129967	0.242837
9330111N05Rik	-1.28439	-0.158102	11.443	0.00307924	0.0110614
Rfc3	-1.28438	-0.392753	8.80301	0.00784	0.0245073
Tnfaip6	1.28397	-0.698521	6.60822	0.0185947	0.0510162
Itpka	-1.28326	-0.924945	5.29475	0.032723	0.0812719
Tanc1	-1.28297	-1.27032	2.99694	0.0994157	0.197268
Acta1	-1.28286	-1.02091	4.64276	0.0440484	0.10371
Pkig	-1.28247	-1.57306	2.9451	0.102185	0.201618
Hmgxb3	-1.28114	-0.698801	6.97559	0.0159878	0.0449109
DQ696615	1.28083	0.690788	20.0211	0.000252293	0.00124777
Zfp174	1.28071	-1.47973	2.83003	0.108664	0.211046
BC019819	-1.27949	2.83011	83.4839	1.96603e-08	3.91524e-07
Ldlr	-1.27923	1.37031	28.3539	3.70361e-05	0.000235551
AK148313	1.27849	-1.62159	2.69015	0.117206	0.223881
Trib3	1.27752	9.48768	223.758	1.0081e-05	7.68544e-05
AK009639	-1.27751	-1.39312	2.73212	0.114562	0.220069
Fbxl5	1.27551	2.01496	47.7379	1.2783e-06	1.30381e-05
Phka2	1.27492	-0.955669	4.68678	0.0431565	0.102092
Dtx3l	-1.2746	5.99347	303.628	4.14774e-13	6.03438e-11
Cadm1	1.27183	-2.02014	1.44956	0.243191	0.391611
Rapgefl1	-1.26973	0.708869	18.771	0.000349166	0.00166058
DQ560772	1.26802	3.12185	95.9763	6.44218e-09	1.52674e-07
Speer3	-1.26794	-0.78004	6.27382	0.0213896	0.0573033
Tm2d3	1.2656	-1.1221	4.52001	0.0466494	0.108541
Snep	1.26302	1.93523	40.1395	4.16913e-06	3.58552e-05
Spata13	-1.26269	-1.27034	3.61213	0.0724374	0.154349
Flcn	-1.26193	-1.12274	3.75474	0.0674653	0.146193
4831440E17Rik	1.26187	-1.5728	2.78014	0.111623	0.215649
Zmynd19	-1.26169	-1.43572	3.07754	0.0952834	0.191352
Hmcn1	-1.26142	-0.176388	9.58967	0.00587146	0.0192862
Letm2	1.26123	-0.621158	7.23509	0.0143941	0.0410057
Ica1	1.2597	-0.955907	5.31509	0.0324272	0.080702
2700094K13Rik	1.25775	-0.350063	9.27475	0.00658427	0.0211686
AK163166	1.25731	-0.140287	9.07417	0.00708847	0.0225005
AK161406	1.25706	-1.08749	4.68938	0.0431044	0.101997
Dpy30	-1.25645	-1.77913	1.82197	0.192736	0.327798
H28	-1.25616	1.04983	21.5333	0.000172784	0.000897615
AK142847	1.25413	-0.864638	5.31167	0.0324766	0.0807893
Id2	-1.25335	5.67124	281.78	5.90634e-13	8.24918e-11
Fstl3	-1.25246	3.8245	123.567	8.01983e-10	2.95798e-08
Fbln2	-1.25174	1.14937	25.5841	6.71782e-05	0.000397117
Zfp493	1.25136	2.14602	45.5233	1.77757e-06	1.72728e-05
Pvrl1	-1.2499	4.8812	207.772	9.02467e-12	8.14943e-10
Dner	1.248	0.913082	22.3036	0.000143298	0.000763894
Gm10941	1.24721	-0.987623	4.91817	0.0387934	0.0936747
Srp54a	1.2426	1.9413	1.86469	0.283069	0.436372
Vmn1r40	1.24164	-1.08719	4.54122	0.0461876	0.107754
5730419I09Rik	1.24137	-0.213266	9.21826	0.00672209	0.0215399
AK087340	-1.24136	-1.43507	2.87921	0.105837	0.206683
Mbnl2	1.24066	1.19959	10.7105	0.00816397	0.025346
AW011738	-1.23877	2.08448	38.5176	5.47482e-06	4.50855e-05
Gm5057	-1.23698	0.192162	13.7998	0.00144242	0.005745
Sdc1	-1.23632	0.638282	16.2495	0.000697679	0.00303496
Fabp4	-1.23628	-0.414313	8.01311	0.0105888	0.0316546
Hist1h2ag	1.23603	-0.925322	4.6184	0.0445513	0.104641
Ngef	-1.23554	-1.30984	3.52764	0.0755834	0.159431
Ccdc78	-1.23417	-1.47961	2.92445	0.103314	0.20327
Ifit3	-1.23397	3.35738	101.303	4.15334e-09	1.07689e-07
Mllt11	1.23115	5.52154	305.193	2.86555e-13	4.84139e-11
Nptn	1.23099	-0.270226	9.30949	0.00650109	0.0209471
Agpat9	1.23058	-0.647391	5.65923	0.0278549	0.0712181
Xpo7	-1.22653	-1.39286	2.91237	0.10398	0.20416
AK164850	-1.22563	-1.31036	2.17967	0.158822	0.284241
Prr7	-1.22369	1.62167	33.1435	1.43394e-05	0.000104093
Mms19	-1.22312	-1.19392	3.88903	0.0631407	0.138745
Bcl9	-1.22258	-1.27052	3.64575	0.0712282	0.152529
Calcrl	1.22209	4.14701	52.828	7.69832e-05	0.000447006
Dok2	-1.22197	-1.05409	4.17324	0.0550001	0.124541
Cnga3	-1.22173	-1.4356	3.09256	0.0945357	0.190276
Aldh1a7	1.22149	-1.08687	3.4659	0.0779826	0.163158
AK008491	-1.22071	-0.864887	5.01055	0.0371936	0.090556
Mlph	1.21935	1.68049	31.0323	2.15342e-05	0.000148695
Snai2	1.21872	6.94431	470.986	5.33647e-15	2.14998e-12
Prkcd	-1.21827	-0.779493	5.69452	0.0274289	0.0703357
Magea8	-1.21768	1.99199	43.4653	2.44049e-06	2.28047e-05
Gpr84	1.21652	-1.47913	2.34763	0.14174	0.26024
Sema3g	1.21553	0.878225	17.1081	0.000547957	0.00246134
Ncf4	1.21532	-0.647159	6.17815	0.0222742	0.0591738
4930550C14Rik	1.21484	-1.47975	2.94694	0.102085	0.201534
6230400D17Rik	-1.21418	-0.779182	5.93981	0.0246633	0.0644743
D630032N06Rik	-1.21378	-0.549305	6.10282	0.0229999	0.0607933
AK076583	-1.21373	-0.502377	6.78666	0.0172732	0.0480704
Zfp57	1.21227	1.74859	29.9931	2.64793e-05	0.000177347
Eltd1	-1.21142	-1.62187	2.30992	0.144802	0.264482
Mthfs	-1.20963	-1.43577	2.79827	0.110537	0.213906
BC028528	1.20962	-1.0873	4.15784	0.0554088	0.125331
AK087736	1.20804	-0.987815	4.71925	0.0425117	0.100831
Slc25a45	1.20802	1.34716	28.8226	3.36072e-05	0.000216904
Jag2	1.20798	-0.194982	8.21486	0.00979629	0.0296065
Thap6	1.20761	-0.290376	7.93371	0.0109202	0.0324969
Sat1	1.20753	2.32427	51.1792	7.82468e-07	8.56463e-06
AK045688	1.20675	0.402961	15.2014	0.000945282	0.00397185
Thoc6	-1.20385	-1.08715	3.91833	0.0622404	0.137256
AK006454	1.20338	-1.23175	3.79385	0.0661716	0.143926
6030458C11Rik	1.20296	1.55849	25.4752	6.88239e-05	0.000405017
Lyrm5	1.20196	-0.894632	5.11602	0.035458	0.0868826
Pdzd4	-1.19917	0.814299	18.5968	0.000365675	0.00173245
Slc18a1	-1.19782	-1.19421	3.57779	0.0736976	0.156051
Chuk	-1.19721	-1.15826	3.29736	0.0849971	0.17492
Gas2l1	-1.19605	-0.158429	9.54565	0.00596572	0.0195345
Spry3	-1.19604	-0.956102	4.85871	0.0398646	0.0956659
Gsta2	-1.19598	-0.43576	7.72169	0.0118635	0.0349073
Neil1	1.19459	-0.77956	4.32994	0.0510307	0.116815
Filip1l	1.19435	-1.01986	4.46719	0.0478222	0.110729
Krt7	1.19424	0.877585	17.6525	0.000471649	0.00215838
Syt4	1.19383	4.84121	207.251	9.22729e-12	8.19117e-10
BC044870	1.1932	0.787194	16.206	0.000706378	0.00306643
4930590J08Rik	1.19239	-0.925252	4.69551	0.042982	0.101794
Ifih1	-1.19185	0.758875	18.575	0.000367797	0.00174172
Tomm5	-1.19182	-1.4795	2.16237	0.15758	0.282548
Mov10	-1.1905	-0.289956	8.81762	0.00779731	0.0243884
Slfn8	-1.18959	2.83637	66.4964	1.14361e-07	1.70888e-06
4732416N19Rik	1.18881	-1.52542	2.49292	0.130647	0.243771
Cpox	1.1886	8.09539	330.207	1.21979e-09	4.14848e-08
Fam126b	1.18855	-0.0370333	8.36735	0.00924128	0.0282058
Tia1	1.18846	1.48209	23.0681	0.000119445	0.00065679
Ppa2	1.18589	-1.47958	2.72445	0.11504	0.220744
Zdhhc1	-1.18491	-0.105193	8.75996	0.0079673	0.0248533
4930503L19Rik	1.18343	1.55422	25.8191	6.37746e-05	0.000379783
Klhl2	-1.18287	-1.31002	3.16022	0.091252	0.184994
Slc38a6	-1.18258	2.84616	70.4316	7.3833e-08	1.1862e-06
DQ688647	1.18217	0.896689	18.8722	0.000339951	0.00162084
Kdelr3	-1.18046	5.33631	261.37	1.16369e-12	1.38519e-10
Tnfrsf21	-1.18031	-1.77955	1.7662	0.199388	0.336706
Gpr116	1.17809	0.541968	13.2571	0.0017081	0.00666134
Pqbp1	-1.17607	0.0436324	11.0198	0.00355361	0.0125165
Gm15760	1.17588	-0.525896	6.07253	0.0232991	0.0614444
Cyp4f40	1.17576	1.52614	27.4495	4.48014e-05	0.000277197
Txlnb	1.17466	0.815781	16.5687	0.000637267	0.00280478
Inpp5b	1.17384	2.40718	52.4747	6.54589e-07	7.29449e-06
Syt7	-1.1724	-1.08704	3.54487	0.074929	0.15821
Btnl7	1.17185	-1.12241	3.02128	0.098146	0.195581
Gm5151	1.16982	-0.122424	9.45059	0.00617507	0.0201069
Dusp9	-1.16833	7.98677	364.185	4.49793e-11	2.92645e-09
Glul	-1.16719	8.10225	585.141	7.08799e-16	4.94978e-13
D1Ertd622e	-1.16588	-0.232482	9.04078	0.00717651	0.0227043
Cwc22	-1.16468	-1.43554	2.7781	0.111746	0.215799
Scarna9	1.16455	-0.0692538	9.34298	0.00642201	0.0207178
mKIAA0185	-1.1623	-1.62187	2.26813	0.148289	0.269161
AK048037	1.16228	0.414996	12.8466	0.00194528	0.00747497
Mrps23	-1.16206	0.0278432	10.5457	0.00418394	0.0143833
Lonp1	1.16155	2.13732	29.4416	3.51476e-05	0.000225319
AK163775	-1.16087	-1.62222	1.64744	0.214806	0.355859
mKIAA1417	1.16008	-1.47944	2.6154	0.122097	0.231235
1700013F07Rik	1.15966	2.17543	39.3362	4.76681e-06	4.02356e-05
mKIAA1584	1.15959	-1.35072	2.76167	0.112743	0.217332
5730528L13Rik	-1.15932	-0.779654	5.018	0.0370677	0.0902987
Slc6a8	-1.15778	-0.270921	8.26061	0.00962596	0.029159
Cmbl	-1.15677	-1.31042	3.0673	0.095797	0.192052
BC050122	1.15419	2.50498	50.502	8.60126e-07	9.34628e-06
Pigy	1.15365	1.70665	32.348	1.66799e-05	0.000119264
Notch1	1.15266	5.92627	333.37	1.2824e-13	2.44238e-11
Ephx4	-1.15249	-0.0205353	10.4941	0.00425969	0.0145969
Ccdc74a	-1.15192	2.17345	44.3206	2.13654e-06	2.03272e-05
Tpp1	1.15172	0.497307	14.23	0.0012643	0.00513023
Sned1	1.15142	1.97147	35.7239	8.92216e-06	6.92807e-05
2200002K05Rik	-1.15057	-1.19456	3.48843	0.077097	0.16186
Nfil3	1.15042	-1.67254	1.72096	0.204996	0.343683
AK041972	1.14979	0.824334	17.8266	0.000449787	0.00207282
Six1	-1.1496	4.70292	189.815	2.00225e-11	1.50889e-09
Hap1	-1.14559	-0.779637	4.68927	0.0431067	0.101997
Ssbp4	-1.1441	0.885011	17.4094	0.000504155	0.0022941
S100a5	1.14326	-1.12198	3.50119	0.0766006	0.161058
Afp	-1.14316	2.27658	46.3221	1.57619e-06	1.55907e-05
R74862	1.1431	-1.67249	2.11445	0.162022	0.288539
2610008E11Rik	1.14265	4.71276	194.732	1.59909e-11	1.25943e-09
Klk10	-1.14217	6.85	54.5909	0.00264568	0.00976676
Eps8	1.14183	-0.988111	3.8671	0.0638247	0.139838
4931406H21Rik	-1.14038	-1.47941	2.41855	0.13619	0.251959
Cln6	-1.13959	-1.05455	2.96487	0.101118	0.20004
Cdt1	-1.13939	1.01069	15.7634	0.000802208	0.00342985
Actr3	1.13884	-1.12236	3.70497	0.0691545	0.149329
Eri3	1.13782	0.0751066	9.06666	0.00710815	0.0225562
Ppfibp1	1.13774	-1.48008	1.91024	0.182762	0.31508
AK142198	1.13768	0.105549	11.1737	0.00337226	0.0119663
Tmem125	1.13734	3.82007	104.298	3.27269e-09	8.99776e-08
Derp6	-1.13683	0.833348	15.9449	0.000761282	0.00327627
AK076978	1.13619	0.903993	17.9517	0.000434772	0.00201159
Mllt10	-1.13613	-1.47984	2.52523	0.128324	0.240378
BC049715	1.13396	-1.23237	2.7977	0.110571	0.213933
Epb4.9	-1.13211	-0.176946	8.75863	0.00797128	0.0248583
Chpf	-1.13073	-0.231987	8.34712	0.00931285	0.0283995
Rn3	-1.1302	-0.865397	4.5239	0.0465643	0.108391
Slc4a8	-1.12903	2.35873	39.7697	4.43329e-06	3.78474e-05
AK157632	1.12838	-1.67241	2.08736	0.164601	0.291643
Rnf213	-1.12793	7.72844	255.929	1.13889e-08	2.45977e-07
cip7	1.12696	1.64434	26.2299	5.8272e-05	0.000350201
Acot2	1.12691	6.45012	130.999	2.70866e-06	2.49426e-05
Slc6a9	1.12589	8.10916	404.278	6.75039e-13	9.18317e-11
Abcc5	1.12572	2.56957	43.454	2.44478e-06	2.28245e-05
Dhrs9	1.12534	7.30681	202.897	1.20612e-07	1.78953e-06
Ptpn1	1.12444	-1.0199	3.6456	0.0712335	0.152529
AK132720	-1.12414	-0.414288	6.21829	0.0218982	0.0584267
Nat8	1.12377	-1.1579	2.99301	0.0996222	0.197603
Slc27a6	1.12362	-0.894932	3.66145	0.0706715	0.151666
Mlx	-1.1224	-0.572865	4.96171	0.0380298	0.0921495
TAF170	1.12167	-1.12196	3.65801	0.070793	0.151896
Hist1h2ac	1.12164	0.391487	12.5108	0.00216658	0.00821385
2610021K21Rik	1.1208	3.73883	102.306	3.8321e-09	1.01881e-07
Zc3h6	1.12036	3.69794	107.126	2.62709e-09	7.51878e-08
H2-gs10	-1.11993	-0.646931	5.05241	0.0364934	0.0891036
Rg9mtd2	-1.11948	-1.23197	3.22415	0.0882715	0.180207
Trim30	-1.11929	0.302426	8.24435	0.0100869	0.030336
AK019125	1.11877	-1.39168	1.74216	0.204647	0.343262
Gps1	-1.11809	0.757137	15.0804	0.000979672	0.00410155
AK045225	-1.11807	-0.987862	3.05356	0.0964914	0.192919
Akap8	1.11609	-0.392787	5.6041	0.0285356	0.0725688
Pcqap	1.11557	-1.02044	3.37361	0.0817363	0.169576
AK036982	-1.11422	3.64158	31.3929	0.00058904	0.00262115
Tmem179	-1.11421	2.6776	56.7255	3.7271e-07	4.57159e-06
Npm2	-1.11356	-1.23177	3.19929	0.0894165	0.182119
Ugt2b35	-1.11305	-0.671971	5.58794	0.0287387	0.072979
AK165329	-1.11173	-1.83639	1.15435	0.29632	0.450698
Dysfip1	-1.11035	-1.23213	3.15496	0.0915022	0.185322
AK018214	-1.1098	-1.67254	1.82588	0.192279	0.327287
Obscn	1.10979	0.0128494	8.65294	0.00829392	0.0256886
Spnb3	-1.10923	0.0276372	9.60937	0.00582983	0.0191554
Rnf128	-1.10899	5.51901	245.264	2.05984e-12	2.27124e-10
Selp	-1.10606	-0.232919	6.20957	0.0219793	0.0585835
Ankrd49	1.10586	-1.02045	3.37755	0.0815719	0.169305
AY074887	-1.10585	-1.19503	2.62507	0.121451	0.230137
Ppt1	-1.10525	-0.622069	5.21599	0.0338975	0.0836457
Epha2	1.10517	9.38577	629.922	3.55821e-16	3.38838e-13
Dlk2	-1.10516	-0.924912	4.13631	0.0559863	0.126446
A730017L22Rik	-1.10431	-0.865721	4.35656	0.0503897	0.115702
AK045970	1.10429	1.33491	21.825	0.000160895	0.000845225
Ccdc85b	-1.1042	2.17132	29.7119	2.80245e-05	0.000186504
2310002J15Rik	1.10413	-1.39223	2.75698	0.113029	0.217724
Qars	-1.10383	-1.35034	2.67873	0.117938	0.224904
Irf9	-1.10377	1.32777	22.8343	0.000126238	0.000688718
C8g	1.10361	-0.330391	6.58147	0.0188025	0.0514379
Cand2	-1.10285	5.58181	268.829	9.03182e-13	1.13986e-10
Pipox	1.10176	-0.779073	5.03521	0.0367792	0.0896583
Hao1	-1.10001	3.00617	69.2381	8.41348e-08	1.31736e-06
AK016061	1.09966	-0.865178	4.47098	0.0477369	0.110605
Scara3	-1.09888	5.90149	253.924	1.50894e-12	1.73694e-10
Spsb2	-1.09832	-1.62185	2.00551	0.172703	0.302418
S1pr5	1.09824	-1.67243	1.80352	0.194905	0.33095
Mink1	1.09766	-1.67213	1.81604	0.19343	0.328925
Ccng2	1.09703	-0.502625	5.47447	0.0302115	0.0759457
Gm6904	-1.0962	-0.28913	3.96689	0.0677154	0.146644
1600029D21Rik	1.09616	0.0891206	7.86965	0.011196	0.0331768
AK163333	-1.09486	-0.479423	5.35144	0.031906	0.0795372
Clvs2	1.09359	-1.02054	3.28609	0.0854916	0.175576
4930572J05Rik	-1.09215	6.66355	256.749	1.26742e-11	1.0372e-09
LOC100302567	-1.09206	-0.83518	4.0288	0.0589756	0.13158
4922501C03Rik	1.09167	6.8664	346.099	9.10676e-14	1.9468e-11
Igf2bp3	1.09116	0.0439766	9.47719	0.00611567	0.0199445
AK203176	-1.09077	-1.47998	2.2498	0.149851	0.271478
Car15	1.09048	0.150487	7.06273	0.0159431	0.0448211
Krtap1-5	1.09033	1.75066	24.9286	7.77843e-05	0.000451408
Nlrp2	-1.08964	-1.02034	3.86421	0.0639154	0.139978
Rassf2	1.08907	-1.27025	2.81915	0.109301	0.212024
Ube2l6	-1.08891	7.23033	151.184	2.53376e-06	2.35085e-05
Pla2g15	-1.08879	-0.309389	5.84937	0.0256446	0.0665413
9930111J21Rik1	1.08783	3.47646	87.8128	1.31594e-08	2.76241e-07
Faim3	1.08621	-1.27005	2.73566	0.114342	0.219728
Relt	-1.08555	-0.671547	4.67104	0.043473	0.102725
Cenpo	-1.08301	-1.47973	2.13407	0.160185	0.286191
Tmcc3	-1.08231	-0.48033	6.19257	0.0221383	0.0588874
Gm5105	1.08154	-0.54897	5.72604	0.0270546	0.0695965
Stat2	-1.08115	3.11076	55.3468	4.45799e-07	5.33685e-06
Manba	-1.08016	3.0726	53.3765	5.79245e-07	6.57377e-06
Dusp2	-1.07889	2.92628	58.1229	3.11889e-07	3.9362e-06
Tsku	1.07857	-0.597347	5.49085	0.0299937	0.0755432
AK084809	-1.07838	0.364947	11.4574	0.00306446	0.0110196
Msi1	-1.0776	0.473764	12.6458	0.00207442	0.00791316
Setd5	1.07588	-1.52559	2.14231	0.159421	0.285118
AK220028	1.07479	-1.26986	2.70627	0.116182	0.222487
Gm7168	1.07452	-1.83577	1.3611	0.257593	0.40908
Krt8	-1.07422	-1.23191	2.98607	0.0999891	0.198143
Fank1	-1.07186	-1.52588	1.79538	0.195872	0.332322
Pcdhgb8	1.07183	1.98534	32.2809	1.68956e-05	0.000120314
Gtpbp2	1.07153	-0.104783	7.70205	0.0119554	0.0351284
Man2c1	1.07074	-0.925357	3.34918	0.0827648	0.171268
Rnf214	1.06967	1.15775	19.3331	0.000301273	0.00145901
Pawr	1.06961	2.17581	35.4073	9.4451e-06	7.27481e-05
Foxo3	-1.0695	-1.52562	1.92618	0.181029	0.313176
Gp9	-1.06935	-1.43525	2.21186	0.153147	0.276227
Gypc	-1.06845	-0.597508	5.22843	0.0337088	0.0832585
ra175a	1.06768	-1.67215	1.76032	0.200105	0.337646
Zfp930	1.06761	5.2677	198.188	1.36954e-11	1.10353e-09
Dgcr6	-1.06688	1.65674	23.5212	0.000107403	0.00059811
AK038880	-1.0664	-0.270632	6.88766	0.0165722	0.0463288
Dnaja1	1.06639	-0.621541	4.53713	0.0462761	0.107888
Ifi203	1.06549	0.638787	11.6858	0.00283925	0.0103806
AK137356	-1.06512	1.7251	23.4968	0.000108017	0.000600889
6720489N17Rik	-1.06347	1.86802	29.6934	2.81299e-05	0.000186995
Ddit4	1.06331	7.79472	557.887	1.10598e-15	6.81478e-13
Amdhd1	-1.06293	0.529684	11.4661	0.00305551	0.0109912
Hist1h4n	1.06096	-1.15758	3.08437	0.0949423	0.19085
AK040143	1.06083	-1.67228	1.80202	0.195083	0.331198
Gbp9	-1.0608	3.66189	95.0289	6.98032e-09	1.62486e-07
Ttc19	-1.05994	-0.83612	4.32752	0.0510894	0.116924
Cyb5r1	1.05985	3.89424	74.2689	7.30625e-08	1.17743e-06
Rnf44	1.05975	-0.956332	3.85778	0.0641179	0.140363
Plekha4	-1.0597	-1.02034	3.45787	0.078301	0.163615
Capn11	-1.05905	-0.956275	3.5944	0.0730847	0.1553
Taf6l	-1.05892	-1.67208	1.49845	0.235678	0.382927
Zfp410	-1.05778	-0.0202035	8.19615	0.00986694	0.0297814
AK046160	1.05726	-1.67235	1.71117	0.206236	0.344774
Gdf11	-1.05703	2.43567	41.2318	3.4851e-06	3.09902e-05
Bdh2	-1.05672	-1.52516	1.95127	0.178343	0.309809
AK084265	-1.05659	0.163749	10.0337	0.00500831	0.0168363
Aox4	1.05657	0.0594363	9.11495	0.00698255	0.022198
Hbb-bh1	-1.0559	0.105258	9.35583	0.00639195	0.0206462
Scamp5	-1.05486	-1.83598	1.14673	0.297475	0.451733
Stc2	1.05448	0.815878	14.7533	0.00107975	0.00446519
Efnb1	-1.05416	-0.597506	4.66985	0.043497	0.102752
Plekha1	1.05396	0.945938	14.5341	0.00115313	0.00474149
Gsdmc4	1.05051	-1.89473	1.28059	0.271687	0.423879
Lypd5	1.04975	1.92595	29.8728	2.71285e-05	0.000181347
Zmym6	1.0496	1.39668	17.369	0.000509795	0.00231374
Ankrd44	1.04957	5.95896	225.722	4.32471e-12	4.39819e-10
AK004252	1.04953	-1.30994	2.63867	0.120549	0.228635
Zswim5	-1.04884	3.41012	75.6945	4.23577e-08	7.4073e-07
Gm12034	-1.04817	-0.310069	6.74145	0.0175977	0.048792
Ric8b	1.04805	-0.698703	4.06801	0.0578647	0.129543
Gm3168	1.04706	14.4962	1040.65	3.15688e-18	1.10228e-14
Myf6	1.0465	-1.39221	2.2943	0.146094	0.266219
1600002H07Rik	-1.04644	-1.39244	2.42929	0.135373	0.25095
Adh1	1.0463	0.679551	13.5526	0.00155729	0.00613546
Dtnb	-1.04554	0.497127	10.1333	0.00483464	0.0163417
Cdk5rap3	-1.04455	-1.39198	1.94823	0.178666	0.310071
Adcy1	-1.04438	-1.67229	1.75921	0.200242	0.337704
BC144936	-1.04438	-1.67229	1.75921	0.200242	0.337704
Dnase1l1	-1.04409	-1.52541	1.98403	0.17491	0.305161
Bbs12	-1.04365	-1.27045	2.74247	0.113921	0.219119
Zeb2	-1.04235	-0.835707	4.02809	0.058996	0.131598
Trpt1	-1.04212	-0.597461	5.21453	0.0339197	0.0836808
Zhx1	1.04181	-0.105022	8.02379	0.0105451	0.0315419
Ccl9	1.04163	3.28196	62.7773	1.76281e-07	2.41124e-06
E230008N13Rik	-1.04057	1.83715	29.8679	2.71556e-05	0.000181413
Klhl5	-1.04003	0.944267	14.1862	0.00128126	0.00518794
1810011O10Rik	1.03978	5.42058	53.7415	0.000285907	0.00139471
Ppbp	1.03924	0.0752928	9.05101	0.0071494	0.022639
D230037D09Rik	-1.03865	1.28681	16.825	0.000592958	0.00263747
Gig18	1.03736	-0.270367	5.94274	0.0246322	0.0644412
Cntrob	1.03685	-0.232145	6.41739	0.0201355	0.0545575
Fam123b	1.03624	4.53086	103.731	4.08476e-09	1.06723e-07
BC061194	1.03513	-1.30998	2.4093	0.136899	0.253091
Ube2g1	-1.03421	-1.6722	1.45565	0.242239	0.390918
Aloxe3	-1.03163	-0.864906	3.73272	0.0682067	0.147556
Tmprss11bnl	-1.03124	-1.05261	2.37785	0.139627	0.257272
Psen1	1.03083	-1.43554	1.87957	0.186153	0.319334
Pdk1	1.03066	-0.0198014	8.37277	0.00922221	0.028164
Ap3b2	1.03033	-1.19438	2.31487	0.144395	0.263877
Lin7c	1.02931	8.39866	372.781	5.32792e-13	7.54188e-11
Fnip1	1.02922	7.04218	180.001	5.67477e-08	9.3759e-07
AK020619	1.0272	-1.23221	2.21693	0.152701	0.275587
Ucn2	-1.02693	-1.39246	2.36392	0.140442	0.258274
Parp16	-1.02685	-1.27019	2.68509	0.11753	0.224211
Git2	1.02613	1.91696	29.1653	3.13218e-05	0.000204294
Pcdhga1	1.02603	1.69099	26.3738	5.64706e-05	0.000341343
Erbb3	1.02597	2.46054	43.9183	2.27395e-06	2.14785e-05
Cntf	-1.02585	-0.140065	6.61972	0.0185062	0.0508399
BC005764	-1.0255	-1.15793	2.77436	0.111972	0.216087
Pcdh1	-1.02533	7.55239	416.596	1.65931e-14	4.57114e-12
AK187054	-1.02516	9.09924	656.506	2.41656e-16	2.53134e-13
Thap2	1.0249	1.62888	24.526	8.52103e-05	0.000488816
Pja1	-1.02169	0.860767	13.289	0.00169109	0.00660976
Dhx40	1.02167	2.73702	45.607	1.75519e-06	1.7087e-05
AK077492	-1.0213	-1.08716	3.01056	0.098703	0.19645
Lims2	-1.01986	4.08172	90.5985	1.02511e-08	2.24177e-07
1600014C10Rik	-1.01974	0.206362	9.17111	0.0068396	0.0218363
mKIAA0397	-1.01934	-1.39254	2.30705	0.145039	0.264766
Cd53	-1.01778	2.7221	49.6284	9.73149e-07	1.0328e-05
AK053708	-1.01679	-0.646679	4.41759	0.0489543	0.112976
Adam15	1.01661	-1.57282	1.91049	0.182735	0.31508
Slco6d1	1.0159	-0.865066	3.04347	0.097005	0.193696
AK039809	1.0149	-1.39207	2.08535	0.164794	0.291854
Mzf1	1.01469	-1.19408	2.66528	0.118807	0.226117
Tmem204	1.01366	-0.502425	5.50868	0.0297587	0.0750776
4930426L09Rik	1.01322	-0.894456	3.6424	0.0713478	0.152667
Slc7a11	1.01304	6.91131	359.948	6.35934e-14	1.44813e-11
Chd2	1.01228	7.91848	293.18	3.36316e-11	2.3177e-09
Cep72	1.01184	0.0120439	7.47832	0.0130606	0.0379289
Pdzd8	1.01138	8.85886	609.379	4.85152e-16	3.62998e-13
Myo1g	1.01119	1.86842	25.5416	6.78148e-05	0.000399852
AK085438	1.01056	-0.251276	6.11416	0.0228889	0.0605306
Snx12	1.0096	6.30775	229.851	3.67959e-12	3.7788e-10
Tex19.1	1.00946	-1.8358	1.07394	0.312898	0.468297
4930486L24Rik	-1.00931	2.82241	43.9752	2.25396e-06	2.13281e-05
Ptpn14	-1.00922	-1.67221	1.26335	0.274837	0.427392
H2-K2	-1.00773	4.65055	136.276	3.50987e-10	1.53191e-08
Prss16	1.00718	0.275197	9.99503	0.00507749	0.0170197
Ddx5	1.007	4.03463	16.0917	0.0131004	0.0380234
Il1r1	1.00621	1.20018	16.9684	0.000569671	0.00254687
Suz12	1.006	0.0594717	7.90638	0.0110369	0.0327739
AK035979	1.00594	-0.988031	3.41905	0.0798623	0.166281
Prune2	1.00534	6.73428	265.181	1.02152e-12	1.24423e-10
Fgf11	1.00469	-0.525236	4.80869	0.0407917	0.0975925
Sumo1	1.00442	6.67905	326.66	1.54371e-13	2.83691e-11
Ugcgl1	1.00422	-1.57315	1.26034	0.276091	0.428574
Fbxl16	-1.00417	0.376747	8.34475	0.00932127	0.0284169
Bcl2	1.00412	6.1858	78.7309	5.0344e-05	0.000307854
Sfrs16	1.00321	0.640035	10.866	0.00374566	0.0130917
Prpf18	1.00238	6.83009	41.8928	0.0041567	0.014304
Ccne1	-1.00108	6.85201	301.508	3.19964e-13	5.32003e-11
Ptprg	1.00046	-0.121893	6.87158	0.0166816	0.0465973
Psmb8	-0.998626	5.41981	158.53	9.6104e-11	5.41231e-09
Asph	-0.998244	0.938368	12.183	0.00240996	0.00900298
Gjc1	-0.997713	-1.43544	2.14381	0.159283	0.28492
1200014J11Rik	-0.997246	-1.67257	1.59168	0.222157	0.365321
Acad11	0.996402	4.32955	118.725	1.12057e-09	3.83595e-08
Tcfe3	0.995437	-1.3102	1.79088	0.196409	0.332964
4632415L05Rik	0.9952	5.16408	185.455	2.45498e-11	1.76136e-09
4930519F16Rik	-0.994868	-1.19407	2.57466	0.124865	0.235286
1110059M19Rik	0.994176	1.39632	18.6559	0.000359977	0.001707
LOC100272221	0.993763	-1.43544	2.03301	0.169927	0.298506
Mocos	-0.993502	-1.72521	1.3413	0.260969	0.412503
Tmem121	-0.993409	3.27389	58.7651	2.87688e-07	3.68402e-06
RP23-282C23.3	0.993356	0.403194	9.68475	0.0056735	0.0187063
Cyp2c65	-0.992433	-1.1945	2.68821	0.11733	0.223948
AK153351	-0.992365	-1.52578	1.80672	0.194526	0.330458
Parp10	-0.991766	-0.413651	5.45277	0.0305029	0.0764905
Ptgis	-0.991504	1.11358	14.3437	0.00122142	0.00498221
Osgin2	0.990611	-0.23269	4.59447	0.0455393	0.106502
Erbb2ip	0.990557	-1.57276	1.84582	0.189976	0.32421
Pla1a	-0.989654	0.739161	12.2734	0.00233993	0.00878523
Hoxa4	-0.989401	-1.19457	2.02902	0.170327	0.299057
Itpk1	-0.989222	5.81653	215.817	6.44494e-12	6.02775e-10
Golim4	-0.988862	-1.39227	2.07715	0.165585	0.29283
Zfp329	0.988126	2.82911	40.514	3.91917e-06	3.40975e-05
Mapk9	0.988018	-0.290377	5.16663	0.034658	0.0852014
Fam65b	0.987129	-1.72445	1.25467	0.276441	0.428868
Hspbap1	-0.987066	-1.15769	2.58439	0.124197	0.234365
Zbtb42	-0.986896	1.12802	16.307	0.000686332	0.00299306
Smap1	-0.986736	-0.621451	4.05846	0.0581329	0.13006
Slamf9	0.985316	-1.23214	2.46049	0.133031	0.247381
Snord42a	-0.985103	-1.19439	2.20281	0.153946	0.277506
Otog	0.984982	-0.865325	2.82732	0.108822	0.211279
Stat5b	-0.984471	-0.724974	2.71502	0.11718	0.223881
Slco2a1	-0.984368	0.340328	9.53372	0.00599154	0.0196129
Pde4dip	0.9841	7.71296	465.691	5.92584e-15	2.2169e-12
AK086460	0.983551	-1.19415	2.69668	0.11679	0.223243
9330129D05Rik	0.983251	1.37827	18.56	0.000369266	0.00174788
Pmepa1	-0.983046	6.47701	245.678	2.02894e-12	2.26097e-10
Ankrd34a	-0.982653	-0.413252	3.96909	0.0611177	0.135179
2810025M15Rik	-0.982331	6.42824	297.732	3.58726e-13	5.58857e-11
5830416P10Rik	-0.981148	2.72227	43.5231	2.4185e-06	2.26396e-05
Adpgk	0.980195	-0.392035	5.70473	0.027307	0.0701081
Fndc4	-0.979979	1.05116	15.3522	0.000904309	0.00382269
Clpb	0.979908	3.88269	91.3906	9.55956e-09	2.10814e-07
AK219219	-0.979795	2.42707	37.9105	6.07503e-06	4.94068e-05
AK016335	0.97936	-1.08757	2.58185	0.124371	0.234567
Etl4	0.979322	0.768886	12.204	0.00239344	0.00895404
Parp14	-0.978375	-1.30956	2.33902	0.142432	0.261292
Zfp773	0.978048	0.0289228	7.12949	0.0150201	0.042523
Igsf8	-0.977239	1.18443	16.749	0.000605744	0.0026867
Gm5431	0.977132	1.30151	17.7412	0.000460361	0.00211411
Cln3	-0.977009	-1.19486	2.18912	0.155165	0.279174
AK049416	0.976333	-0.121601	5.87986	0.0253089	0.0658538
AK030770	0.975659	-1.30976	2.32263	0.143761	0.263216
Crb2	-0.975214	-1.30992	2.34653	0.141828	0.26032
AK006108	-0.97511	1.80023	25.6165	6.6697e-05	0.000394718
AI428936	-0.975106	-0.725204	3.98917	0.0601236	0.133431
Nexn	-0.975036	2.08972	28.048	3.94824e-05	0.000248993
Plxnb2	-0.974643	-0.0880591	6.21765	0.0219041	0.0584276
Lgr4	-0.974421	5.0612	161.605	8.14061e-11	4.71121e-09
DQ716436	0.973846	6.62292	273.389	7.76081e-13	1.04224e-10
Ogg1	-0.972106	-0.25089	5.96339	0.0244145	0.0639354
Cd300lb	-0.97204	1.89331	23.1754	0.000116465	0.000643108
Shpk	0.971649	-1.57266	1.65079	0.214094	0.354847
Rgs16	0.97147	1.92719	17.6241	0.000571527	0.00255298
Aptx	0.971119	-0.549515	4.23823	0.0533124	0.121165
3110070M22Rik	-0.970712	0.508928	10.7346	0.00391896	0.0135976
Nusap1	0.970633	2.75126	42.1463	3.00714e-06	2.72725e-05
Slc25a43	-0.969968	-1.43529	2.0165	0.171587	0.300816
Cldnd1	0.969761	-0.310023	5.76626	0.0265853	0.0685239
Ccdc34	0.96891	-1.47987	1.69888	0.207806	0.346784
AK053790	0.96874	-0.925516	3.11554	0.0934049	0.188592
Pgm3	-0.968256	-1.39255	2.05655	0.167595	0.295449
Tmem87b	0.967385	-1.43521	1.75939	0.20022	0.337704
Ints10	0.966529	-1.0872	2.20285	0.153943	0.277506
Znf326	0.966401	-0.0537873	5.58193	0.0288147	0.0731186
Arhgap6	0.966101	-0.212947	6.40594	0.0202324	0.0547352
Ubl4	-0.965984	-1.57278	1.47386	0.23942	0.387443
Ptprf	0.965176	1.68179	18.2491	0.000401274	0.00187733
Fgf7	0.964787	3.58287	77.4751	3.53469e-08	6.30797e-07
Ankrd55	0.964366	-1.57272	1.33344	0.262325	0.413958
AK134928	-0.964292	-1.57285	1.47544	0.239176	0.387108
AA415398	0.962931	0.639122	11.5604	0.00296047	0.0107304
OTTMUSG00000016325	0.962872	1.66125	22.6799	0.000130959	0.000709304
Ptger1	0.962762	0.0438442	7.04838	0.0155217	0.0437774
Snora30	0.962077	-1.57243	1.32783	0.263299	0.414807
Adam1a	0.962039	-0.250684	6.17428	0.0223109	0.059243
Ndrg1	0.962001	9.17744	538.109	1.54802e-15	9.0086e-13
Gbp10	-0.961222	-0.139679	6.59576	0.0186911	0.0512136
Klhl38	0.960709	-0.27011	6.05035	0.0235211	0.0619053
Snord38a	-0.960647	-1.30977	2.17278	0.156635	0.281287
Snord68	-0.960072	-0.251639	4.74055	0.0420947	0.0999937
Dusp23	0.959965	0.904713	12.9657	0.00187287	0.00722325
Ctns	0.959373	-1.05336	2.84018	0.108073	0.210148
Des	0.959236	1.21337	12.6207	0.00209124	0.00796862
AK159035	-0.958775	-1.12286	2.47722	0.131795	0.245417
6720401G13Rik	0.958719	2.00364	21.4878	0.000174726	0.000905172
Ybey	0.958454	4.04785	93.1814	8.17828e-09	1.8583e-07
Them4	0.958335	3.97907	82.2929	2.20223e-08	4.27983e-07
Enthd1	-0.957933	1.70164	17.2927	0.000520642	0.00235684
Trps1	-0.957665	-1.30926	1.9324	0.180359	0.312274
Ninj2	0.95738	-1.23197	1.90068	0.183811	0.316368
Rab36	-0.95655	-0.779679	3.76668	0.0670672	0.145541
AK043285	-0.956335	-0.725071	3.38446	0.0812843	0.168772
Rdh5	0.955939	-1.43532	1.8811	0.185982	0.319267
Rbbp9	0.955824	5.34745	178.449	3.43852e-11	2.35415e-09
Chrna2	-0.955449	-0.549076	4.06587	0.0579246	0.12965
Mrpl3	-0.955332	-0.435306	5.23021	0.033682	0.0832317
BC031361	0.95531	1.52029	19.8435	0.000264028	0.00129784
Zmynd12	-0.954903	-1.57242	1.4509	0.242982	0.391394
Nisch	0.953705	4.36878	78.4849	4.68121e-08	8.02547e-07
Zfp398	-0.953306	-1.31031	1.66205	0.2126	0.352929
DQ695529	0.952555	0.427592	9.68542	0.00567214	0.0187063
Endog	-0.952548	2.12658	29.4812	2.93669e-05	0.000193714
Spna1	0.952487	-0.752048	3.73	0.068299	0.147725
Iqcb1	-0.952476	-0.925364	2.77403	0.111992	0.216087
Mt2	0.951766	9.16407	38.7371	0.0103295	0.0309766
Qtrtd1	0.951688	-0.350134	5.51571	0.0296666	0.0748814
Rbm39	0.950889	-0.621253	4.35346	0.0504638	0.115796
AK142089	0.950082	-0.480166	3.76804	0.067022	0.145474
Fem1b	0.950079	7.91276	454.674	7.39634e-15	2.58256e-12
Clic5	0.950022	5.46066	162.784	7.64406e-11	4.46852e-09
AK220016	-0.949903	8.39228	407.262	2.04475e-14	5.35468e-12
1700029I15Rik	0.949808	-0.835506	2.49781	0.130775	0.243923
A530099J19Rik	0.949762	2.13957	29.4029	2.98388e-05	0.000196209
Eppk1	-0.949494	2.0297	22.4173	0.000139441	0.000748281
Efna2	-0.949368	1.79049	21.9552	0.000155882	0.000823014
Brcc3	0.948732	0.378591	9.50108	0.00606286	0.0198216
Odz3	-0.948568	-0.955794	2.31514	0.144374	0.263877
Trim24	0.948566	-0.158041	6.07931	0.0232318	0.0613207
Cdk5r1	-0.948253	0.134425	6.5106	0.0193656	0.0527444
Slit3	0.947137	8.48382	473.67	5.06271e-15	2.12128e-12
Matn2	-0.946151	3.30174	57.8183	3.24145e-07	4.06049e-06
Zfp456	0.945929	-1.95632	0.879815	0.35987	0.51646
Anxa8	0.945337	-0.413792	5.21288	0.0339448	0.0837231
Rgs19	-0.945114	-1.19435	2.42822	0.135453	0.25095
Psmb10	-0.944912	6.41424	205.42	1.1913e-11	9.90384e-10
Msh4	0.94476	-1.30967	2.1633	0.157495	0.282446
Dpy19l1	-0.94476	0.438771	9.22197	0.00671296	0.0215172
Fez2	0.94464	-1.35084	1.65179	0.213961	0.354739
AK155877	-0.944462	-0.457458	4.75616	0.0417921	0.0994084
Snord57	-0.944267	1.22646	13.8049	0.00144018	0.00573826
Eif4ebp2	0.943168	6.48222	258.73	1.27493e-12	1.50055e-10
8430429K09Rik	-0.943027	-0.807717	1.74801	0.209875	0.349625
Bmp2	-0.942362	3.07688	44.1	2.21071e-06	2.09757e-05
Tctn1	0.941959	-1.72519	1.04026	0.320405	0.4769
Angptl6	0.941641	5.24668	64.7114	1.59637e-05	0.00011477
Prpf3	-0.941442	-0.0880356	5.91514	0.0249267	0.0650978
Zfr2	0.941411	0.234965	8.17949	0.00993031	0.0299214
Ubr2	0.940637	-1.35068	1.55688	0.227085	0.371683
AK079994	-0.940356	-1.57297	1.61013	0.2196	0.362139
Tcf9	-0.940064	-1.1944	2.45334	0.133563	0.248063
mKIAA0737	0.939184	-1.47969	1.73736	0.20294	0.341056
Fgd6	0.938633	6.14566	208.402	8.78607e-12	8.07316e-10
Manf	-0.938161	2.52029	36.3671	7.95546e-06	6.26929e-05
AK042300	-0.937985	-1.39269	1.93845	0.17971	0.311356
AK011326	-0.937924	-1.23171	2.33101	0.14308	0.262297
Epn1	-0.936747	1.21945	12.2013	0.00239557	0.00895879
ADD1	-0.936335	-0.0533516	6.62095	0.0184968	0.0508273
Pfkfb2	0.93562	4.13474	96.8435	5.98958e-09	1.44564e-07
Fst	-0.935189	-0.157539	5.81776	0.0259978	0.067313
AK048775	0.934349	-0.622409	3.07336	0.0954925	0.191699
0610039K10Rik	-0.934058	-1.43532	1.71823	0.205341	0.343932
Dhrs3	0.934051	-1.35005	1.58825	0.222636	0.365937
AK078239	-0.933399	1.22859	15.3402	0.000907496	0.00383462
C230096C10Rik	-0.932127	-0.621353	4.07291	0.0577275	0.129291
Cda	-0.931939	3.52642	55.1773	4.55826e-07	5.43825e-06
Met	0.931826	7.60157	344.477	9.50642e-14	1.95254e-11
Tnfsf10	-0.931328	-1.30979	2.07025	0.166255	0.293581
Vps28	0.93129	-0.698192	3.9446	0.0614455	0.135818
AK045371	-0.931185	0.134368	6.40244	0.0202622	0.0548015
Itga2	0.930902	-0.15757	6.26207	0.0214961	0.0575298
Lyz2	-0.929901	-0.835915	3.36693	0.0820159	0.170013
B4galt5	-0.928793	7.59925	370.237	4.91134e-14	1.16923e-11
Ap1g2	-0.928644	-0.502401	4.62723	0.0443682	0.10437
AK131952	0.927871	-0.779349	3.54562	0.0749007	0.158182
Gimap9	0.927111	0.327696	8.57103	0.00855403	0.0264239
AK050164	0.925888	-0.549118	4.16361	0.0552554	0.125092
Kiaa1328	-0.924885	-1.08732	2.27395	0.147798	0.268409
5830427D03Rik	-0.924794	-0.289582	5.07076	0.0361912	0.0884514
Yes1	-0.924768	0.542074	9.95421	0.00515175	0.0172246
AK044020	-0.924458	-1.23203	2.03717	0.169512	0.297976
Cep290	0.92367	5.63832	179.129	3.32616e-11	2.30739e-09
Fam189a1	-0.92237	-1.12163	2.38926	0.13845	0.255598
Sft2d2	0.92226	2.04911	25.8694	6.30706e-05	0.000376018
Unkl	0.922205	3.80866	71.8455	6.33922e-08	1.03432e-06
AK080222	-0.921834	-0.925095	2.90417	0.104436	0.204786
Ogn	0.921719	0.648172	6.40293	0.0220993	0.0588286
Col6a3	-0.921648	-1.0203	2.78119	0.11156	0.215568
Gm5077	0.921173	2.18392	12.8698	0.00424034	0.0145488
E130317F20Rik	-0.920484	-0.122157	5.68914	0.0274934	0.0704656
Tnfaip8l2	-0.920407	-1.57338	1.36054	0.257689	0.40917
Tnfsf9	-0.920387	4.35117	77.7734	3.43027e-08	6.18452e-07
Rnf38	-0.920377	-1.30977	2.08643	0.16469	0.291751
Slc23a3	0.920243	-1.35009	1.88598	0.185438	0.318554
Sox2	-0.919661	5.79195	184.394	2.58157e-11	1.82716e-09
BC108341	-0.919388	-1.52637	0.821425	0.381164	0.536507
Fam154b	-0.919102	-1.19448	2.3068	0.145059	0.264766
Gm6034	-0.918823	-1.57257	1.30266	0.267724	0.41967
Scarf2	-0.918563	-0.43518	4.29116	0.0519815	0.118709
Bnc1	-0.918088	-0.41356	4.66222	0.0436516	0.103054
BC099422	0.917072	1.87768	18.4588	0.000379361	0.00178679
AK014089	0.916927	-1.15803	1.98915	0.174381	0.304593
C030030A07Rik	-0.916714	-1.08798	2.16521	0.157321	0.282182
Uqcr	-0.916228	0.927943	11.2005	0.00334172	0.0118619
Plekho1	-0.915534	6.35921	230.22	3.62733e-12	3.7788e-10
Lin54	0.914246	-1.0203	2.68943	0.117252	0.223881
AK019262	0.914143	-1.12221	2.42345	0.135816	0.251443
AK034519	-0.913814	-1.15801	2.04142	0.16909	0.297584
AK163149	-0.912793	0.163416	7.44919	0.0132127	0.0382965
AK151815	0.91279	-0.86529	3.0002	0.0992446	0.197041
AK145614	-0.912715	-0.392575	5.00542	0.0372804	0.0906903
Cdkl3	-0.911848	-1.89449	0.907138	0.352679	0.509004
Ccdc155	0.911431	-0.392354	4.97915	0.0377288	0.0915684
Kiaa0892	0.910774	0.0118495	6.25669	0.0215451	0.0576315
1190007I07Rik	0.910723	-1.62186	1.25961	0.275526	0.428146
Sphk2	0.91026	2.25331	28.2901	3.75318e-05	0.000238125
Mir1905	0.909559	-0.955667	2.10939	0.162701	0.289452
AK004186	-0.909328	2.17938	22.7182	0.00012977	0.000703956
Dus1l	-0.908919	1.42579	14.177	0.00128486	0.00520052
AK042010	0.908761	-0.865397	2.41751	0.136269	0.25206
Neil3	0.908131	4.31893	97.8498	5.50787e-09	1.35117e-07
Jak3	0.907638	-1.15788	1.85456	0.188976	0.32291
AK191425	0.90731	0.700164	8.27701	0.0095657	0.0290017
1190005F20Rik	-0.907171	-1.43583	1.56815	0.225474	0.369554
AK078979	0.907068	0.352846	7.4877	0.013012	0.0378297
Cnot10	0.906992	1.70632	20.8307	0.00020562	0.00104658
Cyp2ab1	0.906712	-0.0205554	6.22663	0.0218209	0.05828
Ifrg15	-0.906548	-0.67193	3.17056	0.090762	0.184179
Nfix	0.905206	0.0755751	5.84558	0.0256866	0.0666172
5033411D12Rik	-0.905195	-0.549767	4.11585	0.0565416	0.127313
AK167137	0.904667	-1.4798	1.64976	0.214231	0.355019
Sod3	0.904318	-0.573139	3.76583	0.0670956	0.145573
Setd8	0.902637	-0.12208	6.19449	0.0221203	0.0588545
Larp7	0.90263	7.00289	299.471	3.40266e-13	5.40043e-11
6030408B16Rik	0.902311	-1.62162	1.20011	0.286814	0.440783
Incenp	0.90189	-0.00384347	6.49608	0.0194833	0.0530236
Nono	-0.901603	-0.549109	3.4989	0.0766893	0.161212
Rbm5	0.900384	2.16944	27.0462	4.88305e-05	0.000299648
Ebpl	-0.899813	3.75629	70.0368	7.7078e-08	1.22877e-06
Stx2	0.899625	2.00607	23.4979	0.000107988	0.000600889
Fam49b	-0.899323	-1.1947	2.12298	0.16122	0.287501
Kifc5b	0.898437	3.94024	61.7981	1.98209e-07	2.66185e-06
Mmp14	-0.897984	7.96902	311.501	2.37933e-13	4.15391e-11
Bbs4	0.896877	3.69757	59.0533	2.77507e-07	3.57111e-06
Gbx1	0.896672	2.88413	40.5435	3.9002e-06	3.39606e-05
Snord33	-0.89627	0.747456	8.55163	0.00861696	0.0265869
Gm5177	0.895636	-1.39246	1.5262	0.231545	0.377441
Adamtsl5	-0.895538	1.42081	15.6261	0.000834792	0.00356189
Zmat3	0.895029	8.28176	88.639	0.000154445	0.000815842
Fmod	-0.894955	-0.0363646	4.73878	0.0421292	0.100046
Lrch1	-0.894603	-0.924963	2.8614	0.10685	0.208195
AK029503	0.894422	0.0589345	6.02451	0.0237826	0.0624524
Ptgs1	0.894354	9.18069	428.8	1.27123e-14	3.80461e-12
Agpat3	-0.894062	-1.08756	2.18308	0.155707	0.279909
Cd248	-0.894042	2.44647	29.563	2.8883e-05	0.000190883
AK160668	0.893788	3.43637	58.2516	3.06865e-07	3.89625e-06
Bmp6	0.893606	1.83808	20.4495	0.000226281	0.00113738
Lnp	0.893073	0.0900778	6.29626	0.021188	0.0568358
Ckap4	-0.89271	8.98538	479.08	4.55677e-15	1.99282e-12
Snx13	-0.891839	-1.47942	1.48641	0.237501	0.385171
Yy2	0.890409	-0.646228	3.56494	0.0741755	0.156874
Rhod	-0.890262	1.87251	22.4809	0.000137333	0.000737935
Pkp2	-0.890002	-0.350856	4.55922	0.0457999	0.106992
Prkd2	0.889681	1.36557	14.8078	0.00106231	0.00439754
AK052711	-0.889252	-1.47981	1.61694	0.218665	0.361053
Ccdc80	-0.888408	0.564442	9.41817	0.00624833	0.0202824
AK083252	0.887799	-0.752366	2.87355	0.106158	0.207154
Xdh	0.887794	-1.12287	1.88032	0.186069	0.319334
Chst1	-0.886891	7.63392	330.422	1.39066e-13	2.60129e-11
AK087617	0.88634	3.72039	64.5282	1.43441e-07	2.07248e-06
AK005951	-0.886311	-1.15772	1.89162	0.184811	0.317725
AK021003	-0.886246	-0.83595	3.05328	0.0965054	0.192919
Def8	-0.886069	-0.45773	4.36576	0.0501703	0.115274
Fcho1	0.885725	0.474688	8.75494	0.0079823	0.0248853
2010321M09Rik	-0.885237	-0.698676	3.36085	0.0822715	0.17045
AK158379	-0.884175	0.0738162	6.01964	0.0238323	0.0625672
Gsn	-0.884045	-0.835972	2.8752	0.106064	0.20701
Fyn	0.883926	0.628867	9.62191	0.00580349	0.0190868
Etohi1	0.883143	3.41221	58.6595	2.91519e-07	3.72398e-06
Abcd4	-0.882236	0.628427	9.4927	0.00608133	0.0198696
E230025N22Rik	-0.88207	1.17165	12.807	0.00197	0.00755888
Tmem132b	0.88191	-1.7249	1.17793	0.29118	0.445133
Slc7a6	-0.880335	0.858966	10.9836	0.00359772	0.0126421
1700065D16Rik	0.88015	-1.8946	0.90723	0.352655	0.509004
AK080025	-0.880116	-1.77947	0.999656	0.329794	0.48581
BC048507	-0.879745	0.134838	6.76611	0.0174198	0.0484013
Wnt10a	-0.879563	5.36284	122.793	8.45362e-10	3.06407e-08
Adrb2	0.879447	2.74361	26.1752	7.0211e-05	0.000412448
Cyp3a13	-0.879344	1.40977	12.1957	0.00239999	0.00897213
Akap3	0.878441	-1.23205	1.67224	0.21126	0.351286
AK158083	-0.878359	1.20688	13.7955	0.00144436	0.00575054
Crry	0.877919	-1.27028	1.92731	0.180908	0.313069
Ern1	0.877862	-0.865239	2.92918	0.103054	0.202949
Hist1h2bj	0.877528	-0.724466	2.89454	0.104974	0.205533
AK017883	-0.877336	-0.435695	3.83708	0.0647746	0.141504
AK144632	0.877334	0.887768	10.3091	0.00454435	0.0154703
Socs1	-0.877129	3.64324	48.9158	1.07753e-06	1.12646e-05
Kdm6b	0.877047	4.70447	88.9857	1.18365e-08	2.53553e-07
Trp53inp2	0.876946	4.66718	99.3613	4.86268e-09	1.23035e-07
Eif2ak2	-0.87694	8.29574	415.453	1.7019e-14	4.57114e-12
Tctex1d4	0.876933	-0.572655	3.82996	0.0650023	0.141824
Top2a	0.875702	8.69331	303.521	8.67792e-13	1.12224e-10
Rnd3	0.875275	6.28003	201.436	1.18657e-11	9.90384e-10
Kif18b	0.874943	7.2021	134.678	2.7356e-07	3.52465e-06
Cd80	0.874421	4.11973	75.6708	4.24609e-08	7.41297e-07
Bsg	-0.874343	0.486403	8.04321	0.0104662	0.0313327
Mogat2	-0.873225	-0.924774	2.26024	0.148959	0.270049
Gcc1	0.873199	0.920727	10.0757	0.00493422	0.0166193
Sbno2	-0.872282	0.104459	6.22298	0.0218547	0.0583404
Lgi4	-0.871988	-1.0203	2.46992	0.132332	0.246301
1110020A21Rik	0.871739	-0.864848	2.90485	0.104398	0.20475
Lrrc48	0.871337	1.91203	19.6772	0.000275577	0.00135017
AK085201	0.8712	3.43087	36.0401	1.4477e-05	0.000104946
Parvb	-0.870764	8.90113	354.609	7.29194e-14	1.62517e-11
AK199694	-0.870644	2.44188	29.191	3.11579e-05	0.000203605
Tstd1	0.870245	-1.23175	1.86794	0.187459	0.321066
Plk2	0.870124	8.32427	424.462	1.39633e-14	3.95311e-12
AK141620	0.869827	-1.62178	1.21814	0.283329	0.436551
Gpt2	0.869387	0.164105	6.48041	0.0196113	0.0533026
Rbpms2	-0.869364	-0.726201	2.49489	0.130504	0.243605
A630052C17Rik	0.868469	0.414422	6.26533	0.0214666	0.0574659
Zfp931	0.867595	0.796872	10.3295	0.00451202	0.0153702
AK154113	0.867522	-0.865127	2.88608	0.105449	0.206194
Tln2	-0.867485	-0.549372	3.50435	0.0764781	0.160897
Mmp19	0.866713	-1.0876	2.21869	0.152547	0.275458
Nov	0.866665	-0.672161	3.45981	0.0782239	0.163487
Wdfy2	0.866444	0.0748966	6.36694	0.0205665	0.0554528
Gpr141	0.866036	7.02773	221.258	5.16593e-12	5.15363e-10
Nceh1	0.865935	6.45154	179.139	3.32456e-11	2.30739e-09
Plag1	0.865106	4.69044	99.0736	4.97878e-09	1.25367e-07
Ucp2	-0.865067	5.69036	156.378	1.0813e-10	5.89927e-09
A430110N23Rik	-0.864832	4.32585	59.1456	4.60997e-07	5.48121e-06
Vmn2r13	-0.864757	-1.05304	2.13769	0.159849	0.285737
Ppip5k2	0.864322	0.649804	9.12729	0.00695087	0.0221241
Tppp3	-0.863788	-0.808083	2.9451	0.102185	0.201618
Ccdc24	-0.863651	-0.104141	5.48367	0.030089	0.0757079
Inpp4a	0.863435	3.40521	55.0087	4.66053e-07	5.51627e-06
H2-T9	-0.863357	5.19973	132.877	4.34792e-10	1.80166e-08
Rps19	-0.863145	1.48978	15.0835	0.000978767	0.00409939
F830016B08Rik	-0.86313	-0.572243	3.11474	0.093444	0.188616
Caprin2	-0.86301	-0.479053	3.12799	0.0927992	0.187478
Gatsl3	-0.862604	4.58855	97.3664	5.73372e-09	1.39676e-07
Wdr61	-0.862405	0.192856	6.62632	0.0184556	0.0507407
Tnr	0.862108	-0.371123	4.51071	0.0468534	0.108967
Dcaf8	0.861536	1.57018	15.6822	0.000821317	0.00350868
S60130	-0.86111	-1.47951	1.49367	0.236399	0.383682
AK158295	-0.860882	0.824656	9.36122	0.00637939	0.0206145
Parp8	0.860585	-1.52522	1.24166	0.278868	0.431548
Zfp759	0.860533	3.69182	61.8068	1.98003e-07	2.66185e-06
Nanp	-0.860109	1.70991	17.3855	0.000507484	0.00230625
Hist1h2ba	0.860059	-0.525638	3.8276	0.0650782	0.14196
AK087886	0.86005	-1.62172	1.1061	0.305951	0.461062
Cryba4	0.859616	-1.27051	1.67057	0.211479	0.351516
Sin3b	0.859582	0.221271	6.87176	0.0166804	0.0465973
A730008H23Rik	0.859117	2.19619	23.7135	0.000102704	0.000576169
B930059L03Rik	0.859103	-0.231512	4.95237	0.0381921	0.0924765
BC125332	-0.858846	-1.62201	1.10988	0.305149	0.460317
Tm9sf4	-0.858713	-1.47969	1.22258	0.28248	0.43572
Col7a1	-0.857856	4.05643	69.6847	8.01045e-08	1.2637e-06
D4Wsu53e	0.857427	3.58374	6.57875	0.0693826	0.149667
Ccdc88b	-0.857204	0.748336	9.48603	0.00609607	0.0198929
Il6st	0.856195	8.6122	404.301	2.18695e-14	5.58739e-12
Supt4h1	0.855655	-0.0705808	5.60683	0.0285014	0.072517
BC094334	0.855093	5.4111	125.177	7.19382e-10	2.73026e-08
Snx30	-0.854615	5.9631	144.799	2.09319e-10	1.00314e-08
Cybrd1	0.854547	-0.955801	2.3227	0.143756	0.263216
Kbtbd4	-0.854375	0.720549	7.48565	0.0130226	0.0378416
Pram1	-0.854348	-1.1949	1.54471	0.228841	0.374001
Wnk4	0.853838	-1.19415	2.05018	0.168222	0.296305
Gm3414	0.853388	4.97537	122.197	8.80542e-10	3.16965e-08
Ndufa4l2	0.852903	-0.479583	3.90257	0.0627228	0.138001
Taf5	0.852808	4.81383	117.031	1.26323e-09	4.24113e-08
Adam4	-0.852659	-0.47988	4.01944	0.0592445	0.132012
RP24-180B11.5	-0.852624	-0.865503	2.57578	0.124788	0.235214
Rb1	0.852563	6.23296	217.697	5.96724e-12	5.76303e-10
Mir142	0.852417	-1.62182	1.25002	0.277305	0.429827
Paqr3	0.85213	3.8795	48.5311	1.50638e-06	1.49709e-05
Ces2g	0.851807	1.87979	19.6736	0.000275832	0.00135079
Dyrk4	0.851248	-0.392177	4.35593	0.0504048	0.115707
Thrb	0.851109	-0.835749	2.81932	0.109292	0.212024
Ctsk	0.851056	-1.39242	1.61944	0.218323	0.360545
Mir568	0.850547	-1.47946	1.43947	0.244781	0.393505
Ifi205	-0.850497	2.67824	31.318	2.03602e-05	0.00014171
Dock11	0.850424	7.60881	292.484	4.21484e-13	6.04801e-11
Fbxo48	0.849643	1.01951	10.1919	0.00473559	0.0160328
Cxcl1	0.849021	2.39701	28.642	3.48847e-05	0.000224045
Usp15	0.848841	-1.15776	2.09539	0.163831	0.29084
Fzd2	-0.848123	0.261017	7.02681	0.0156582	0.0441303
Sdf2l1	-0.84797	5.93782	135.186	4.63584e-10	1.89689e-08
Lgr6	-0.846928	4.07211	71.678	6.45394e-08	1.0514e-06
Rapgef6	0.846615	-1.95595	0.736013	0.401494	0.556451
Rab14	-0.845781	-1.15776	2.09044	0.164305	0.291297
Usf2	-0.845778	1.93204	20.0008	0.000253605	0.00125307
Il17ra	0.845198	-1.27028	1.85651	0.188755	0.322598
Serpine1	-0.845179	5.80939	74.8862	4.45549e-06	3.7975e-05
Ankrd13b	-0.844916	1.95904	21.261	0.000184763	0.000953414
Tigd5	-0.844852	2.98963	41.1205	3.54873e-06	3.15025e-05
Ak8	0.843846	-1.30999	1.45404	0.24249	0.39118
Lefty1	-0.843792	2.00218	21.5657	0.000171414	0.000891542
Gtpbp10	-0.843783	-1.27064	1.72389	0.204627	0.343262
Nol9	-0.843548	-0.864838	2.67052	0.118468	0.22575
Eid3	-0.843443	0.842039	10.0129	0.00504529	0.0169227
Ercc4	-0.842733	-1.12225	1.89489	0.18445	0.317207
Amotl2	-0.842219	-0.621699	3.10313	0.0940134	0.189456
Rapgef2	0.84195	2.13751	21.261	0.000184767	0.000953414
Nt5m	-0.841794	-1.08826	2.00113	0.17315	0.302847
Dnahc6	-0.841306	1.14146	11.9688	0.00258532	0.00957612
Bend3	-0.841049	6.87232	270.289	8.60137e-13	1.12224e-10
Col10a1	0.840896	-0.597654	2.81588	0.109494	0.212359
Arl13b	0.840762	5.73288	173.917	4.3035e-11	2.83207e-09
Slit2	0.840387	0.77711	7.93718	0.0109055	0.0324716
Polr3a	0.839473	5.84829	162.975	7.56675e-11	4.46421e-09
Trim2	-0.838786	1.56375	16.2168	0.000704208	0.00305828
Rai1	-0.838572	1.85709	16.1018	0.000727735	0.00314741
Pde5a	0.838515	5.16633	88.3448	2.11158e-08	4.14986e-07
Ulk4	-0.838249	0.767216	9.05271	0.0071449	0.022639
Ubp1	0.838109	1.57091	16.5708	0.000636906	0.00280437
Tect1	0.838099	-1.08792	1.55805	0.227177	0.371767
Acvr1	0.837659	-0.213223	4.60091	0.0449161	0.105329
AK172704	0.837541	-1.39245	1.20808	0.285266	0.43879
Aftph	0.837413	0.971858	10.6735	0.00400253	0.0138463
Slc12a6	0.837127	-0.894915	2.42882	0.135408	0.25095
Sorl1	0.836292	-1.62171	1.21571	0.283795	0.437028
Rhbdf2	0.835788	-1.62179	1.25486	0.276405	0.428868
Acsl1	-0.835694	-1.19482	1.8818	0.185904	0.319185
E2f5	0.835571	3.73985	55.8015	4.20075e-07	5.06946e-06
Ifi30	-0.835333	6.80852	170.594	1.12263e-10	6.09302e-09
Agrn	-0.835328	4.75533	105.684	2.93668e-09	8.20313e-08
A130049A11Rik	0.834999	-0.0877751	4.05791	0.0581487	0.130068
Gm6644	-0.834309	-0.807181	2.67164	0.118395	0.225652
BC023105	-0.833932	-1.15697	1.48204	0.238167	0.385893
Cep57	-0.833476	-0.647144	3.06965	0.0956785	0.191888
AK015493	0.833069	3.38053	44.1053	2.20892e-06	2.09757e-05
Cenpe	0.832816	8.61505	123.468	5.31077e-06	4.39418e-05
Pacs2	0.832734	3.17876	44.1657	2.18833e-06	2.0801e-05
Ankzf1	0.832218	-0.351281	2.84353	0.108836	0.211279
AK036632	0.83181	-1.15786	1.96948	0.176425	0.307343
Macc1	0.831791	0.709842	7.65822	0.0121634	0.0356395
Insig1	0.831264	7.84755	257.887	1.31291e-12	1.52808e-10
AK076722	-0.830557	-1.23207	1.72744	0.20418	0.34281
Eif2c3	-0.830479	-1.19437	1.8323	0.191534	0.326337
Aif1l	-0.830018	0.0277453	4.98947	0.0375518	0.0912234
BC024659	0.829931	6.64018	230.094	3.64508e-12	3.7788e-10
Pgf	-0.829734	-0.252191	3.26523	0.0868486	0.177996
Tcirg1	-0.829725	2.71521	31.7908	1.85697e-05	0.000130461
Pnrc2	0.82961	7.65733	297.363	3.6279e-13	5.58857e-11
AK137492	0.829319	0.149597	5.73572	0.0269408	0.0694031
Zfp703	-0.829221	1.08962	10.6607	0.00402033	0.0138987
Fkbp1b	-0.829114	-1.35024	1.48406	0.237858	0.385617
Klhl21	-0.828901	7.91127	293.494	4.0852e-13	6.0271e-11
Col1a1	-0.828628	10.1328	83.6905	0.000335021	0.00160098
AK051928	0.828505	0.0901486	6.0456	0.0235689	0.0620123
Rpl13a-ps1	-0.828336	3.08931	40.7775	3.75321e-06	3.30099e-05
Ppip5k1	0.827797	-1.1942	1.85707	0.188691	0.322594
Kif24	0.827513	-1.67238	1.07407	0.312869	0.468297
6330503K22Rik	0.827501	2.57504	29.6401	2.84353e-05	0.000188521
Myoz2	-0.827425	1.71838	15.0781	0.000980333	0.00410267
Ero1lb	-0.827258	2.72346	31.0648	2.13969e-05	0.000148138
1110012D08Rik	-0.827072	4.64751	95.9365	6.46386e-09	1.52842e-07
AK048595	0.826961	3.692	53.9316	5.37657e-07	6.19577e-06
Zfp862	0.826117	-0.139417	3.83153	0.0649519	0.141803
Zfp7	0.824179	-0.457333	3.79573	0.0661101	0.143852
Rnf39	0.823863	3.78182	59.9438	2.48482e-07	3.24141e-06
A630005I04Rik	-0.823704	-1.39196	1.50485	0.234716	0.381781
Stap2	0.823656	1.06703	10.4141	0.00438035	0.0149752
AK042791	-0.823555	-0.86503	2.37084	0.139894	0.257583
Strn3	-0.823106	-0.392413	3.59261	0.0731507	0.155364
A630001G21Rik	0.823053	-0.194409	4.11408	0.05659	0.12737
Cdca2	0.822924	-0.987915	1.73499	0.203236	0.341389
AK133807	0.822836	-0.836211	2.61272	0.122277	0.231493
ACRP	0.822616	-0.289297	4.34189	0.0507417	0.116332
AK162351	0.822357	-0.139614	3.65953	0.0709147	0.152086
AK040112	0.822032	-1.77919	0.867446	0.363195	0.519788
Rims2	0.821599	-0.139624	4.978	0.0377484	0.0915948
Wdr44	-0.821252	-0.140065	4.43655	0.0485179	0.112092
Adam33	0.821146	-0.232382	4.17797	0.0548751	0.124311
Grb2	-0.819975	-0.807469	2.71999	0.115319	0.221117
Grhl1	0.819598	-1.39269	1.21997	0.282979	0.436297
AB350566	0.819578	5.58515	155.212	1.15338e-10	6.19575e-09
Zranb3	0.819486	0.192571	6.25349	0.0215743	0.0576801
9930104L06Rik	0.818825	4.45284	80.4243	2.63855e-08	5.03439e-07
Gm13199	-0.818174	-1.47991	1.38395	0.253769	0.404663
Fam55c	-0.817895	4.86963	107.981	2.46064e-09	7.17972e-08
Kif11	0.817555	8.39358	346.72	8.95868e-14	1.9468e-11
Pax3	0.817365	0.750131	8.33039	0.0093725	0.0285315
6330409N04Rik	-0.816472	1.03588	10.6862	0.00398499	0.0138008
Gm11110	-0.81622	-1.15784	1.4524	0.242746	0.391228
Ptges3	0.816029	7.65927	323.097	1.70602e-13	3.08113e-11
AK041042	-0.815931	-0.98778	2.18172	0.155828	0.280079
AK157795	-0.81589	-1.15786	1.78317	0.197333	0.333952
Nfe2l1	-0.815717	-1.47964	1.27179	0.273289	0.425807
AK086660	0.815456	-1.35051	1.54547	0.228731	0.373939
Eif2b4	-0.815173	-1.05366	1.90578	0.18325	0.315714
AK020388	0.815067	-1.67251	1.01053	0.327244	0.483754
Mtch2	0.814989	1.55462	14.9736	0.00101116	0.0042111
2010209O12Rik	-0.814758	-0.0372619	4.97566	0.0377888	0.0916576
Klhdc8a	-0.814757	5.85595	148.322	1.70387e-10	8.62226e-09
Zfp810	0.81475	1.02095	9.87249	0.00530411	0.0176607
Gm5622	0.814599	-0.194065	4.61551	0.0446112	0.104753
Mon1a	-0.81454	-1.27037	1.55152	0.227856	0.37273
Syt12	-0.814411	4.7768	98.758	5.10964e-09	1.28047e-07
2410066E13Rik	0.814373	0.462655	7.25015	0.0143072	0.0408249
AI597479	0.814338	5.86378	104.272	1.73074e-08	3.49676e-07
Htra2	-0.814087	-0.572626	3.24124	0.087494	0.178864
Snord83b	-0.813613	1.47953	11.296	0.00323555	0.0115398
Stambpl1	0.812874	1.12614	8.98005	0.0073398	0.023137
Esr1	-0.812799	-0.807839	2.32962	0.143193	0.262457
Socs4	0.812533	5.39648	138.84	2.99558e-10	1.34097e-08
Ifitm6	-0.812415	-0.956745	2.13946	0.159685	0.285507
Mmp24	-0.81237	-1.47966	1.2832	0.271214	0.423292
Nbr1	0.812086	-0.779529	2.69308	0.117019	0.223641
Pkd2	0.81185	2.30019	22.0718	0.00015154	0.000802519
Galt	0.811261	-1.43551	1.31745	0.265113	0.416788
HDAC7	-0.810922	-1.39252	1.40915	0.249637	0.399594
DQ564920	-0.810835	-1.35076	1.55231	0.227743	0.372634
Mcm6	-0.810811	-0.175343	4.36636	0.0501559	0.115266
Luc7l2	0.810133	2.61461	17.9762	0.000631907	0.00278594
Bpag1	0.809919	1.48135	10.9464	0.00364387	0.0127914
Snord35a	-0.809638	-0.724609	2.7143	0.115676	0.22164
H2-Q2	-0.809591	5.42257	109.118	2.25703e-09	6.69755e-08
Asrgl1	0.808993	-1.67216	0.968393	0.337286	0.493669
AK007210	0.808938	-0.698448	3.01421	0.0985128	0.196145
AK054076	0.808571	0.59679	7.24689	0.014326	0.0408408
Gnpda1	0.808443	6.39559	200.924	1.21354e-11	1.00093e-09
6230427J02Rik	-0.808327	0.639408	7.19217	0.0146449	0.0415845
Pde7a	-0.808319	-1.2705	1.37905	0.254583	0.405344
Fbxl20	-0.808194	-1.31013	1.47159	0.239769	0.387949
Cdc42bpg	0.808177	5.27333	122.319	8.73229e-10	3.15416e-08
Hus1	-0.80709	1.11201	9.96456	0.0051328	0.0171777
Alpk1	0.807058	0.520866	7.42329	0.0133497	0.0386302
Nrp1	-0.807011	6.55734	217.576	5.99685e-12	5.76303e-10
Gpr137	-0.806993	3.25612	42.9376	2.65167e-06	2.44724e-05
Serac1	-0.806936	-0.865371	2.30684	0.145056	0.264766
Fmnl2	0.806849	5.46408	87.18	5.13112e-08	8.61429e-07
Bcs1l	-0.805676	-1.43549	1.24632	0.277995	0.430642
9530053A07Rik	0.805574	3.56956	45.9264	1.67261e-06	1.63974e-05
Mylk	0.805313	2.77522	23.5495	0.00011473	0.000633858
Gpr19	0.804419	-1.26969	1.46731	0.240429	0.388597
Btaf1	0.80413	6.34009	156.456	1.07667e-10	5.89927e-09
Sf4	0.803801	-0.98779	2.19988	0.154206	0.277783
Bcar3	-0.802753	7.18722	216.131	6.36234e-12	6.0041e-10
LOC100134990	0.802034	-1.19467	1.76246	0.199844	0.337314
Cyr61	0.801823	8.59259	300.45	3.30341e-13	5.32358e-11
Sars	0.801375	1.48115	14.372	0.00121098	0.0049493
Ptprq	0.800497	1.60937	14.439	0.00118669	0.00486901
A930001N09Rik	0.800397	5.32355	106.273	2.80564e-09	7.8791e-08
AK209715	-0.800278	-1.48007	1.29446	0.269187	0.421045
Fam76b	0.800224	-0.413382	3.2144	0.0887184	0.180943
2700007P21Rik	0.800133	1.58081	12.126	0.00245526	0.00914937
Fblim1	0.799972	-1.39255	1.32988	0.262943	0.414372
1700003F12Rik	-0.799151	0.0738831	3.61235	0.0733359	0.155599
AK014435	0.79915	-1.39181	1.08216	0.31113	0.466517
Id3	-0.798528	5.77179	56.0519	3.99527e-05	0.000251292
Spsb3	-0.798375	-1.62171	0.963026	0.338597	0.494741
4930511M06Rik	0.7982	-0.92467	2.21283	0.153062	0.276149
Anxa9	-0.797571	-0.956109	2.15072	0.158646	0.284071
Nek8	0.79726	4.26455	66.647	1.1242e-07	1.6847e-06
Ywhaq	-0.796336	-0.330427	3.85954	0.0640623	0.14027
Pqlc3	0.795965	5.0746	57.314	4.65377e-06	3.94403e-05
Arhgef2	0.795599	-1.52541	1.19585	0.287646	0.441414
Tnfrsf11b	-0.795484	2.79005	24.84	7.93543e-05	0.00045874
Hist1h2bk	0.794954	0.150643	4.87917	0.0394922	0.0950636
Gm11696	0.793862	-0.213018	4.47349	0.0476804	0.110498
Stard9	0.793585	1.16585	9.14481	0.00690614	0.0220152
AK178359	-0.793513	-1.62182	1.13347	0.300207	0.454708
Kdm5b	0.793409	2.36183	22.1788	0.000147673	0.000784819
Gm13476	-0.793372	0.247496	6.07903	0.0232345	0.0613207
Polg	-0.793013	-0.92561	2.11826	0.161663	0.288046
Ercc5	0.792946	4.13175	69.5644	8.11691e-08	1.27665e-06
Lancl3	-0.792937	4.78483	88.6723	1.2175e-08	2.59742e-07
Akap5	0.792922	-0.269682	3.92144	0.0621454	0.137163
Tgif2	-0.792526	1.59648	13.8187	0.00143403	0.00572029
AK016788	-0.792221	4.53355	83.825	1.90363e-08	3.80544e-07
Ttc39b	0.792029	7.12635	237.528	2.74416e-12	2.93263e-10
Sesn2	0.791958	7.73656	151.002	2.23001e-08	4.3258e-07
Dennd5b	-0.791636	-0.289281	4.03986	0.0586599	0.131015
Klhl23	-0.791189	2.28069	20.0631	0.000249601	0.00123562
Hr	0.791181	-0.413394	3.42408	0.0796581	0.165978
Tmx3	0.791019	6.53573	188.293	2.1488e-11	1.59636e-09
Metap2	0.790454	-1.47988	1.20221	0.286405	0.440283
LOC100499420	0.790264	3.04037	35.8724	8.68807e-06	6.79161e-05
2700089E24Rik	0.789938	7.4465	280.997	6.05679e-13	8.34801e-11
Lamc2	0.789676	7.21422	30.6632	0.00686481	0.0218967
Fam57a	-0.789529	3.93212	47.2353	1.37626e-06	1.38886e-05
Tmem219	0.78944	-0.2901	4.1055	0.0568249	0.127707
ramp	-0.789353	0.0114917	3.63477	0.0720387	0.153719
Ddah1	-0.789088	5.56103	121.589	9.18151e-10	3.26022e-08
Pnp	-0.789075	6.57638	169.395	5.41234e-11	3.37466e-09
Fam69a	-0.789072	4.83817	98.5667	5.1908e-09	1.29154e-07
AK078316	0.788447	0.730223	8.27818	0.00956144	0.0289971
Slc16a13	-0.788398	6.82768	153.692	2.64483e-10	1.20455e-08
D6Wsu163e	0.78837	5.20087	100.039	4.6009e-09	1.17835e-07
Ankrd1	0.787926	7.16798	220.835	5.25466e-12	5.19269e-10
Pla2g5	-0.787894	0.260701	5.07845	0.0360654	0.0882057
Pcdhgb6	0.786819	0.0595968	5.44061	0.0306675	0.0768707
Polr1a	0.786706	-0.835715	2.38227	0.138996	0.256515
AK200837	-0.786253	2.20312	20.6714	0.000213987	0.00108234
Accn2	-0.786211	-0.894508	2.03384	0.169845	0.298411
mFLJ00377	-0.785138	1.45585	13.2266	0.00172459	0.00672313
Xylt2	-0.784959	5.65915	144.612	2.11641e-10	1.00314e-08
AK040027	0.784723	2.96939	32.9242	1.49461e-05	0.000108197
Tubb6	-0.784707	5.94156	164.624	6.93506e-11	4.17499e-09
Tmem20	0.784131	-0.92478	2.12449	0.161079	0.287346
Adi1	0.783711	4.90778	78.7553	3.10993e-08	5.707e-07
Rbpms	0.783038	1.32735	9.57831	0.00589564	0.0193413
AK189470	0.783029	3.69738	50.0604	9.15328e-07	9.86426e-06
Umps	-0.782233	4.17689	66.5553	1.13598e-07	1.69992e-06
Plscr4	0.782096	2.13938	20.5563	0.00022027	0.00111036
Cebpg	0.780949	8.48906	344.665	9.45908e-14	1.95254e-11
Hyal2	-0.780189	3.65068	52.0899	6.89982e-07	7.64821e-06
Cfp	-0.78017	2.04673	16.3112	0.000685513	0.00299166
Zfp40	0.779647	2.23644	19.9796	0.000254982	0.00125878
R3hdm2	0.779619	-0.865108	2.06208	0.167052	0.29479
2210009G21Rik	0.779422	-0.924804	2.15233	0.158499	0.283904
Cables2	-0.779414	5.65147	143.222	2.29848e-10	1.06533e-08
C230091D08Rik	-0.779326	-1.62172	1.06144	0.315655	0.471615
AK141396	0.778791	-0.330146	3.17689	0.0904633	0.183726
Tmem33	0.778162	-0.924833	1.67056	0.21148	0.351516
2810030E01Rik	-0.778086	2.61833	28.4684	3.61644e-05	0.000230707
Palm	-0.777777	-0.158702	3.24943	0.0871242	0.178247
Hexim1	-0.777761	6.62626	199.165	1.3114e-11	1.06487e-09
Maf1	0.776931	-1.52541	1.13101	0.300717	0.455237
Crlf3	-0.776886	2.14839	19.2008	0.000311852	0.0015026
mKIAA0137	-0.776174	-0.988209	1.85332	0.189118	0.323008
Dscc1	0.77604	-0.724474	2.61037	0.122435	0.231708
1700106N22Rik	0.775522	1.80678	16.6989	0.000614325	0.00272095
Akr1b10	-0.775459	-0.895159	2.21763	0.15264	0.275578
AK213609	-0.775328	3.35753	43.1153	2.57836e-06	2.38501e-05
Fzd3	-0.775113	5.68731	130.893	4.93788e-10	2.01262e-08
Crybb1	0.774843	-0.525739	2.75133	0.113375	0.218238
Snord43	-0.774559	0.300806	4.6695	0.0435042	0.102752
Sorcs2	0.774376	1.73154	12.5348	0.00214987	0.00816528
Cenp-a	0.774268	-0.752379	1.91904	0.181803	0.314048
Fgf10	-0.773829	5.27369	95.2615	6.84372e-09	1.60376e-07
Gpsm1	0.773775	-1.39241	1.34481	0.260366	0.412028
Dennd4a	0.773573	5.69172	118.938	1.10394e-09	3.81644e-08
Pdk2	0.773541	0.988739	8.24512	0.00968325	0.0293156
Capn6	0.77334	-0.646541	2.90076	0.104626	0.204967
Sfxn2	-0.771978	3.64916	49.8994	9.36426e-07	1.00606e-05
Lrriq3	0.771468	0.618025	6.68348	0.018024	0.049763
Tm9sf3	-0.77138	-1.39183	1.30231	0.267787	0.41967
Synj2	0.770624	1.67648	13.5103	0.00157795	0.00621158
Zmym5	0.770348	-0.329684	2.45851	0.134139	0.248912
Ctrl	-0.77015	-0.865433	2.03389	0.16984	0.298411
Msto1	-0.770045	1.99802	16.2361	0.000700337	0.00304273
Atp6ap2	0.76949	7.40655	208.04	8.92248e-12	8.12722e-10
1700096K18Rik	0.76947	0.221102	5.48791	0.0300327	0.0755868
Zfp580	0.769182	2.43041	14.7151	0.00143194	0.00571413
Zfp438	0.768872	3.08171	27.6409	4.30188e-05	0.000267114
9130024F11Rik	0.768749	0.896625	8.4762	0.00886664	0.0272449
AK016077	0.767733	-1.43524	1.05875	0.316253	0.472125
St7l	0.767729	-1.52544	1.14261	0.298319	0.452883
Tmem41a	-0.767611	-0.57374	2.88744	0.105373	0.206084
Tsc22d2	0.767365	0.497866	6.64198	0.0183362	0.0504654
Ubl3	0.767152	1.53668	12.268	0.00234404	0.0087912
Zfp658	0.766999	3.18345	38.4797	5.51039e-06	4.53072e-05
Phf19	0.76698	7.02019	133.28	7.99046e-09	1.82369e-07
BC037112	0.766968	-0.349996	3.31411	0.0842677	0.173795
BC054353	0.766862	0.275518	5.69954	0.027369	0.0702155
Tbrg3	-0.766086	0.0285263	4.82694	0.0404507	0.0968727
Atp5a1	-0.765485	-0.371216	3.59775	0.072962	0.155089
Eda2r	0.764955	3.95144	54.003	5.32552e-07	6.1437e-06
Pabpc2	-0.76488	2.89974	32.6356	1.57884e-05	0.000113587
Rnaseh2c	-0.764736	4.59785	84.0536	1.86304e-08	3.73856e-07
2410002I01Rik	-0.764396	-0.0880876	4.24261	0.0532008	0.121014
Bbc3	0.764351	5.46899	99.9936	4.61794e-09	1.17983e-07
Glipr2	0.76389	4.24549	49.6767	1.06762e-06	1.11795e-05
Zkscan4	0.763876	-1.12242	1.36736	0.256539	0.4079
Slfn2	-0.763742	2.64291	25.5645	6.74719e-05	0.000398404
Ngrn	0.763719	-0.122799	4.26987	0.0525122	0.119707
BC099561	0.763375	-0.924929	1.54228	0.229454	0.374616
Hoxb5	0.763348	-0.122301	4.2777	0.0523162	0.119341
AK136619	-0.763254	-0.806887	1.72061	0.205309	0.343932
Tmem176a	0.762671	3.72145	46.6689	1.49672e-06	1.49031e-05
Murc	-0.762459	4.28317	69.7905	7.91819e-08	1.25292e-06
Dguok	0.762309	-0.779217	2.37011	0.139952	0.257644
1500012F01Rik	0.762162	7.71114	246.949	1.93729e-12	2.18205e-10
Glrx	-0.762044	4.97792	93.1974	8.16701e-09	1.8583e-07
mKIAA1055	-0.761798	-0.835612	2.2361	0.151031	0.273144
Lyst	0.761705	5.4047	117.214	1.24685e-09	4.20451e-08
Lynx1	-0.761109	5.5765	88.836	2.0243e-08	4.00691e-07
0610007P22Rik	0.760658	-0.724813	2.55739	0.126061	0.237199
1500015A07Rik	0.760598	1.64497	14.4183	0.00119414	0.00489383
Tmem42	0.760266	1.84312	16.4127	0.000666044	0.00291795
AK168184	0.75978	2.91347	32.6689	1.56886e-05	0.000113025
AK079754	-0.75972	0.794811	6.36468	0.020586	0.0554911
Pcdhgb2	0.759627	1.53684	10.4106	0.00438568	0.0149886
Slmo1	-0.759357	0.700896	7.26293	0.0142339	0.040649
Plxnc1	0.759351	0.0593012	5.05095	0.0365176	0.0891036
Hist2h2be	0.759186	2.86955	31.4116	1.9991e-05	0.000139418
Plk4	0.758972	-1.02011	1.93156	0.18045	0.31238
Msx1	-0.758442	4.49091	75.2359	4.4403e-08	7.69661e-07
2210411K11Rik	-0.758312	4.59656	66.0865	1.19834e-07	1.78051e-06
Myl6	0.758184	3.54353	41.2557	3.47156e-06	3.09223e-05
A330023F24Rik	-0.757621	-1.30949	1.18884	0.289022	0.443006
6530418L21Rik	0.757575	0.0448092	3.6786	0.0700691	0.15073
Myst4	0.757103	5.25037	103.453	3.49807e-09	9.50055e-08
Arip2	0.756814	-1.1944	1.4539	0.242513	0.39118
Agfg2	-0.755681	-0.621523	2.45962	0.133095	0.247457
Cdnf	0.755331	2.47986	18.2166	0.000404789	0.00189209
Hyls1	0.755317	4.88463	66.3036	1.47547e-07	2.12296e-06
Lrrc24	0.754569	-0.0040622	4.08753	0.0573206	0.128594
Hist1h2af	0.754448	0.947616	6.72821	0.017694	0.0490071
Irf8	0.75423	1.23208	4.76823	0.0508526	0.116535
Qrich1	-0.754056	0.0586258	4.24218	0.0532116	0.121014
Ifitm5	-0.753272	-0.751788	2.39257	0.138192	0.25527
Nrp2	0.752999	-1.6719	0.734464	0.401981	0.556978
Mns1	-0.75288	3.28555	34.6625	1.08142e-05	8.16716e-05
Dync1li2	0.752872	-0.392403	3.00646	0.0989165	0.196688
Nol3	0.752766	-0.330104	3.5841	0.0734639	0.155776
Gcnt3	-0.752549	5.17052	75.8482	4.97078e-08	8.38469e-07
Pappa2	0.75246	3.21344	38.1242	5.85591e-06	4.78103e-05
AK039065	0.752137	-1.08699	1.5392	0.229642	0.374864
Vcl	0.75159	8.77158	176.202	5.12462e-09	1.28116e-07
Irf1	-0.751384	-1.77938	0.724039	0.405281	0.560511
Pigh	0.751345	1.52581	12.4921	0.0021797	0.00825763
Ric8	0.751222	7.69226	268.881	9.01612e-13	1.13986e-10
Fam171b	0.751128	4.19251	40.79	6.70377e-06	5.38925e-05
Mier1	-0.750967	-1.52553	1.13351	0.300198	0.454708
Slc11a2	-0.75092	5.87568	119.017	1.09778e-09	3.80771e-08
BC094257	-0.750802	-1.19474	1.48371	0.237911	0.385617
AK007545	0.750779	-1.52524	0.833487	0.372557	0.5286
0610030E20Rik	0.750567	5.97475	135.25	3.74227e-10	1.61985e-08
4932415G12Rik	0.750503	4.30723	61.493	2.05644e-07	2.75112e-06
Srxn1	-0.750471	8.16532	296.686	3.70364e-13	5.62256e-11
Lrrc1	-0.750458	0.485978	5.46977	0.0302744	0.0760856
Depdc1b	0.749481	3.39177	33.2434	1.40723e-05	0.000102508
Fgd3	0.749386	0.679725	7.20103	0.0145927	0.04147
Dhrs7	0.749151	6.91326	185.803	2.41503e-11	1.74465e-09
Tubgcp3	0.748989	1.12777	9.27657	0.0065799	0.021162
Abhd3	-0.748851	-1.05397	1.56069	0.226538	0.370954
Rab11fip2	0.748688	3.59012	47.1974	1.38398e-06	1.3953e-05
Pbx3	-0.748512	0.93063	7.85034	0.0112807	0.033399
Gm7324	0.748129	-0.458049	2.58645	0.124056	0.234141
Ptgr2	0.748126	-1.67233	0.818746	0.37673	0.532935
Nudt2	-0.748003	5.41075	109.882	2.13075e-09	6.43216e-08
Epb4.1l1	-0.747481	1.11241	9.36089	0.00638016	0.0206145
Rnf216	0.747246	1.17091	8.9957	0.00729733	0.0230378
Acot6	-0.747104	1.51942	12.8196	0.00196208	0.00753401
Pms2	-0.746986	-0.370923	2.84504	0.107792	0.209781
Pml	-0.746935	1.39055	11.5134	0.00300746	0.0108623
H2-Q10	-0.746739	6.48038	123.844	1.45205e-09	4.69452e-08
AK017143	-0.74642	-0.751867	2.29296	0.146206	0.266348
AK144055	-0.74629	-0.752009	2.30725	0.145022	0.264766
AK153660	-0.745951	-0.434903	3.0474	0.0968045	0.193369
Adra1d	-0.745942	1.06758	9.10994	0.00699547	0.0222255
Tmod1	-0.745515	-1.77984	0.537335	0.472891	0.622615
AK035994	-0.745256	-0.59725	2.55683	0.1261	0.23723
AK137583	0.745022	1.50443	12.0831	0.00249009	0.00926267
Tmem87a	0.745022	0.740316	7.03954	0.0155775	0.043923
Cdk14	-0.744859	-0.43485	3.10179	0.0940797	0.189536
Serpinb9g	-0.744789	-0.779652	2.2546	0.149441	0.270875
Sumo2	-0.744634	4.97093	85.7985	1.58293e-08	3.24485e-07
Hmbox1	0.74431	4.21535	62.8651	1.74449e-07	2.40441e-06
Smarcd2	-0.744288	2.87266	26.1685	5.90599e-05	0.000354732
Nek2	0.744122	0.30197	5.65381	0.027921	0.0713174
Mapk14	0.744113	-0.392185	3.39886	0.0806887	0.167734
9230110C19Rik	-0.743928	-0.372096	2.66522	0.118811	0.226117
Atp8b2	-0.743427	5.27508	109.384	2.21221e-09	6.5832e-08
Dnm3os	0.743175	2.632	19.443	0.000292785	0.00142317
Csnk1e	-0.742563	5.38897	113.796	1.59473e-09	5.07744e-08
Anapc5	0.742396	2.23067	15.3184	0.000913308	0.00385296
5430405H02Rik	-0.742314	-0.0698296	4.22722	0.0535939	0.121751
Serpinb1c	0.742277	-1.67269	0.875182	0.361111	0.517466
Blvrb	-0.742067	7.29401	205.387	9.99516e-12	8.68468e-10
Car13	-0.741774	6.12776	132.864	4.35149e-10	1.80166e-08
Dalrd3	0.741711	4.15949	60.9201	2.20454e-07	2.93623e-06
Large	-0.741566	-0.597394	2.61343	0.122229	0.231444
Wisp2	-0.741549	0.390146	5.72826	0.0270285	0.0695556
AK134703	0.740907	0.56425	6.33607	0.0208353	0.0560766
Lmf2	-0.740509	2.84662	29.1931	3.11445e-05	0.000203605
Crct1	-0.74033	-0.479871	2.72869	0.114776	0.220277
Sox13	-0.740311	-0.672495	2.56661	0.125421	0.236164
Rbck1	-0.740206	-1.3921	1.09785	0.307714	0.462255
Btbd19	0.740194	3.85841	53.7175	5.53291e-07	6.348e-06
C79407	0.740094	4.71193	70.9658	6.96803e-08	1.12813e-06
Pex7	-0.740028	-1.05373	1.21983	0.283243	0.436511
Asnsd1	-0.739308	-1.27017	1.35105	0.259301	0.410671
Rps13	0.73906	-0.778895	2.32273	0.143753	0.263216
Colq	0.739008	-0.807216	1.64206	0.21545	0.356531
Csrp2	-0.738717	5.65635	99.1573	4.9447e-09	1.24809e-07
Sgol1	0.737727	5.95188	145.942	1.95703e-10	9.62297e-09
AK051864	0.737254	-0.289291	3.58252	0.0735223	0.155856
Arl2bp	-0.737001	-0.549768	2.57649	0.124739	0.235177
Pmel	-0.736975	-1.27023	1.3434	0.260608	0.412228
Trim34	-0.736522	0.719268	5.71245	0.0272153	0.069924
Larp6	0.73632	-0.836276	1.8799	0.186116	0.319334
AK204212	-0.736005	-0.525569	2.77441	0.111969	0.216087
Rtkn2	0.734975	-0.308921	3.3354	0.0833517	0.172279
AK019743	0.734703	0.19314	4.98403	0.037645	0.0914073
Socs3	-0.7347	5.66447	116.637	1.29919e-09	4.30949e-08
Stoml1	-0.734298	0.659509	4.89149	0.0394956	0.0950636
Bgn	0.734163	2.9289	30.813	2.24858e-05	0.000154088
Numa1	-0.733879	-0.526357	2.11405	0.16206	0.288557
Dkk2	-0.733717	4.31713	56.2795	3.94793e-07	4.80868e-06
Snord45b	0.733207	-0.45799	2.24353	0.15039	0.272267
Opn3	-0.732831	1.65979	13.4761	0.00159486	0.00626315
Rpap2	-0.732742	-1.27079	1.33108	0.262735	0.41423
Ociad1	0.732651	5.27146	107.277	2.59688e-09	7.47317e-08
Armc10	0.732482	-1.7791	0.72226	0.405848	0.560831
Sdccag1	0.731909	-0.698107	2.12258	0.161258	0.287519
Malt1	-0.731187	-0.925309	1.78876	0.196663	0.333125
Mllt4	0.730726	7.03101	201.738	1.17102e-11	9.89225e-10
Nxf3	-0.730108	0.586113	6.38289	0.0204291	0.0551391
Nup62	-0.729829	8.32781	265.501	1.01047e-12	1.24423e-10
Grsf1	-0.729737	1.44288	7.82759	0.0116196	0.0342283
P4ha2	-0.729474	-0.752345	2.09649	0.163726	0.290831
Fam173b	0.729379	-1.39242	1.17165	0.292433	0.446536
Rbm19	-0.729099	-1.08705	1.59256	0.222034	0.365176
Dnajb5	-0.728972	-1.01997	1.35213	0.259116	0.410565
Neurl2	-0.728628	1.35924	10.4279	0.00435931	0.014913
Coil	-0.728602	3.69479	46.1595	1.61503e-06	1.58998e-05
Klhdc1	0.728569	4.14009	45.0839	1.90037e-06	1.83131e-05
Slc46a1	-0.728468	3.58336	39.9537	4.29963e-06	3.68867e-05
Trim11	0.728346	-1.31007	1.26256	0.274982	0.427555
Stra13	-0.728014	1.16379	8.71186	0.00811228	0.0252529
Garnl3	0.727886	-1.31036	0.914481	0.351336	0.50797
Ccdc65	-0.727849	1.12688	9.17883	0.00682021	0.021781
Snord69	0.727324	-1.19437	1.21218	0.284475	0.437959
C1rl	0.727237	4.95824	88.1314	1.27846e-08	2.70543e-07
AK134717	-0.727134	-1.12228	1.44539	0.243847	0.392306
Rhpn2	-0.727082	4.81441	73.3644	5.39581e-08	8.99364e-07
2018-03-07	0.726891	1.45132	6.98996	0.0175388	0.0486673
Map3k14	0.72679	5.00531	77.8599	3.40065e-08	6.14169e-07
Stx4a	-0.726533	-1.02009	1.73162	0.203658	0.342042
Hspg2	-0.72652	8.26433	109.022	1.86905e-06	1.80445e-05
Psors1c2	-0.725456	-1.77957	0.649331	0.430192	0.583033
Rpap1	-0.725373	-0.988434	1.35631	0.258406	0.409748
AK158473	0.725149	-0.525252	2.76489	0.112547	0.216994
Fam84b	0.7251	5.88215	67.3724	2.09765e-06	2.00483e-05
Tcf19	-0.724247	0.607288	6.50374	0.0194212	0.0528682
Gm9767	0.723195	-0.864882	1.93598	0.179974	0.311763
Kif18a	0.723066	5.31007	104.108	3.32185e-09	9.10901e-08
H2-Q8	-0.723028	3.02305	29.6926	2.81341e-05	0.000186995
Hdh	0.722956	-0.350538	3.27722	0.0858833	0.176259
Sstr3	0.722513	-1.43532	1.09959	0.307342	0.462027
H2-Ke2	-0.722342	5.05981	78.6568	3.14053e-08	5.75123e-07
AK140218	-0.722246	1.40281	10.5162	0.00422708	0.0145171
Ppp2r3d	0.722133	2.13496	17.361	0.000510917	0.00231782
Capg	-0.721704	-0.436074	2.73051	0.114662	0.22014
2900092C05Rik	-0.721678	-0.92537	1.86839	0.187408	0.32103
Slco1a5	0.721567	0.553943	6.29288	0.0212182	0.0568878
Mertk	0.721078	1.32252	8.98234	0.00733357	0.0231244
Lrrn4cl	0.720801	-1.23185	1.4048	0.250344	0.400299
AK138089	-0.72004	-1.3923	1.1913	0.288539	0.442389
Ankrd50	-0.719731	6.94841	169.4	5.41069e-11	3.37466e-09
Mrps17	0.71972	0.378501	5.40015	0.0312227	0.0780728
Ddx24	-0.71939	-0.807822	1.94005	0.179539	0.311215
Cytb	0.719241	12.7452	13.3729	0.0557278	0.125916
Dynlt1c	-0.718978	0.247272	4.8877	0.0393382	0.094785
6430598A04Rik	-0.71849	-0.104904	3.09122	0.0946021	0.190349
AI661453	0.718435	1.74574	11.5467	0.0029741	0.0107724
Aspm	0.718328	6.81584	118.542	6.37489e-09	1.51766e-07
Ppp6r3	-0.718127	-1.43572	0.964666	0.338195	0.494362
Dlx4	0.717191	0.17956	4.20151	0.0542584	0.123048
Thumpd3	0.717106	5.56551	111.561	1.87968e-09	5.84264e-08
1700009P17Rik	0.716669	-0.725081	2.25057	0.149785	0.271406
Mc3r	-0.716433	-1.52598	0.968226	0.337327	0.493669
Brf1	0.716274	5.93329	125.562	7.01043e-10	2.68008e-08
Chst12	-0.716239	5.18925	83.364	1.98849e-08	3.95245e-07
Rp2h	-0.715971	-0.751721	1.8502	0.189474	0.323477
D6Mm5e	0.71557	1.85071	14.1864	0.00128118	0.00518794
AK142077	0.714748	2.57117	22.7747	0.000128037	0.000697444
Nasp	-0.714709	4.95529	87.6868	1.33109e-08	2.77906e-07
Mgst3	0.714689	6.06252	142.309	2.42744e-10	1.11524e-08
Hist1h1c	0.714652	4.61586	43.9054	6.18146e-06	5.0078e-05
H1f0	0.714236	10.1237	231.868	1.83692e-11	1.4045e-09
Unc13a	0.713997	2.95841	27.7027	4.24601e-05	0.000264901
Sestd1	-0.713649	-0.925276	1.64202	0.215266	0.356395
mKIAA0601	-0.713305	0.104896	4.35116	0.050519	0.115897
Grk4	-0.712821	-0.176556	3.28687	0.0854573	0.175574
Mbd4	0.712174	0.192216	4.58808	0.045186	0.105788
Mporc-b	0.712152	-0.699043	1.85436	0.188999	0.32291
Ccdc28a	0.71163	1.84045	9.90059	0.00542215	0.0180308
Steap1	0.711309	8.62944	217.775	6.15012e-12	5.85659e-10
AK155239	0.711173	-0.457486	2.87578	0.106031	0.206985
Serpinb9b	-0.711086	5.25522	43.8911	3.67453e-05	0.000233986
Ada	-0.710831	4.57536	64.0848	1.51066e-07	2.16177e-06
Dpf2	0.710649	-0.157152	3.61358	0.0723849	0.154269
Rgl1	0.710297	9.96137	340.512	1.05672e-13	2.08851e-11
Vldlr	0.710229	0.814657	5.57275	0.028931	0.0733428
C85492	-0.710182	-0.924788	1.68212	0.209971	0.349673
Setd6	-0.710133	0.935211	5.79179	0.0262922	0.0680027
C130039O16Rik	0.70986	1.54787	11.0774	0.00348445	0.0123268
Tm9sf1	-0.709543	2.0706	15.481	0.000870847	0.00370066
Zfp710	-0.708994	-1.52557	0.982387	0.333903	0.490002
Kctd4	-0.708924	-1.52542	0.850929	0.367705	0.523615
AK171960	-0.708593	5.35307	102.008	3.92447e-09	1.03549e-07
Gm2694	0.708451	2.97481	26.5345	5.4532e-05	0.000331335
Ocel1	-0.708142	0.729062	6.74182	0.017595	0.048792
Mettl14	0.708065	6.07468	123.993	7.79139e-10	2.89414e-08
4732471D19Rik	-0.70795	-0.502476	2.13937	0.159693	0.285507
BC050254	0.707627	2.82837	24.1295	9.3295e-05	0.000528823
Bok	-0.707419	6.72426	145.865	1.96593e-10	9.62297e-09
Il2rg	0.707107	2.58439	22.2334	0.000145743	0.000774952
Ube2w	0.70697	6.26224	146.039	1.94591e-10	9.62297e-09
Sec20	0.706603	-0.525961	2.12759	0.160789	0.287026
Phtf2	-0.706329	2.35286	19.382	0.000297468	0.00144191
Phospho1	0.70573	-0.371502	2.98092	0.100262	0.198615
Impact	0.705183	7.9468	191.775	1.82941e-11	1.4045e-09
Itgb4	-0.705181	-1.08804	1.35868	0.258003	0.409296
Per3	-0.704815	-0.572963	2.55258	0.126396	0.237531
Zfp518a	0.704172	5.31612	99.9056	4.6512e-09	1.18543e-07
Rpp38	0.704048	4.54997	68.4248	9.20612e-08	1.41815e-06
AK140234	0.70401	-1.52526	0.935389	0.345459	0.501845
Lrrc39	0.703439	-1.47973	0.963234	0.338546	0.494736
Snx22	-0.703297	0.389727	5.21095	0.0339744	0.0837762
Pla2g6	-0.703123	-0.807219	2.03928	0.169302	0.297807
Crebzf	0.703043	5.48437	108.067	2.44452e-09	7.1526e-08
aprt	-0.702771	-1.5253	0.762797	0.393217	0.548462
Gm3219	-0.702662	0.27463	4.38806	0.0496429	0.114313
Pcdhb9	0.702518	-0.270132	3.35154	0.0826648	0.171129
A3galt2	-0.702489	-1.67228	0.816367	0.37741	0.533402
AK077428	0.702423	3.75443	45.8	1.70476e-06	1.66425e-05
9130208E07Rik	-0.702339	-1.43571	0.94206	0.343784	0.499961
Rufy2	0.701669	3.46294	35.585	9.14769e-06	7.07174e-05
Hspa8	-0.701661	1.53136	10.4008	0.0044008	0.0150354
Kif15	0.701562	5.75805	120.83	9.67489e-10	3.4238e-08
DQ699740	0.701549	1.22846	8.36898	0.00923556	0.0281966
Paip1	-0.701352	-0.0209696	3.88214	0.0633548	0.139124
AK007899	0.701304	-1.57318	0.765081	0.392523	0.54764
AK161769	-0.700744	3.41614	31.744	1.87391e-05	0.000131563
Pigl	0.700432	-0.895128	1.52078	0.232346	0.378422
Lage3	0.700399	-1.67238	0.804749	0.380757	0.536271
Paip2	-0.700276	-1.67278	0.69891	0.413405	0.567849
Ccdc148	-0.700224	-1.02021	1.61241	0.219286	0.361679
1300018I17Rik	-0.700217	-0.251101	3.07003	0.0956596	0.191887
Brwd1	0.700141	5.09509	90.4649	1.03731e-08	2.26371e-07
Kif5c	0.699575	-0.622462	2.24113	0.150597	0.272546
AK028782	0.699448	1.71361	8.52893	0.00906864	0.0277841
Ppil2	-0.698263	-0.251042	3.19356	0.0896832	0.182485
Atp13a1	0.698226	-0.479764	2.51707	0.128907	0.241167
Zfp599	0.698179	2.22118	16.8046	0.000596357	0.00265146
Pak1ip1	-0.697852	-0.549443	2.30297	0.145375	0.265159
Osbpl6	-0.69727	-1.52548	0.710019	0.409783	0.564503
Dynll1	-0.696838	8.29331	272.834	7.90421e-13	1.04806e-10
Fgfbp1	0.696556	0.497012	5.13663	0.0351297	0.0861386
Nlrp1b	0.696503	-0.573272	2.44236	0.134385	0.249324
Ntf5	-0.696452	-1.08798	1.35597	0.258463	0.409777
Ptgs2	0.696239	9.83372	252.479	1.58825e-12	1.80836e-10
Ndc80	0.695844	7.29438	162.699	7.6786e-11	4.46852e-09
Zfp784	0.695109	3.24824	32.3853	1.65611e-05	0.000118495
Dctn4	-0.694843	0.987095	6.43173	0.0200148	0.0542726
E130306D19Rik	0.69467	4.26408	45.3682	1.81988e-06	1.76185e-05
AK040948	0.694569	-0.435257	2.48221	0.131429	0.24488
Sat2	-0.694161	-1.48019	0.94139	0.343952	0.500125
Tex9	-0.693659	-1.19418	1.31816	0.264988	0.416763
Med12	-0.693568	0.841497	6.93386	0.0162622	0.0455595
Gm4013	-0.693554	0.451015	5.2088	0.0340071	0.0838371
S100a16	-0.693376	-1.67255	0.809454	0.379397	0.535171
BC083502	-0.693357	2.48201	18.8575	0.000341272	0.00162492
Msh6	-0.693039	8.28781	268.407	9.1608e-13	1.14237e-10
Apol10b	-0.692971	3.39501	29.9968	2.64596e-05	0.000177347
Wdr55	-0.692425	7.09668	169.778	5.30692e-11	3.36909e-09
Ankrd16	0.692382	1.28768	8.12393	0.010145	0.0304843
Cdh13	0.691833	4.6681	59.6405	2.57974e-07	3.33614e-06
C330027C09Rik	0.691673	6.62672	143.779	2.22358e-10	1.0352e-08
Zfp78	0.69164	-1.30995	1.12352	0.302278	0.456907
Gtl-13	0.691445	-0.724709	2.05563	0.167686	0.295502
Tbcc	-0.691193	5.10171	73.1333	5.52877e-08	9.16359e-07
Mex3b	0.690885	3.93392	30.7527	3.33037e-05	0.000215343
Palb2	0.690771	-1.23194	1.04357	0.319658	0.476033
Cdkal1	0.690564	3.83397	45.6935	1.73238e-06	1.68963e-05
Cyb5r4	-0.689824	1.44275	9.94034	0.00517726	0.0172988
Paqr4	-0.688574	5.77332	97.1449	5.8406e-09	1.41621e-07
Zyg11b	0.68831	7.26398	202.172	1.14902e-11	9.78535e-10
AK143195	-0.687599	-1.30938	0.785028	0.387183	0.542793
Adamts10	-0.687512	0.520794	4.23901	0.0532924	0.121146
Prex1	-0.687342	0.0116907	3.74834	0.0676797	0.146597
Aktip	0.687047	-1.23188	1.28311	0.27123	0.423292
Trmt6	0.686982	-1.43499	1.02646	0.323555	0.480352
Lrp10	-0.686809	8.2961	241.108	2.40043e-12	2.59222e-10
AK029443	-0.686705	4.17837	37.7848	7.14988e-06	5.69977e-05
Dennd4b	-0.686588	-1.30979	1.19851	0.287127	0.44094
Atat1	0.686405	-1.23201	1.07597	0.312452	0.467963
Creld2	-0.686046	7.26505	190.77	1.91586e-11	1.45425e-09
Fam26e	-0.686041	1.85062	12.9427	0.0018866	0.00726548
Rgs7bp	0.685993	-1.57255	0.645308	0.431772	0.584569
Arhgap31	-0.685595	6.65378	144.347	2.14986e-10	1.01441e-08
Slc35e4	-0.685586	7.99181	137.863	6.36076e-09	1.51766e-07
Wdr67	0.684677	5.3231	85.0815	1.69197e-08	3.42812e-07
Arhgef3	0.684605	0.543337	5.07536	0.0361159	0.0883087
H60c	0.684253	0.787215	5.22026	0.0338326	0.083525
Ccar1	0.68382	6.71101	127.271	6.25667e-10	2.45463e-08
Znhit1	-0.683436	2.45435	16.1595	0.00071583	0.00310232
AK132865	0.683415	-1.23137	1.01607	0.325955	0.482316
Gabpa	0.68315	-1.23179	1.27307	0.273054	0.425632
Fam195a	-0.683006	5.19066	79.1611	2.98731e-08	5.55649e-07
Prss22	-0.68261	-1.52555	0.858633	0.365591	0.521953
Rnaseh2a	-0.682526	1.78271	12.1846	0.00240868	0.00900139
Nadk	-0.682503	2.18185	15.4983	0.000866466	0.00368354
Lrrcc1	0.681777	-1.23179	1.2707	0.273488	0.425983
Cep76	-0.681444	1.24013	8.78579	0.00789063	0.0246362
Bcar1	0.68142	0.585984	5.68531	0.0275395	0.0705665
Pex14	0.681278	7.49915	196.816	1.45597e-11	1.16422e-09
Rabep1	-0.681239	0.234491	4.43818	0.0484805	0.11203
Dcxr	0.68121	0.027651	3.50594	0.0764165	0.160823
Thop1	-0.680768	7.3984	176.898	3.71071e-11	2.49165e-09
Tmem88	-0.680389	6.05442	116.344	1.32668e-09	4.3839e-08
Dnajb9	0.680244	5.36933	89.6653	1.11377e-08	2.41048e-07
4933411K16Rik	-0.679858	0.30121	4.20983	0.0540424	0.12269
Adh7	0.679606	8.75854	263.373	1.08643e-12	1.30808e-10
Zfp187	0.679344	1.78703	12.4204	0.00223087	0.00841497
Gm10069	-0.679216	0.427555	4.33102	0.0510045	0.116781
Qsox1	-0.679066	4.22397	52.9151	6.16524e-07	6.92186e-06
4933430H15Rik	0.67903	0.428194	4.26814	0.0525555	0.119756
Snora24	0.678486	1.75878	9.76835	0.00550558	0.0182503
Kctd17	-0.678332	2.6494	20.0787	0.000248611	0.00123188
mazr	0.677333	-0.835748	1.8789	0.186228	0.319375
Fam46b	-0.677282	3.31528	26.5029	5.49068e-05	0.000333226
Ran	-0.677078	0.120286	3.90487	0.0626523	0.137982
Gm14420	0.676655	0.936908	4.50208	0.048311	0.111688
Tsga10ip	0.676532	-1.57264	0.784786	0.386612	0.542137
Fam134b	-0.676428	3.20389	28.2583	3.77821e-05	0.000239569
Rcor3	0.676121	-1.23149	1.18629	0.289523	0.443451
Vps13a	-0.67595	0.97946	6.60604	0.0186116	0.0510357
Dctpp1	-0.675904	5.8496	115.985	1.36125e-09	4.46993e-08
Fbxo2	-0.675737	0.59611	5.63845	0.0281093	0.0716935
Pccb	0.675662	0.192822	4.41211	0.0490812	0.113219
Spry4	0.675658	8.62389	219.483	5.54954e-12	5.43284e-10
Arhgef10l	0.675407	-1.35058	1.06637	0.314564	0.470185
Exosc4	-0.674644	6.69101	138.965	2.97264e-10	1.33641e-08
Mgam	0.67427	-0.140264	3.1142	0.0934705	0.188616
Epb4.1l5	-0.674233	-1.67245	0.633179	0.435893	0.587869
Gm9079	-0.673465	1.67618	10.2172	0.0046936	0.0159225
C030002c11rik	0.673451	-1.2707	1.02283	0.32439	0.481028
Zfp238	0.673314	0.904252	6.80452	0.0171468	0.0477693
BC029214	0.673277	4.41701	56.5939	3.79076e-07	4.63882e-06
Mrpl38	-0.672756	1.88208	11.4665	0.00305509	0.0109912
Bcl6	0.672403	5.74624	91.8196	9.20664e-09	2.05191e-07
mFLJ00163	0.672279	0.0897657	3.36912	0.0819241	0.169893
Asap3	0.672273	0.0750262	3.76127	0.0672473	0.145842
C130022K22Rik	0.672263	5.58148	97.984	5.44693e-09	1.33936e-07
Pdxp	-0.672134	1.8258	9.7707	0.00550094	0.018243
AK016007	-0.672085	-1.12167	1.07806	0.311996	0.467347
Tceal8	-0.672013	0.248019	4.1314	0.0561189	0.126664
Scarna10	0.671689	-1.43507	0.897212	0.355268	0.511818
Ccdc93	-0.671675	-0.646435	1.96836	0.176542	0.307496
Hdc	-0.671572	0.47397	5.03573	0.0367705	0.089658
4632428C04Rik	-0.671557	-0.724907	1.98414	0.174899	0.305161
Efhd2	-0.671154	6.82881	163.746	7.26403e-11	4.32334e-09
Dtna	-0.671133	-0.413021	2.15732	0.158041	0.28323
R3hdm1	0.670388	0.786838	4.10592	0.0576694	0.129189
9630014M24Rik	-0.670267	-0.392285	2.74373	0.113843	0.219049
AK050866	0.670137	0.757831	5.9413	0.0246475	0.064449
Gm2058	0.669507	2.90699	24.2927	8.9869e-05	0.000512175
Sppl2b	-0.669494	-1.83571	0.596626	0.449246	0.601127
Mdm2	0.669387	0.275086	4.52993	0.0464328	0.108157
Rps21	0.669311	-1.05402	1.29223	0.269588	0.421356
Gtdc1	0.669161	1.29576	8.77605	0.00791945	0.0247188
Thtpa	0.669061	4.2767	48.0869	1.21481e-06	1.25618e-05
Pdlim7	0.668809	-1.31005	1.01969	0.325116	0.481496
Zfp280b	-0.668792	5.61938	103.443	3.50092e-09	9.50055e-08
Zfp960	0.668734	0.597875	5.15732	0.0348037	0.0854971
Trim46	0.668517	0.815034	6.25537	0.0215571	0.057649
Ccnl1	0.668245	2.86312	20.5189	0.000222357	0.0011198
Marcksl1	-0.668182	4.05883	39.0869	4.97108e-06	4.1825e-05
Tbce	0.668132	1.63923	10.7659	0.00387683	0.0134827
Itgb1bp1	-0.667623	0.64847	5.59765	0.0286165	0.0727215
Gpatch4	-0.667545	-0.647157	2.14887	0.158816	0.284241
Fbxw17	-0.667517	1.74823	10.8487	0.00376803	0.0131567
Zfp69	-0.667247	0.339875	4.36697	0.0501415	0.115258
Srsf8	0.667181	4.92845	76.4637	3.91564e-08	6.87041e-07
AK200600	-0.667078	-0.175985	3.04997	0.0966738	0.193218
Cdca8	0.666888	6.74158	117.853	1.35326e-09	4.45767e-08
Fah	0.666869	5.96471	111.32	1.91359e-09	5.89556e-08
Tns1	0.666439	6.12662	112.975	1.6935e-09	5.34319e-08
2410002O22Rik	-0.666381	2.1574	14.8684	0.00104328	0.00432636
Tom1l2	0.666361	0.887004	6.63052	0.0184235	0.0506792
Kif4	0.666331	6.71943	132.866	4.35106e-10	1.80166e-08
AK020100	0.666248	-0.987592	1.48363	0.237923	0.385617
Ttc39c	-0.66558	4.2352	51.7387	7.24136e-07	7.99296e-06
AK087351	0.665164	0.106211	3.53814	0.075184	0.158685
Srd5a1	-0.664958	3.155	26.0503	6.06099e-05	0.000363001
Chid1	-0.664879	3.42893	28.9125	3.29903e-05	0.00021362
AK157659	0.66487	-0.864814	1.56978	0.225243	0.369236
Zfp275	-0.664521	-0.864834	1.71794	0.205377	0.343937
Crlf2	0.664188	-1.23183	1.17043	0.292677	0.446647
Eya1	0.664181	-1.52574	0.805711	0.380479	0.536271
AK163160	0.664164	-1.43548	0.92939	0.346974	0.503578
Edem3	0.664054	-0.502227	2.18979	0.155105	0.279162
Rint1	0.663959	0.85945	5.9526	0.024528	0.0641966
Gm4902	-0.663941	2.39169	16.0242	0.000744113	0.00321029
Cdc34	-0.663867	7.60439	181.032	3.03259e-11	2.13198e-09
2018-03-04	-0.663658	-0.956472	1.25152	0.277025	0.429457
Tpcn2	-0.663505	-0.0201452	3.62628	0.0719255	0.15354
Sec24a	0.663212	-0.30981	2.67296	0.118309	0.225531
Btf3l4	-0.663033	-0.597169	2.21953	0.152474	0.275373
Vwa1	-0.662718	0.678591	4.82701	0.0404493	0.0968727
B230354K17Rik	0.662607	2.80013	20.0456	0.000250718	0.00124056
Insl6	-0.66253	0.179044	3.08967	0.0946787	0.190399
AK006576	-0.662316	-1.30992	1.01963	0.325128	0.481496
Coro7	0.662256	3.92267	38.7987	5.21941e-06	4.33367e-05
DQ549963	0.662165	0.438959	3.75567	0.0674342	0.146156
AK080030	-0.662105	-0.139885	3.26574	0.0863936	0.177202
Cspp1	0.661866	0.301734	4.11641	0.0565262	0.127313
Hnrnph3	0.661808	1.29516	8.49148	0.00881539	0.0271352
Tgds	0.661726	0.650403	5.50021	0.02987	0.075308
3110082I17Rik	-0.661421	-1.57259	0.677464	0.420539	0.574185
Hdhd3	-0.661398	2.41152	13.1169	0.00179229	0.00694826
AK150559	0.661369	6.19561	129.344	5.46029e-10	2.17477e-08
Kbtbd10	0.661343	-0.104444	3.42029	0.0798122	0.166209
Cox7a1	-0.661341	1.23377	7.82877	0.0113762	0.0336245
Mlf1ip	0.661314	-1.35049	1.02393	0.324136	0.480857
mKIAA0077	-0.660895	-1.05294	1.34588	0.260183	0.411818
AK154077	-0.660874	0.0445196	3.77185	0.0668956	0.145259
Mvp	-0.660852	7.51597	185.241	2.47989e-11	1.76713e-09
Foxo1	0.660756	5.49655	96.0352	6.41029e-09	1.52263e-07
Epc2	0.660539	4.76812	68.7311	8.89829e-08	1.38088e-06
Aldh6a1	0.660532	3.33059	28.9381	3.28171e-05	0.000212722
Col11a2	0.660502	-0.176848	2.33112	0.143071	0.262297
AK044447	0.660395	-1.57301	0.797157	0.382968	0.53818
Pcdhb20	0.660304	1.35383	7.83766	0.0113367	0.0335362
Pgp	-0.660287	6.48304	114.949	1.46665e-09	4.72714e-08
Atp10a	-0.660236	7.85712	212.439	7.41307e-12	6.87185e-10
[truncated: 8,476 more rows]
