# Supplementary material for: miR-34a is a microRNA safeguard for Citrobacter-induced inflammatory colon oncogenesis
Source: eLife. 2018 Dec 13;7:e39479. doi: 10.7554/eLife.39479 (PMC6314783; doi:10.7554/eLife.39479)
Supplement: Figure 8—source data 2. [file elife-39479-fig8-data2.xlsx]

## Sheet: Sheet1
Figure 8-source data 3. Source data for Figure 8. This file contains gene profiling in CD4+ T cells for Figure 8.
genes	logFC	logCPM	F	PValue	FDR
Rasal2	-7.5605	-0.191854	73.8877	2.14722e-08	1.38139e-06
AK038731	-7.1235	-0.54818	54.4344	2.57132e-07	9.9651e-06
Plxna4	-6.11233	-1.29799	26.2963	4.15973e-05	0.000590951
BC125332	5.94219	-1.45627	23.3656	8.40325e-05	0.00102408
Mlana	-5.74432	0.776028	100.088	7.78892e-10	8.56357e-08
Eno4	-5.70086	-1.54527	19.3148	0.000241858	0.00241262
Amica1	-5.5666	-1.63854	17.4126	0.000413494	0.00369306
Hist2h2ab	5.38624	-1.78987	15.3212	0.000771673	0.00585997
Cln3	-5.29761	-1.79064	14.1028	0.00113058	0.0078705
Bmx	-5.17329	0.570779	108.771	2.76705e-10	3.58829e-08
Fabp7	-5.11724	0.514473	89.7894	1.73227e-09	1.57855e-07
Fam13a	-4.83208	1.68708	177.74	4.39679e-12	1.14035e-09
Gda	-4.77835	0.23382	75.7004	8.37125e-09	6.13589e-07
Unc80	-4.74522	0.790323	88.2023	1.32332e-08	9.16808e-07
Dthd1	-4.69184	-0.931147	31.8754	8.88683e-06	0.000170247
Blk	-4.67937	0.150829	74.1928	1.00409e-08	7.15238e-07
Cdh2	-4.58029	1.43228	185.547	1.24403e-12	4.49406e-10
Gnat3	-4.56659	1.61166	60.6251	4.64594e-05	0.000645517
Fzd3	-4.53618	-1.02215	27.4858	2.41122e-05	0.000385909
Cpne4	-4.43014	-1.05417	24.775	4.67797e-05	0.000649076
Wdfy3	-4.37591	-0.102861	59.1357	7.35217e-08	3.69986e-06
B4galt6	-4.29907	-1.18773	20.9057	0.000129478	0.00144874
Cpxcr1	-4.25271	-1.22338	22.013	9.58448e-05	0.00114001
Col8a1	-4.24366	4.61036	560.256	9.71902e-14	5.46155e-11
Gpld1	-4.22674	1.89348	175.567	3.50703e-12	9.4237e-10
Rgs22	-4.20379	-0.663956	35.9814	3.75527e-06	8.63285e-05
Krt8	-4.08717	-0.338407	46.0359	5.77022e-07	1.89499e-05
Hepacam2	-4.07516	2.11711	238.84	8.5676e-14	5.09772e-11
Hist1h4a	4.06434	-0.870324	32.1923	8.29592e-06	0.000160446
Myo1d	-3.97674	0.403682	64.4223	4.53571e-08	2.53473e-06
B230120H23Rik	-3.91679	1.91846	201.424	5.24944e-13	2.21242e-10
BB019430	-3.90127	-0.154607	48.5359	3.78241e-07	1.3567e-05
Lama4	-3.87257	0.740498	58.4009	4.45803e-07	1.54428e-05
Abca5	-3.84589	0.498353	71.8554	1.36946e-08	9.35955e-07
BC029710	-3.83824	0.473198	69.3623	1.98018e-08	1.28394e-06
Lum	-3.82205	-0.20667	51.9668	2.16973e-07	8.74374e-06
Lancl3	-3.79892	-0.960693	25.7774	3.64484e-05	0.000530469
Chi3l1	-3.77845	-1.54578	14.2126	0.000968718	0.00694443
Actr5	-3.75653	-1.54568	13.9341	0.0010623	0.0074671
Arg1	3.75121	-0.116667	43.7767	1.4631e-06	4.05902e-05
Mup6	-3.631	3.45483	422.28	1.67472e-16	2.8233e-13
Gng11	-3.62626	3.19873	5.94575	0.120803	0.260261
Il10	-3.56482	1.7229	167.805	3.54029e-12	9.4237e-10
Plek	-3.32952	-0.616163	29.3648	1.55618e-05	0.000268613
Slc15a3	-3.32563	-0.356653	38.054	2.48814e-06	6.1989e-05
Birc6	-3.31867	-1.79071	8.95625	0.006413	0.0299481
Ly6g6d	-3.30889	0.195285	56.0754	1.15276e-07	5.27609e-06
AK146139	3.30187	1.03809	94.0309	1.12065e-09	1.13354e-07
AK037999	-3.30057	-1.79065	8.96991	0.00637858	0.0298148
mKIAA1823	-3.29588	-1.2975	15.8013	0.000580748	0.00469701
B130006D01Rik	-3.29283	-1.29794	14.4032	0.000909886	0.00664513
Gpnmb	-3.28943	5.44372	22.8782	0.0322877	0.100028
2210016F16Rik	-3.2805	-1.29814	14.3279	0.000932672	0.00676271
Cubn	-3.23396	1.11661	82.7606	4.72315e-09	3.70346e-07
AK003103	-3.2331	-1.84506	8.36764	0.00810953	0.0357576
AK076597	-3.23026	1.39944	96.8798	1.14793e-09	1.14963e-07
1810046K07Rik	-3.22012	6.00798	778.226	1.25476e-15	1.43267e-12
Robo1	-3.19255	-1.37611	13.2264	0.00134756	0.00906286
Lgr6	-3.18075	0.0912731	38.8881	2.11683e-06	5.49793e-05
Alpl	3.16334	-0.567665	32.3586	8.00292e-06	0.000156273
Arnt2	3.15632	-1.49936	12.3738	0.0018076	0.0113847
Pcdhb19	-3.13892	-1.37522	13.7422	0.00113251	0.00787311
AK080151	-3.13546	-0.73838	26.095	3.37148e-05	0.000501508
Syt10	-3.12956	-1.90183	7.61481	0.0110403	0.0451752
AK135643	-3.12698	-1.41661	12.2838	0.00186541	0.0116329
Pygl	-3.12068	0.735538	72.4621	1.2416e-08	8.66126e-07
Gm11190	-3.06015	-1.45826	11.2872	0.00265999	0.0153572
Rgs4	-3.05387	0.310431	50.1439	2.90541e-07	1.10733e-05
Fbp1	-3.02149	1.75571	135.42	3.16053e-11	5.61947e-09
Slc40a1	-2.9875	-0.791033	21.5859	0.000107533	0.00124879
Hist1h3h	2.96316	0.0769543	46.0709	5.73558e-07	1.89319e-05
Pou2f3	-2.94832	3.76091	351.606	1.27474e-15	1.43267e-12
Col5a3	2.91718	-1.29597	12.799	0.00155975	0.0102116
Bmper	-2.91632	1.54113	103.707	4.39169e-10	5.41732e-08
Stc1	-2.91457	3.72447	23.6303	0.0214592	0.0742084
Hist1h2an	2.87497	-0.635626	19.4289	0.000287319	0.00277578
Tmem151b	-2.80918	1.51342	91.679	1.68076e-09	1.56064e-07
Tmem119	-2.80838	1.11448	70.6458	1.68414e-08	1.12073e-06
Spock2	-2.80463	-0.713454	20.5372	0.000143363	0.0015831
AK076831	-2.76448	-0.764363	21.617	0.000106631	0.00124119
Pou5f2	-2.76315	-1.59106	9.01845	0.00625789	0.0293284
Egr1	2.75927	4.58036	18.9696	0.0384507	0.11408
Spib	-2.75619	4.79671	413.187	1.21978e-14	1.11631e-11
Ccr2	2.75558	-0.498414	26.2553	3.24212e-05	0.000488735
Acot5	-2.74623	-1.02265	15.258	0.00068996	0.00537271
Runx1	-2.74591	-1.63881	8.14647	0.00887004	0.0381627
AK048828	-2.7306	-1.63907	8.6053	0.00737143	0.0332273
A3galt2	-2.71627	0.496921	55.2702	1.30138e-07	5.77343e-06
Ndrg4	-2.70189	-1.29707	11.2664	0.00268011	0.0154293
Dpagt1	-2.70005	-1.63838	8.49388	0.00770783	0.0344519
Dhrs3	-2.69377	-0.817578	19.8474	0.000173926	0.00185772
Rap1gds1	-2.69142	-1.63841	8.4684	0.0077871	0.0347142
Hist1h3d	2.66544	0.41729	42.4236	1.40714e-06	3.93574e-05
Hist1h4f	2.64715	-0.760772	20.3359	0.00015163	0.00165478
Hist2h2bb	2.6467	3.06852	129.173	1.23482e-08	8.66126e-07
Ptgs1	-2.61715	1.42845	84.643	3.00596e-09	2.51283e-07
B3gnt6	-2.60671	-0.873136	17.7773	0.000317111	0.00299282
Slc3a1	-2.59883	-1.37574	10.3287	0.00378562	0.0202815
AK085824	-2.57705	-1.11969	14.397	0.000911737	0.00664904
Hist1h4h	2.57191	-0.237377	30.0939	1.31877e-05	0.000234848
Nox1	-2.57154	-0.662584	16.2682	0.000544968	0.00449254
Iyd	-2.5495	-1.37556	9.38656	0.00542016	0.0263962
AK051514	-2.52152	-1.41667	10.204	0.00396697	0.0209425
Gpr126	-2.52077	3.02537	178.951	1.81551e-12	5.73872e-10
AK040452	-2.51975	-1.41594	9.31995	0.00556213	0.0269063
AJ308964	-2.48988	-0.568774	13.3736	0.0021366	0.0128488
Tas1r1	-2.48635	-1.4582	9.23752	0.00574351	0.0274085
Hist1h1b	2.47889	3.09267	84.88	3.89147e-06	8.88539e-05
AK015773	-2.46165	-1.45794	8.64889	0.00724425	0.0327562
Lin7b	-2.45615	-1.18746	11.2934	0.00265399	0.0153313
Tuba3b	-2.4536	-0.206683	30.1911	1.29022e-05	0.000231394
Hist1h2bn	2.45103	0.0904952	35.3795	4.24389e-06	9.46999e-05
A630005I04Rik	-2.4484	-1.45787	8.45117	0.00784125	0.0348634
AK085760	-2.44068	-1.45819	8.23767	0.00854732	0.0371535
Speer4f	-2.43083	-1.45789	8.88481	0.00659642	0.0305647
Hist1h2ag	2.42524	-0.611361	18.6124	0.000247916	0.00244889
Shisa4	-2.41815	-1.79052	5.94443	0.0227331	0.0772875
G3BP	-2.41631	-0.616061	12.9354	0.00225075	0.0134235
Ly6g6f	-2.40155	0.56042	45.1835	6.68791e-07	2.16128e-05
Csf2	2.39634	-0.764081	16.0529	0.000536701	0.00443551
2310046K01Rik	-2.38952	-1.02223	12.1959	0.00192376	0.0119015
Car5b	-2.37901	-0.397016	23.4183	6.61636e-05	0.000845629
AK162351	-2.37344	-0.524169	21.9554	9.73363e-05	0.00115423
Mup4	-2.36947	-0.375725	23.9214	5.8111e-05	0.000771382
Pycr1	2.36241	2.9471	177.541	1.97146e-12	6.04283e-10
Icos	-2.36015	0.793476	48.8342	3.6001e-07	1.31938e-05
AK043844	-2.34934	0.125964	31.2601	1.01694e-05	0.000192268
Ddx6	-2.34626	-1.05405	11.9712	0.00208238	0.0125901
Cntn3	-2.34508	-0.278585	24.0478	5.62597e-05	0.000751739
Nfat5	-2.3441	0.519275	44.2459	7.88396e-07	2.46131e-05
Ocm	-2.34035	1.64223	20.2206	0.00305977	0.0172038
Ctnna1	-2.29256	-0.395144	18.6096	0.000249442	0.00245917
Lef1	-2.28804	-1.29753	9.10282	0.00605404	0.028642
AK157456	-2.28422	2.02944	12.528	0.0267896	0.0871869
Eef1a2	-2.28127	0.181762	28.0104	2.519e-05	0.000399995
Hist2h2ac	2.27475	1.28831	25.9493	0.000713376	0.00552511
Omp	-2.27154	1.5439	70.6822	1.5516e-08	1.03936e-06
Slc5a1	-2.25674	-0.737804	15.974	0.0005501	0.00452011
4921536K21Rik	-2.25284	-0.591505	16.516	0.00046482	0.00401851
G9a	-2.24136	-1.59175	6.8179	0.0154745	0.0580582
Insrr	2.24008	-1.18752	11.2829	0.00266412	0.0153635
Cachd1	-2.23678	1.47876	69.7773	1.73951e-08	1.15001e-06
Il5	2.20596	-1.41559	7.70205	0.0106472	0.0439759
Dio2	-2.20428	2.87873	76.1978	8.66258e-07	2.61558e-05
Tbrg3	-2.20398	0.662673	43.8104	8.5168e-07	2.60047e-05
Cox6a2	2.20182	3.50418	165.322	1.8898e-11	4.02682e-09
Lcor	-2.20147	-0.480458	17.9289	0.000303125	0.00289529
Hoxb9	2.19817	0.659104	44.4001	7.67225e-07	2.41009e-05
Dcaf10	-2.19109	-1.33577	8.88282	0.00660161	0.0305748
AK008866	-2.18586	1.70102	60.4117	2.13796e-07	8.66403e-06
Pga5	2.18524	0.46948	36.8263	3.16955e-06	7.57803e-05
Polr1a	-2.18062	-0.791751	14.9052	0.000772784	0.005864
Kcnmb4	-2.17128	0.632424	41.7246	1.24182e-06	3.52837e-05
helB	-2.16081	-1.15306	8.88811	0.00661601	0.0306275
AK053246	-2.15748	-1.15312	9.20283	0.00582178	0.0277378
Hist1h1d	2.15673	2.35079	107.862	3.0022e-10	3.84396e-08
AK083994	-2.14245	-1.37526	8.39784	0.0080114	0.035433
Soat2	2.14074	0.893748	46.0815	5.72513e-07	1.89319e-05
Cspg5	-2.14014	-0.120972	22.1561	9.2245e-05	0.00110815
Snord88c	-2.13738	-1.15322	9.94167	0.00438043	0.0225142
Wwc2	-2.12494	-0.844733	13.5314	0.00121548	0.00831841
Cpeb2	-2.12486	-1.63847	5.80547	0.0242047	0.0807224
Sh3bgr	-2.11964	-1.37593	5.79948	0.0260297	0.0853176
Prodh	-2.1156	0.348549	35.6299	4.03271e-06	9.15531e-05
Hal	-2.10322	-0.568386	15.3414	0.000671844	0.00527616
Lrig1	-2.09251	-1.02243	11.3531	0.00259737	0.0150731
Il15ra	-2.08225	-0.591633	15.9321	0.000557371	0.00456872
9230019H11Rik	2.08194	1.25252	51.6178	2.4316e-07	9.60766e-06
Mir491	-2.07299	-1.41587	6.36721	0.0189114	0.0676446
Pdpk1	-2.07222	0.325224	31.0428	1.06692e-05	0.000200221
Dennd2d	2.0664	2.0185	91.9261	1.38821e-09	1.32469e-07
Socs3	-2.05967	1.2059	50.1299	2.91201e-07	1.10733e-05
Cdh22	-2.04413	0.383953	32.8394	7.21731e-06	0.000143707
Arhgap20	-2.0404	6.57947	622.645	2.13572e-18	1.08014e-14
AK040231	-2.0361	-0.188683	19.0293	0.000222366	0.00226737
Hist1h2bg	2.03261	0.698794	35.6422	4.12674e-06	9.30832e-05
Hist1h1e	2.02705	3.2521	20.4428	0.0123911	0.0493255
Foxj1	-2.02245	0.960651	48.5813	3.75404e-07	1.35218e-05
AK086852	-2.01892	-0.639446	10.0025	0.00555283	0.0268741
Polm	2.01832	2.70197	127.023	6.00165e-11	9.7914e-09
Hist1h3e	2.01618	1.18788	37.7488	8.13755e-06	0.000158291
Pigl	-2.01348	-1.45825	6.56754	0.01725	0.0632875
5033411D12Rik	-2.01195	-0.901521	11.8068	0.00220744	0.013212
Rgs8	2.01176	2.50324	74.8579	1.0176e-07	4.76282e-06
Igfbp5	-2.00402	-0.377134	16.1424	0.00052191	0.00436291
Itih5	2.00355	6.29841	564.245	6.49933e-18	2.19136e-14
Avil	-2.0011	4.1252	123.05	5.52538e-08	2.94154e-06
Kif26a	-2.00028	0.662222	38.6725	2.20666e-06	5.64405e-05
Ankhzn	-1.9979	-1.08663	9.87503	0.00449283	0.0229033
Raly	-1.99592	-1.45841	6.86237	0.0151809	0.0571472
Ms4a6b	1.99227	3.13511	127.242	6.61872e-11	1.05451e-08
Slc16a12	-1.98915	-0.415248	17.2919	0.00036682	0.00335478
AK052792	-1.98419	0.167435	20.0806	0.000242735	0.00241446
AK077492	-1.98296	-1.08675	9.90926	0.00443471	0.0226853
BC026590	-1.98177	-1.45765	6.75986	0.0158673	0.0592901
Spink5	1.98153	-0.317795	12.8401	0.00221633	0.0132495
AK082813	-1.97868	-0.119279	20.6755	0.00013797	0.00152687
AK163592	-1.97371	-1.29822	7.50073	0.0115787	0.0467776
Slc29a4	1.97357	-1.54487	5.9286	0.0228956	0.0776884
Hist1h2ab	1.97025	0.268089	6.95565	0.0397239	0.116669
Nlrp2	-1.96897	1.06677	43.4179	9.13462e-07	2.73363e-05
Chrna9	-1.9562	-0.336876	18.5815	0.00025016	0.00246384
Plekhg1	-1.95513	-1.08604	7.43897	0.0123663	0.0492655
Nlrp1a	1.95021	-1.37398	6.4501	0.0181596	0.0658366
Sema5a	-1.94366	0.272937	29.285	1.58486e-05	0.000270792
Hist1h3i	1.94164	0.680018	31.3637	1.12597e-05	0.0002067
mKIAA0885	-1.93816	-0.416317	15.9051	0.000562127	0.00460398
AK135429	-1.93291	-1.73824	4.46933	0.0453396	0.128164
AK134426	1.92257	2.25682	56.9469	1.40591e-06	3.93574e-05
Hapln4	-1.92127	-0.687907	13.444	0.00125185	0.00850975
Dync1li2	-1.92096	-1.29788	7.44456	0.0118544	0.0476854
Tmem169	-1.91486	-1.73774	4.32908	0.0485665	0.134589
AK035873	-1.91347	-0.817587	12.1243	0.00197286	0.0120723
Cd4	1.90529	0.666028	30.4983	1.33683e-05	0.000237646
Snora30	-1.90055	-1.73778	3.16832	0.0916034	0.214636
AK037193	-1.89877	-1.33639	6.70407	0.0162554	0.0604053
BC048859	-1.89798	-0.817631	10.2869	0.0038454	0.0204717
Hif3a	-1.88628	-1.29766	6.9552	0.0145875	0.0553668
AK086375	-1.88008	-0.591508	13.1946	0.00136224	0.00912524
AK144771	-1.87819	-1.15293	8.48483	0.0077359	0.0345621
Man1a	-1.87605	-0.844824	10.8486	0.0031216	0.0174737
AK163160	-1.87469	-1.33622	7.15572	0.0133913	0.0518976
Trib3	1.86704	6.49384	526.478	1.41833e-17	3.58659e-14
Lkap	-1.86656	-0.591142	13.7789	0.00111868	0.00781456
AK049578	-1.85963	-0.71283	12.5066	0.00172586	0.0110139
Hist1h2bk	1.85664	0.173268	23.4921	6.491e-05	0.000835324
AK153988	-1.85595	0.287195	27.5864	2.35432e-05	0.000378601
Padi2	1.85462	1.83337	64.8123	3.33358e-08	1.92681e-06
AM295304	-1.8518	-1.54587	5.59676	0.0266181	0.0867683
Ifrg15	-1.8513	-1.54572	5.11527	0.0332785	0.102438
AK045913	-1.85013	-0.501287	15.0181	0.00074516	0.0057144
Gm221	-1.84859	-1.33623	5.92468	0.0229361	0.0777403
Stard9	-1.84657	-1.15306	8.23269	0.00856462	0.0371938
Pck2	1.83749	4.88862	300.688	7.09142e-15	7.17297e-12
MRPL13	-1.83623	-0.300029	14.7792	0.000808119	0.00605939
Spnb1	-1.83552	-0.242809	18.6805	0.00024304	0.00241446
AK014089	-1.83372	1.00596	35.3719	4.25049e-06	9.46999e-05
Acat3	-1.83219	1.67163	40.8345	4.66386e-06	0.000101017
Mtx1	-1.83208	-1.33637	6.29591	0.0194356	0.0690276
Lats2	-1.82898	-1.54468	4.98409	0.0354027	0.10744
Ms4a6d	1.82669	-1.41591	5.28243	0.0308663	0.0967801
AK164218	-1.82246	-1.18856	7.59651	0.0111248	0.0454106
Smad7	-1.8213	1.39015	52.4368	2.01473e-07	8.35205e-06
Fam81a	-1.81997	-0.336606	16.6667	0.000443759	0.00390317
Tbr1	-1.81653	-1.18814	7.13388	0.0135162	0.0521887
Suox	-1.81261	4.75264	223.457	2.95984e-13	1.36085e-10
Hist1h4k	1.81193	1.62598	47.6137	5.9234e-07	1.93275e-05
Capn5	-1.80897	-0.764807	11.2215	0.00272408	0.0156025
Ehmt1	-1.80886	-0.764408	9.52139	0.00518321	0.0255872
Zmynd17	-1.80262	-0.901726	10.0208	0.00425089	0.0219938
Hist3h2bb-ps	1.80184	-1.117	7.9409	0.00964781	0.0408658
Gstm1	-1.80177	3.54031	133.366	3.68538e-11	6.42718e-09
C230096C10Rik	-1.80115	0.55983	30.148	1.30282e-05	0.000233239
Ncf2	-1.80058	-1.3751	5.47976	0.0280876	0.0900209
Hist1h1a	1.79458	2.05892	48.0493	2.20666e-06	5.64405e-05
Cdh17	1.791	-0.989456	9.58615	0.00501804	0.0249056
Hist1h3f	1.79053	0.317669	25.6237	3.78569e-05	0.000546252
Mical2	-1.78957	1.90294	61.4514	5.29012e-08	2.8312e-06
Gm12581	-1.78759	-1.37523	6.18754	0.0203919	0.0714211
Hook1	-1.78735	-0.103187	19.7818	0.000177182	0.00188114
Pigr	-1.7843	0.0983041	16.4699	0.000635285	0.00503765
Slamf9	1.78075	4.3077	182.735	1.7018e-12	5.55282e-10
Cd69	1.7796	5.40868	82.9577	0.000110475	0.00127757
Foxb1	-1.77745	2.21431	78.1556	6.26241e-09	4.76272e-07
Rbbp8	-1.77539	-1.18718	6.47281	0.0179796	0.0653715
AK079675	-1.77418	-1.37572	6.22637	0.0200433	0.0705423
1700101E01Rik	-1.77188	-1.05366	8.20396	0.00866508	0.0374881
Lrp4	-1.77172	-1.37613	5.92414	0.0229416	0.0777403
Nudcd3	-1.76585	-1.59149	4.45505	0.0456569	0.128766
Tert	-1.76585	-1.59149	4.45505	0.0456569	0.128766
AK041781	-1.76243	-1.37569	5.25427	0.031182	0.0975886
Zfp707	-1.762	-0.790894	8.23844	0.00894993	0.0383921
Pkhd1	-1.75607	5.86433	18.5263	0.0373055	0.111476
Sh3bp5l	-1.75423	-1.59152	4.41575	0.0465429	0.130477
AK084560	-1.75064	2.32581	67.3701	2.42513e-08	1.50492e-06
AK048878	-1.75035	-0.688385	11.7066	0.00228767	0.01354
Paox	1.74922	-0.545873	12.1137	0.00198019	0.0120952
Tnrc6a	-1.74838	-1.05386	7.39871	0.0120848	0.0483343
Mybpc2	-1.74516	0.967589	35.0267	4.56219e-06	9.96979e-05
AK084903	-1.74485	0.139455	22.3003	8.87635e-05	0.00107655
Yeats2	-1.74299	-0.688015	11.3268	0.0026221	0.0151905
AK053708	-1.74207	-0.279211	15.8987	0.000563245	0.00460568
AK081796	-1.74117	1.08349	34.8076	4.77281e-06	0.000102069
AK021192	1.73825	0.522439	29.1024	1.65267e-05	0.000279545
Tnfrsf8	-1.7331	3.51761	124.94	7.07574e-11	1.10109e-08
Nr6a1	-1.7305	-0.930208	8.81482	0.0067817	0.0312372
Uts2r	-1.73019	0.818542	34.1532	5.46734e-06	0.000113557
Krt27	-1.7275	2.01757	60.9388	5.68547e-08	3.01092e-06
Hist1h2bl	1.72615	0.801852	32.7121	7.41686e-06	0.000147101
Chac1	1.72574	5.48095	121.15	2.68998e-06	6.60416e-05
mKIAA0077	-1.71918	-1.08665	6.39426	0.0187142	0.0671366
4732415M23Rik	-1.71832	-1.26101	5.84231	0.0238045	0.0798616
Itgb3	-1.71823	-0.395974	14.5916	0.000855565	0.00633068
AK163711	-1.7159	-0.501857	13.0981	0.00140775	0.00938039
Hist1h4c	1.71584	0.547485	26.4015	3.12879e-05	0.000474328
B930059L03Rik	-1.7132	-1.63776	3.86251	0.0613243	0.159663
Tac4	1.71168	2.9558	97.3548	8.05407e-10	8.75988e-08
Nab2	1.71108	0.628028	30.6208	1.17181e-05	0.000212755
Tada1l	-1.7104	-0.502093	13.1012	0.00140626	0.00937663
Slc12a8	-1.7088	-0.930337	8.7315	0.00700977	0.0319243
Sh2d1b1	-1.7072	-0.960901	6.90715	0.0150843	0.0568453
Scd3	1.7054	0.0997899	14.0103	0.00144267	0.00955016
Zbtb8b	-1.70484	-1.41604	5.48867	0.0279726	0.0897375
Apoh	-1.70472	1.47865	46.452	5.37274e-07	1.81757e-05
Sbsn	-1.70305	-1.26037	6.50985	0.0176903	0.0645519
Espn	-1.70256	-1.41607	5.54689	0.0272337	0.0880931
Mllt4	-1.69666	-1.41666	5.31921	0.0302535	0.0953613
Prkar2a	-1.6958	1.01487	36.5348	3.35957e-06	7.88446e-05
Akr1b10	-1.69534	-1.26041	5.60747	0.0264879	0.0864826
A930005I04Rik	-1.69483	0.834756	33.2466	6.61747e-06	0.000132546
Ms4a4b	1.69011	0.00940788	18.439	0.000260802	0.00255127
AK196542	1.68828	-1.68657	4.16691	0.0526252	0.14267
Tmem91	-1.68778	-0.960531	8.19389	0.00870059	0.0375824
Tubb2a-ps2	-1.68578	0.66177	29.5078	1.50619e-05	0.000262222
Arhgef12	-1.68461	-1.25969	5.46428	0.0282887	0.0905508
AK138296	-1.68326	1.05256	36.8808	3.13534e-06	7.51515e-05
AK078316	-1.67629	-0.874103	8.55553	0.00751965	0.033745
Ctdspl2	-1.67296	-0.154637	16.0808	0.000532038	0.00442927
cot	-1.67173	-0.18952	16.0664	0.000534431	0.00443342
Nupr1	1.67008	3.35917	121.939	9.00795e-11	1.35956e-08
Rptor	-1.66904	-1.41581	5.25569	0.0311614	0.0975541
Cyp4f18	1.66787	-1.68705	4.09828	0.0544571	0.145977
Gm525	-1.66569	2.52598	6.54995	0.0855548	0.203497
Eif4ebp3	-1.66531	-1.84399	2.87564	0.103163	0.233122
Hist1h2bm	1.66219	1.28394	33.3948	8.18797e-06	0.000158966
mKIAA0173	-1.65093	-0.738285	9.79972	0.00462368	0.023396
Fmnl2	-1.65007	-1.45837	5.01786	0.0348416	0.106151
AK087617	-1.64953	0.765267	24.8589	4.70418e-05	0.000651798
Gstm2	-1.64666	-1.6383	3.66419	0.0678695	0.171368
Zfp651	-1.64321	-0.990494	7.54759	0.0113541	0.0460493
Esrrb	-1.64235	2.51055	73.0088	1.16058e-08	8.2093e-07
Cercam	-1.64046	-0.845467	7.67738	0.0107568	0.0442838
AK158473	-1.6399	-1.11914	5.01118	0.0369597	0.110704
Aldoa	1.63882	2.92121	94.0541	1.11803e-09	1.13354e-07
Gcnt3	-1.63487	-0.523065	8.95959	0.00688573	0.031568
Itfg2	-1.63368	-0.663653	9.8519	0.00453259	0.0230272
Scd1	1.63302	9.29199	480.429	3.9633e-17	8.01775e-14
AK131834	-1.63119	-0.991427	7.7093	0.0106153	0.0439336
Tsc1	-1.63028	-1.63845	3.93098	0.0592337	0.155623
5830427D03Rik	-1.62995	0.699078	24.6858	4.78435e-05	0.000658418
Fam40b	-1.62816	-0.457976	11.3599	0.00259095	0.0150445
Hspbap1	-1.62747	-1.15259	3.76281	0.0720177	0.179203
Phex	-1.6252	-0.791808	7.7866	0.0103172	0.0429107
Hist1h4d	1.62331	1.53978	37.9345	2.86312e-06	6.97843e-05
Tnfrsf26	-1.61869	5.77085	73.3781	0.000225091	0.00228599
Casp3	-1.61746	-0.764622	9.37203	0.0054508	0.0265199
Sgk1	-1.61729	1.67902	48.7157	3.67135e-07	1.33582e-05
Klk1b27	-1.61658	2.22625	68.0167	2.18176e-08	1.38796e-06
Kcnk3	-1.61552	0.272273	16.3638	0.000536734	0.00443551
mKIAA0241	-1.61538	-1.12123	5.69783	0.0254175	0.0838544
E330033B04Rik	-1.61531	1.72125	45.532	6.29487e-07	2.04735e-05
Hist1h3c	1.61412	0.159784	15.5942	0.000711761	0.00551683
DQ549194	1.60887	-0.258514	11.8676	0.00227947	0.013518
Lrrc8d	1.60845	-0.239418	13.884	0.00108016	0.00757157
Usp35	-1.60496	-0.479902	11.8357	0.00218487	0.0131002
AK020619	-1.60422	-1.11913	5.99349	0.0222376	0.0761969
Hist1h2bh	1.60151	0.699871	24.6295	4.85275e-05	0.000666924
Atp11b	-1.59846	-0.873489	7.20885	0.0130928	0.0511328
Hist1h4j	1.59837	0.671388	26.501	3.05413e-05	0.000466654
Itgb1bp2	-1.59761	-1.02262	6.78	0.0157298	0.0588413
AK134717	-1.59737	0.235277	20.4903	0.000145243	0.00160036
1700008I05Rik	-1.59722	-0.224684	13.5067	0.00122566	0.00837671
Aox1	-1.59718	4.00155	130.513	4.57776e-11	7.84814e-09
AK080425	1.59269	-1.54534	3.94301	0.058875	0.154922
Ly6g6c	1.59194	2.57516	68.1018	2.15778e-08	1.38139e-06
Pqlc2	-1.59052	0.418272	23.1109	7.16783e-05	0.000901773
Ksr2	-1.58654	-1.63818	3.02033	0.0954692	0.221554
AK134369	-1.58568	-1.02192	7.30013	0.012597	0.0497468
Baz1b	-1.58522	0.776614	28.1407	2.06597e-05	0.000338692
AK021342	-1.58281	-0.223527	12.5695	0.00168855	0.0108374
Il7r	-1.58079	1.81856	44.8252	7.11986e-07	2.2647e-05
2010317E24Rik	1.57988	-0.257205	13.9717	0.00104911	0.00741087
AK162806	-1.5792	-0.902941	7.24094	0.0129161	0.0506382
AK081204	-1.57774	-1.29711	5.42592	0.028794	0.0917326
Dlgap1	-1.57723	-0.901739	7.80909	0.0101859	0.042557
Lmo7	-1.57699	-1.02186	6.61971	0.0168622	0.0621124
Abr	1.57554	1.07256	30.8413	1.11566e-05	0.000205554
Hist4h4	1.57477	0.688121	26.9394	2.74743e-05	0.000428862
Gnaq	1.57473	5.88683	223.815	2.49039e-11	4.66486e-09
Tnks1bp1	1.5734	1.81998	49.9956	2.97622e-07	1.1233e-05
Zcchc7	-1.57231	0.194616	18.2428	0.000276267	0.00268438
AK019366	-1.56971	-1.33601	4.97442	0.035565	0.107739
AK042041	-1.56632	0.661401	26.4351	3.10333e-05	0.000472033
AK157659	-1.56492	0.718059	24.0733	5.58935e-05	0.000747835
Hist1h4b	1.56087	0.791731	18.6271	0.000444962	0.00390694
AK169831	-1.56045	-0.790309	7.79783	0.0102334	0.04272
Mvk	1.55951	-1.25811	5.58319	0.026784	0.0871869
Gabrd	-1.55825	0.701347	22.6252	8.14357e-05	0.000999662
Atp13a1	-1.55224	-0.171223	14.4764	0.000888361	0.00653036
AK169958	-1.55082	-0.615482	9.27538	0.00565941	0.0271818
Doc2a	-1.54917	-0.591717	10.2344	0.00392198	0.0207483
mKIAA0368	-1.54848	-0.105225	12.3389	0.00188421	0.0117213
Hist1h3a	1.54797	-0.220771	14.0862	0.00101002	0.00719967
wdp103	-1.54754	-1.1888	5.45444	0.0284174	0.0907902
2010002M12Rik	-1.54358	1.42792	39.9978	1.71314e-06	4.60863e-05
Gpx4	-1.54349	-0.81826	8.34816	0.00817356	0.0359005
Myo15b	-1.54348	-1.50122	3.71803	0.0660171	0.168043
BC033430	-1.54301	-0.523519	9.33798	0.00552331	0.0267825
AK035211	1.53871	-0.151586	15.1018	0.000725365	0.00560183
Epas1	1.53846	-0.87263	7.95122	0.00960704	0.0407272
Haghl	-1.53797	-1.33593	5.09213	0.0336427	0.103308
Arid3b	-1.53588	-1.50001	3.50303	0.0738582	0.182436
Nr4a1	1.53445	5.56103	262.405	3.11193e-14	2.24837e-11
Bnip3	1.53435	4.96928	154.622	2.14923e-10	2.82331e-08
Vrk1	-1.53129	-1.33697	4.62971	0.041942	0.121212
A630012P03Rik	-1.52997	-0.522143	9.69347	0.00481545	0.0241489
AK039030	-1.52865	-1.9006	2.33403	0.139946	0.287724
Nqo1	-1.52771	4.85327	117.643	2.63244e-08	1.59444e-06
Nmt2	-1.52769	0.0374764	13.9707	0.00105331	0.00742455
AK134490	-1.52485	-0.930602	6.52986	0.0175362	0.0640586
Cyp4f39	1.52372	-1.29648	2.72409	0.122844	0.263592
AK089801	1.52227	0.328563	16.66	0.000467383	0.00403377
Cyp4f40	-1.52057	-0.208627	8.55507	0.00893413	0.0383569
AK144143	1.51769	-1.02033	6.36996	0.0188108	0.0673764
Nptn	-1.51709	0.827628	25.4061	3.99529e-05	0.000569991
Tns1	-1.51214	-1.0535	6.37572	0.0187631	0.0672533
Smtnl1	1.51154	-0.18578	11.9887	0.00207561	0.0125642
Pdgfra	-1.51087	1.22024	23.9015	9.41233e-05	0.00112626
Brca1	-1.51015	-1.5009	3.28857	0.0829764	0.198605
Hist1h2ah	1.50989	-1.11777	5.49553	0.0278843	0.0895119
2510003E04Rik	-1.49723	0.0541882	15.8805	0.000566468	0.00462455
Ak8	-1.49645	4.03492	121.76	9.13991e-11	1.35956e-08
Gli1	-1.49622	2.83949	26.0428	0.000783182	0.00591627
Nyx	-1.49305	0.168798	16.5602	0.000458536	0.00399346
Hist1h3b	1.4929	0.161713	13.2619	0.00147313	0.00972631
Efnb2	-1.48831	-0.338441	9.738	0.00477038	0.0239942
AK139826	-1.48768	-0.738745	8.33055	0.0082319	0.0360641
AK039862	-1.48712	-1.37592	4.14728	0.0531418	0.143571
Ahnak	-1.48707	10.1453	43.0121	0.00662752	0.0306667
AK046150	-1.48679	-1.54583	3.47196	0.0749844	0.184542
Adam15	1.48666	-0.95917	6.39214	0.018628	0.0670303
Agpat9	-1.48572	-0.960964	6.74748	0.0159525	0.0595205
E130304I02Rik	-1.48533	-1.22353	5.16776	0.0324688	0.100404
Trpc2	-1.48456	-0.26155	10.7219	0.00327068	0.0181774
Ncoa2	-1.48453	-0.375377	11.2342	0.00271158	0.0155574
Nf2	1.48321	-1.5906	3.73618	0.0654057	0.16715
kremen	-1.47884	1.55019	34.9243	4.65927e-06	0.000101017
Kdm4b	-1.47803	-1.37628	3.86203	0.0613395	0.159663
AK158095	-1.4777	-0.0548429	13.0641	0.00142419	0.00945875
Sf4	-1.47752	0.395119	17.7231	0.000322277	0.00302958
Traf3ip3	1.47734	1.50351	39.1182	2.02532e-06	5.30728e-05
Gm6034	-1.47537	0.592732	19.3375	0.000201065	0.00208592
Trmt6	-1.47405	-1.54589	3.48305	0.0745515	0.183755
Nipal1	-1.47385	-1.22325	5.07149	0.0339711	0.104064
Glipr2	1.47263	4.89506	136.606	7.0682e-10	7.94387e-08
Arl4a	-1.47187	-0.222946	12.8997	0.00150667	0.00989606
Senp6	-1.47063	-1.08638	5.95187	0.0226572	0.0770729
Cybrd1	-1.46914	-0.845233	5.35553	0.0316375	0.0986478
Pygm	-1.46825	0.38381	19.3021	0.000203109	0.00210281
Slco4a1	-1.46749	-0.547012	9.23137	0.00575731	0.0274565
Alpk2	1.46745	0.142749	16.2637	0.000502586	0.00424346
AK042126	-1.46567	-0.663724	8.70865	0.00707376	0.0321578
Fundc1	-1.462	-0.316865	11.4586	0.0025004	0.0145689
Cd79a	-1.46079	-1.37458	4.03532	0.0562016	0.149679
C030006K11Rik	-1.45157	-0.56883	9.4187	0.0053531	0.0261704
Dhodh	-1.45137	-0.638937	8.62136	0.00732428	0.0330737
Trim11	-1.44994	-0.961333	6.065	0.0215366	0.0744
mKIAA1992	-1.44892	-1.73711	2.42474	0.132861	0.278338
AK043101	-1.44892	-0.873159	6.92996	0.0147462	0.0558644
Kdm4a	-1.44706	-0.873777	7.06076	0.0139437	0.0533637
Atp7b	1.44278	2.1775	53.5214	1.70104e-07	7.29068e-06
Zc3h12a	-1.44026	-1.73819	2.92353	0.100494	0.229044
Zfp750	1.43973	-0.520994	8.51885	0.00763101	0.0341992
Clk1	-1.43735	1.78177	39.6688	1.82332e-06	4.84731e-05
1110034B05Rik	-1.43624	-1.73785	2.89432	0.102112	0.231575
Phf6	-1.43422	-0.991746	5.52043	0.0275667	0.0887734
4933407K13Rik	-1.43392	-1.37563	3.87303	0.0609979	0.159142
Dntt	-1.43261	-0.872972	6.6878	0.0163705	0.0607437
mKIAA0357	-1.43257	-0.0715892	12.7647	0.00157831	0.0103096
Mtbp	-1.43153	-0.395568	10.1724	0.00401449	0.0211162
Klhl6	1.43109	7.2175	305.9	3.83276e-14	2.58456e-11
Igfn1	-1.42999	1.5761	35.4252	4.20448e-06	9.42978e-05
Il18r1	-1.42649	-1.54532	3.46532	0.0752452	0.185004
Kdm6a	-1.42559	-0.20685	11.6386	0.00234395	0.0138201
Dmwd	1.4251	0.595148	21.6471	0.000105766	0.00123537
Fiz1	-1.42212	-0.991082	6.12969	0.0209237	0.0727982
Grm4	-1.41745	-1.41683	3.96847	0.0581235	0.153258
Ifit1	1.41725	1.2076	24.2289	6.46414e-05	0.000833989
Mir142	-1.41474	0.384846	15.8943	0.000564036	0.00460842
Syp	-1.41367	-0.991481	5.91397	0.023047	0.0779519
6330512M04Rik	-1.41297	-1.11935	5.00056	0.0351278	0.106867
Poldip3	-1.41188	-0.206101	12.2342	0.0018981	0.0118003
Akap5	-1.41097	0.571496	19.1727	0.000210791	0.00217345
AK033508	-1.41056	-0.990242	6.05617	0.0216218	0.0746099
Slc7a8	-1.40984	0.690858	19.4822	0.000192918	0.00201172
Mt3	-1.40946	4.48669	142.337	1.9109e-11	4.02682e-09
Slit1	-1.40835	2.17986	50.8011	2.61293e-07	1.00877e-05
Frmd5	-1.40772	-0.0221314	6.83045	0.0214007	0.0741077
H2-T3	-1.40739	-1.11908	5.29584	0.0305841	0.0961235
Apc2	-1.4069	-0.479208	8.7836	0.00686618	0.0315106
Fam20b	-1.40452	-0.614811	7.52418	0.0114657	0.0464137
Ints7	-1.40353	1.36794	23.107	0.000115131	0.00132036
Hist1h3g	1.4022	0.04405	13.6297	0.00117601	0.00809758
Mgst3	-1.40086	-0.0223708	13.8005	0.00111066	0.00776871
ENSMUSG00000073777	-1.40051	-1.73771	2.33726	0.139685	0.287373
Hist1h2bb	1.40027	-0.184983	11.2977	0.00264985	0.0153215
Gm5544	-1.39809	-1.26015	4.45611	0.0456334	0.128766
Ecscr	-1.39705	-0.791387	6.73579	0.0160335	0.0598005
Itga11	-1.39595	0.966736	25.1556	4.25236e-05	0.000599897
AK044623	-1.3914	-0.688108	7.61651	0.0110325	0.0451615
Pcdhb21	-1.39083	-1.1187	5.07712	0.0338812	0.103883
Sdhaf2	-1.38545	-0.547018	8.51742	0.00763538	0.0342037
Fbxo3	1.384	-0.871181	6.37916	0.0187347	0.0671753
Nrarp	1.38258	-1.63808	2.86254	0.103908	0.23429
AK134400	-1.38153	-1.15359	4.72123	0.0401321	0.117595
Sp110	1.38074	-1.33505	4.18017	0.0522793	0.141885
Ndufs1	-1.38068	0.181018	14.3052	0.000939642	0.00679377
Kin	-1.3798	-0.0392031	11.7386	0.00226171	0.0134651
AK043693	-1.37955	-1.2601	4.40752	0.046731	0.130698
AK165120	-1.37756	-1.59142	2.89916	0.101842	0.23123
Gtse1	-1.37717	-1.41542	3.35712	0.0796412	0.19272
Gpc5	-1.37459	1.77324	39.4778	1.89081e-06	4.98062e-05
FKBP12-T1	-1.37415	-0.790299	6.52457	0.0175768	0.0641839
Insig1	1.37373	8.10228	375.681	6.13355e-16	8.86298e-13
Rbm7	-1.37223	0.0240186	13.6037	0.00118629	0.00815668
Mknk2	1.36934	-1.84406	2.00822	0.169594	0.329007
Stk32b	1.36868	-0.133079	8.03219	0.0111767	0.0455855
C230071H18Rik	-1.36758	0.718519	20.4183	0.000148183	0.00162568
Lyz2	-1.36754	2.06591	41.8792	1.20709e-06	3.46867e-05
Lbx2	-1.36719	0.682267	21.0759	0.000123563	0.00139335
Airn	-1.36689	0.441669	16.3678	0.000486617	0.0041467
Crabp2	-1.36664	-0.436732	8.6929	0.00711826	0.0322875
4933439C10Rik	-1.3658	-0.902348	5.98396	0.0223329	0.0764199
Grcc10	-1.36506	-1.15422	4.58858	0.0427853	0.12301
Egfr	-1.3624	6.10061	59.1699	0.000390152	0.00352356
Dhrs9	-1.36029	-1.15327	4.69891	0.0405653	0.118486
Slfn2	-1.35932	4.81655	142.877	1.83895e-11	4.02682e-09
Cyld	-1.35881	-0.818284	5.48996	0.0279824	0.0897408
Maff	1.35846	2.89103	46.3536	2.00077e-06	5.25658e-05
Accn5	-1.35414	-1.59033	2.71571	0.112696	0.247539
Gcm1	-1.3541	-0.397564	6.70237	0.0173124	0.0634243
mKIAA1109	-1.35227	-1.41547	3.68128	0.0672753	0.1703
LOC100504473	-1.35129	-0.614777	7.85392	0.00999926	0.0419678
AK153821	-1.35112	-1.05402	3.60892	0.0732626	0.181319
mKIAA1601	-1.35078	-0.738977	6.65804	0.0165834	0.0613314
AK148282	-1.34987	-1.02198	4.57461	0.0430759	0.123572
Kcnk5	1.34948	-0.90069	5.57902	0.0268353	0.0872547
Ldhal6b	-1.3487	-1.11911	4.56037	0.0433745	0.124252
Kat5	1.34695	-1.37447	3.92761	0.0593348	0.155808
Kcnq1ot1	-1.34633	5.25119	194.754	7.48493e-13	2.91193e-10
Ndrg1	1.34447	3.55614	78.2988	6.31034e-09	4.76336e-07
AK141672	-1.34437	-1.59073	2.80684	0.107144	0.239082
Ryr1	-1.34288	3.3486	80.3643	4.85242e-09	3.74673e-07
Slc15a1	1.34087	2.83539	56.8245	1.03092e-07	4.78337e-06
Il5ra	1.34055	-1.02002	5.27617	0.0308654	0.0967801
AK039373	-1.34014	-0.930946	5.60606	0.026505	0.0864834
Gpr18	-1.33996	1.6108	31.2382	1.02186e-05	0.000192838
Uvrag	-1.33472	0.167617	11.8604	0.00217976	0.0130773
Hist1h4i	-1.33022	3.12282	65.4064	3.07801e-08	1.78931e-06
mKIAA0259	-1.32966	0.928217	21.8212	0.000100914	0.00118691
AK160502	-1.3296	-1.41631	2.77866	0.109558	0.242648
Dgke	-1.32865	-1.29801	4.00739	0.0569956	0.151156
Gm10125	-1.32072	-0.931129	5.69905	0.0254033	0.0838403
AK080223	1.32061	-1.25889	3.50186	0.0739491	0.182616
Gm4841	-1.32052	-1.29702	3.65763	0.0680994	0.171906
Tim9b	1.31981	-1.02086	4.61903	0.0421593	0.121701
Srpk2	-1.31839	1.09787	18.8141	0.000290643	0.00280253
Slc18a1	-1.31667	-0.438621	7.87663	0.00990618	0.0416463
Tal2	-1.31625	-1.29724	3.74899	0.0649782	0.166309
Grhl3	-1.31622	3.11162	35.6278	4.72815e-05	0.00065335
Oplah	-1.31618	2.13579	41.379	1.32349e-06	3.72899e-05
Snx13	-1.31471	-1.59031	2.67193	0.115482	0.251909
Gm1070	-1.31429	-0.737157	6.47613	0.0179535	0.0653236
Zfp384	-1.31164	0.140798	13.0641	0.00142418	0.00945875
Acta1	-1.30978	-0.41629	8.933	0.00647207	0.0301821
mKIAA1272	-1.30819	-1.05363	4.93385	0.0362559	0.109048
Ttc19	-1.3079	-1.78983	1.94348	0.176356	0.337215
Efna2	-1.30718	2.03684	41.7502	1.23601e-06	3.52175e-05
AK009639	-1.30514	-1.2983	3.71557	0.0661005	0.168169
Lrrc27	1.30512	1.50021	29.3186	1.5727e-05	0.000269625
Dio1	-1.30501	2.52748	52.532	1.98483e-07	8.33051e-06
Naaa	-1.30398	-0.845333	5.86836	0.023526	0.0791371
Del1	-1.30292	-1.29754	3.88108	0.0607494	0.15878
Baiap2l1	-1.30158	0.79126	17.9971	0.00029706	0.00284812
Alkbh8	-1.29982	-1.63852	2.37505	0.13667	0.28388
Golga1	-1.29859	-1.08673	4.4467	0.0458436	0.129131
Uxs1	1.2981	-1.37545	3.28172	0.0828793	0.198467
Glrp1	1.29674	4.40506	118.359	1.20943e-10	1.72301e-08
D8Ertd82e	-1.29628	0.594475	13.9555	0.00113146	0.00787119
Dync1i2	-1.29573	-0.417542	8.21913	0.00861187	0.0373538
Ppt1	-1.29572	0.275751	13.9694	0.0010499	0.00741087
Rxra	-1.2957	5.46048	69.2336	2.38025e-05	0.000381557
Fbxl8	1.29516	-1.50141	2.95336	0.0988715	0.226366
Fsbp	1.29468	-0.5893	7.30396	0.0125767	0.0497315
Atat1	-1.29384	-1.05417	3.39533	0.0811095	0.195292
Car8	-1.29172	1.5134	26.7396	2.88281e-05	0.000445866
Uba7	1.28939	-0.355573	9.28487	0.00563853	0.0271202
Lct	-1.28771	-0.738962	5.83593	0.0238732	0.0799595
Gemin8	-1.2871	-1.63875	2.4371	0.131886	0.277056
Sh3d19	1.28628	5.02444	57.2474	4.87349e-05	0.000667519
mKIAA0050	1.28596	-0.762875	5.68466	0.0255704	0.0841942
Ccdc114	1.28582	-1.68641	2.5455	0.123994	0.265608
E2f6	1.28555	-1.68754	2.318	0.141252	0.289575
AK013506	-1.28541	-0.591953	6.84928	0.0152667	0.0573636
Zmym1	-1.28356	-1.45825	3.1069	0.0909871	0.213485
Etl4	-1.28215	-0.523299	5.75055	0.0259473	0.0851008
AK005651	1.28134	-1.68589	2.44504	0.131288	0.276259
Lrrc3	-1.281	-1.18821	2.77668	0.113147	0.248206
Tspan6	-1.28081	-1.18754	4.21817	0.0513023	0.139985
LOC100042049	1.28074	2.40686	48.5774	3.75643e-07	1.35218e-05
Zmat1	1.28064	-0.256667	9.78238	0.00465439	0.0235161
Lrguk	-1.28036	0.0687875	12.214	0.0019116	0.0118479
Tpcn2	-1.27876	-0.438259	6.8858	0.0150573	0.0567845
Gpr97	1.27824	-1.37345	2.82583	0.106502	0.238032
Hist1h2ak	1.27791	1.43161	14.4961	0.00218995	0.0131228
Mettl13	-1.27775	0.756302	17.1522	0.000382653	0.00346667
Lyl1	1.27631	1.95723	34.8074	4.77295e-06	0.000102069
BC035044	1.27608	0.832499	15.4698	0.00075669	0.00577655
Itpr2	-1.27493	-1.29737	3.51381	0.0733657	0.181485
C230035I16Rik	-1.27377	-0.0385616	10.7727	0.00320994	0.0178693
Mill2	-1.27342	-0.737756	4.99959	0.0355091	0.107649
Fcer1g	1.27169	2.07025	36.3146	3.51126e-06	8.1647e-05
Bspry	1.27151	3.5174	54.3798	8.20775e-07	2.53888e-05
1700029J11Rik	-1.27146	-1.22314	3.70523	0.0664525	0.168801
Tbc1d10a	1.27051	-1.2966	3.07646	0.0929585	0.217204
Sltm	-1.26954	-0.960141	4.66783	0.0411773	0.119537
AK140437	-1.26939	-0.872372	4.45818	0.0459316	0.129253
Ncf4	1.2692	2.39653	30.3429	3.85621e-05	0.000553271
Kctd12	-1.26806	7.8	185.668	1.69718e-09	1.56064e-07
Golga7	-1.26585	1.24572	22.2441	9.0104e-05	0.00109019
Hist2h4	1.26534	0.329737	14.7611	0.000809674	0.00606656
Rab11fip5	1.26489	2.45786	47.9261	4.18694e-07	1.46038e-05
Dbx1	1.26464	-1.29768	3.05834	0.0935294	0.218235
C920016K16Rik	-1.26202	-0.873159	5.43728	0.0286433	0.0913676
Mef2a	-1.26202	-1.5017	2.62281	0.118705	0.256945
AK003943	1.26116	0.327057	13.4083	0.00126701	0.00859543
Cma1	1.26012	-0.686188	4.1132	0.0594115	0.155864
Bsg	-1.25921	1.36549	26.6426	2.95119e-05	0.000455745
Sgtb	-1.25879	-0.523509	5.42084	0.0306813	0.0962897
Fads2	-1.25745	-1.84569	1.72938	0.201202	0.367161
5133401N09Rik	-1.25402	-1.18865	3.71794	0.0660201	0.168043
6030458C11Rik	-1.25397	-0.00778841	11.2835	0.00266351	0.0153635
Colec11	-1.25384	-1.50093	2.6938	0.11408	0.249712
AK041287	-1.25362	-0.00763963	10.9885	0.00296544	0.0167666
Emilin1	-1.25279	-0.872561	4.71192	0.0403121	0.11793
Cars	1.25216	2.10721	39.0925	2.03534e-06	5.31976e-05
Spon2	-1.25095	-1.08488	4.16558	0.05266	0.142727
Dsg1c	-1.25066	-0.592194	6.29763	0.0194208	0.0689996
Gm5134	1.24987	-0.136265	8.74435	0.00697405	0.0318333
BC051062	-1.24984	0.273745	11.175	0.00279648	0.015954
Nrip1	-1.24942	-1.63813	2.21833	0.149703	0.301043
Fam133b	-1.24878	0.728307	15.8245	0.000576541	0.00467659
AK017620	1.24839	3.07114	42.1509	4.22542e-06	9.45579e-05
Tbcel	-1.24699	0.125365	8.17783	0.0100569	0.0421922
Akap1	-1.24674	-1.33663	3.4061	0.0776158	0.189268
Tsen54	-1.24635	-0.375572	8.35128	0.00816328	0.0359005
Prr7	-1.24442	1.38927	23.5865	6.3344e-05	0.000822496
AK143982	-1.24393	-1.63827	2.47715	0.128903	0.27291
AK053027	-1.2436	-0.61575	6.79406	0.0156346	0.05855
AK005967	-1.24218	-1.086	4.21291	0.0514362	0.140236
4930503B20Rik	-1.24157	-0.376746	6.70164	0.0164862	0.0611281
Idh3a	-1.24063	-1.63818	2.29714	0.142973	0.291214
Spink13	-1.23977	-1.08597	4.00665	0.0570169	0.151173
Atf7	-1.23671	-1.08619	4.24354	0.0506613	0.138647
Klf7	-1.23615	-0.872797	4.93059	0.0363121	0.109184
Chst1	-1.23488	4.91397	140.882	2.12046e-11	4.24787e-09
AK057615	-1.23336	-0.872437	5.04263	0.0344364	0.105224
Dcaf8	-1.23298	1.3638	24.9233	4.50688e-05	0.000628589
B430203M17Rik	-1.23274	2.40751	42.3859	1.10042e-06	3.20771e-05
Miip	1.23159	-0.569043	5.58946	0.0269748	0.0874936
Tmem41b	-1.23033	-0.614808	6.4884	0.0178572	0.0650336
Bcl2l11	-1.22891	0.234685	11.0557	0.00289352	0.016415
Crip2	-1.22834	1.51151	27.3799	2.47272e-05	0.000393264
Qtrtd1	-1.22784	-0.437621	7.45531	0.011801	0.0475568
Abca1	-1.22732	-1.22402	3.1727	0.0878327	0.207625
Fbxl22	-1.22642	-0.0695657	9.63738	0.00492019	0.0245524
Fdps	1.22594	7.84622	268.409	2.50438e-14	1.9486e-11
mKIAA0088	-1.22481	-0.664834	4.50831	0.0457235	0.128889
Itgb7	1.22477	1.11392	19.3724	0.000199067	0.00206731
Osgin2	-1.22453	-0.592114	5.37235	0.0297796	0.094014
AK015423	-1.22422	1.9928	36.3231	3.5053e-06	8.1647e-05
Arpp19	-1.22249	-0.990806	4.54317	0.0437384	0.124976
BC027344	-1.22203	-0.545078	6.15048	0.0207308	0.0723575
Trap1a	-1.22157	1.50728	24.6099	4.87688e-05	0.000667519
Eif4ebp1	1.22127	7.45113	283.929	1.32435e-14	1.11631e-11
mKIAA0225	-1.22038	-0.591282	6.24243	0.0199012	0.0701639
Prmt10	-1.21888	-1.11989	3.97921	0.0578098	0.152715
Dynlt1b	-1.21877	-0.712737	5.99586	0.022214	0.0761449
Ankrd50	-1.21852	5.14475	102.605	9.16304e-09	6.6203e-07
Nup210l	-1.21786	0.721638	16.6464	0.000446536	0.00391736
Slc5a8	-1.21749	-0.990848	4.68261	0.0408848	0.118973
Ticam2	-1.21704	-0.280151	8.48318	0.00774101	0.0345697
Gabpb1	-1.21683	-0.260777	8.93513	0.00646664	0.0301707
RecQ5	-1.21513	-1.3762	2.8843	0.102675	0.232442
Aldh8a1	-1.21371	-0.688027	5.26876	0.030972	0.0970515
Ankrd45	1.21337	-0.354777	7.21344	0.0130674	0.0510855
Hist1h2af	1.21322	-0.392578	3.35405	0.0960297	0.222401
Dgcr8	-1.2125	-0.336459	7.83507	0.0100773	0.0422602
Dgka	1.21248	1.64249	28.8713	1.74303e-05	0.00029287
AK157795	-1.21241	-1.11987	4.07826	0.0550051	0.147151
Angel2	-1.2123	-1.5008	2.576	0.121875	0.262124
AK140234	-1.21204	-0.376755	7.29212	0.0126397	0.0498638
2410075B13Rik	1.21086	-1.90128	1.29603	0.268452	0.445731
9330175E14Rik	-1.20976	0.246877	12.2948	0.0018582	0.0115951
AK162363	1.20932	-0.546426	6.78461	0.0156985	0.058746
AK089379	-1.2091	-0.136675	9.45134	0.00528589	0.025917
Rras	1.20893	2.27934	33.8669	6.19962e-06	0.000126942
Adamtsl2	-1.20856	4.57771	116.153	1.45567e-10	2.04501e-08
Cyp2j6	-1.20814	3.60024	52.3782	8.11669e-07	2.51841e-05
Amigo2	-1.2079	-1.687	1.75806	0.198303	0.363348
Bhlha15	-1.20785	-1.15417	3.52216	0.0730475	0.181141
Tas1r3	-1.20724	0.616332	12.7501	0.00164231	0.0106132
Il2ra	-1.2068	-0.45714	7.02241	0.0141739	0.0539905
A930013F10Rik	-1.20516	0.348875	12.5126	0.00172227	0.0110049
Prr5	1.20456	-0.415222	7.13357	0.013518	0.0521887
Nit1	-1.2039	-0.615148	5.54694	0.027233	0.0880931
Enpep	-1.19992	0.371776	13.3111	0.00130941	0.00882977
Arhgap15	-1.19989	-1.50103	2.70692	0.113249	0.248269
AK144265	1.19964	8.15043	3.67473	0.180903	0.34275
Ubn2	-1.19836	1.54014	27.1484	2.61315e-05	0.000412314
Ppp3ca	-1.19798	-1.68744	1.96616	0.173951	0.33419
Chtf18	-1.19795	-1.68786	1.97274	0.17326	0.333497
Zan	-1.19785	-1.08509	3.72717	0.0657086	0.16767
Hmha1	-1.19756	2.30849	33.5111	6.40814e-06	0.00012912
2700094K13Rik	1.19733	-1.08601	3.37484	0.0792959	0.192297
Msrb3	-1.19648	-1.29848	1.9572	0.181914	0.343562
Tigd5	-1.19259	-1.11827	3.14354	0.0896805	0.210909
Ccdc58	-1.19202	-1.37592	3.05142	0.0937492	0.218647
Hs3st3b1	1.19184	5.87228	116.69	2.40445e-08	1.5013e-06
Prdm9	-1.19103	-1.02241	3.92433	0.0594333	0.155864
Tcf12	-1.18568	0.372609	11.1294	0.0028168	0.016051
Elavl3	-1.18525	-0.478852	6.01132	0.0220605	0.0758471
Snora17	-1.18453	3.98319	86.2442	2.5252e-09	2.18311e-07
AK145144	1.1831	-1.08508	4.14021	0.0533295	0.143857
Zcwpw2	-1.18238	-1.68818	2.02384	0.16801	0.326826
Pafah1b1	-1.18177	1.47642	25.0681	4.34629e-05	0.000611055
Uggt2	-1.18129	0.248763	9.76483	0.00470868	0.0237429
Ankmy2	-1.18101	-0.817597	4.54797	0.0436364	0.12479
Dock10	-1.18036	-0.901038	4.81212	0.0384209	0.114034
D630003M21Rik	-1.17883	1.32096	19.5022	0.000192911	0.00201172
Hmbs	1.17852	0.724851	14.7394	0.000815388	0.00610033
Moxd2	-1.17748	-0.991171	3.72992	0.0656159	0.167475
Trnp1	-1.17678	7.31607	181.598	1.04581e-10	1.51478e-08
Pigq	-1.17664	0.195618	10.2673	0.00387381	0.020558
AK144870	-1.17644	-0.0368725	9.80823	0.00460869	0.0233318
Hdh	-1.17605	-0.591096	5.98001	0.0223726	0.0764692
Hausp	-1.17582	-0.207162	8.13314	0.00891832	0.0383052
Rhob	-1.17512	4.34561	17.7411	0.00941423	0.040061
Scd2	1.17483	12.1758	240.753	7.86515e-14	4.97225e-11
Otud1	-1.17404	1.00958	14.1761	0.00113035	0.0078705
Leap2	1.1738	-0.989616	3.56593	0.0717923	0.178832
Metap2	-1.1734	0.0535188	9.47963	0.00522842	0.0257476
Ccdc19	-1.17282	1.98973	33.1667	6.73064e-06	0.000134546
BC027670	-1.172	1.37785	20.8619	0.000131048	0.00146147
Ccl5	1.17147	-1.18786	3.60943	0.0698145	0.175055
Rhcg	-1.17052	-1.11843	2.79177	0.110279	0.243659
Hr	-1.16811	-0.120029	8.78565	0.00686059	0.0315106
Praf2	-1.1677	0.194645	10.9804	0.00297428	0.0168048
R3hdm1	-1.1653	0.871424	15.953	0.00055373	0.00454625
BC020402	-1.16402	0.485704	12.3252	0.00183855	0.0115009
CLCN3	-1.1635	-0.00619253	9.01823	0.00625843	0.0293284
Aen	-1.16335	-1.11888	3.79077	0.0636055	0.163958
Hist1h2bj	1.16242	0.212856	10.3609	0.00374029	0.020124
Lars2	1.16167	10.186	5.20073	0.135879	0.282503
Met	-1.16019	0.56146	12.3186	0.00184282	0.0115169
Isg15	1.16019	2.62554	41.7815	1.22891e-06	3.51141e-05
Sirt1	-1.15992	-1.37504	2.94183	0.0994949	0.227536
AK081879	-1.15915	0.2493	9.86742	0.00450586	0.0229379
AK020588	1.15887	-1.33607	2.56895	0.122399	0.262915
AK011684	-1.15838	-0.663243	4.48546	0.0455759	0.128671
Hunk	1.15833	-0.435691	7.09268	0.0137553	0.0528226
Prlr	-1.15705	-1.25885	2.69371	0.11417	0.249801
Ppp2r2a	-1.15674	-1.37475	2.82526	0.106061	0.237711
AK166159	1.15672	0.531401	13.448	0.00125015	0.00850386
Asb5	-1.15632	-0.500652	6.43683	0.0182657	0.0660792
mVps16	-1.15602	-1.26035	3.07927	0.0923506	0.215933
Usp15	-1.15596	0.298634	11.5358	0.00243192	0.0142272
Igsf3	1.1541	-1.45822	1.86833	0.187691	0.351405
AK045643	1.15351	1.89323	30.4702	1.2119e-05	0.000218899
Luc7l3	-1.15311	1.86647	25.5632	3.84275e-05	0.000552591
Tubb2b	-1.15273	3.36868	61.6475	5.14685e-08	2.78514e-06
AK086315	-1.15252	2.33833	38.3006	2.37147e-06	5.93749e-05
BC018507	-1.15125	-0.0057436	9.59002	0.00501057	0.0248929
AK164124	-1.14955	1.01716	18.0531	0.000292178	0.00281197
Chka	-1.14898	1.11288	18.0037	0.00029648	0.00284526
A230073K19Rik	-1.14819	-0.207929	4.01018	0.0666149	0.169129
mKIAA0532	-1.14761	-0.0696207	9.13658	0.0059745	0.0283452
Pcgf6	-1.14758	0.773995	14.4704	0.000890092	0.00653833
Ankrd22	1.14598	2.09409	29.8839	1.38284e-05	0.000242837
Piwil2	1.14539	-0.521037	6.44389	0.0182091	0.0659452
AK084270	-1.14505	-1.5459	2.18127	0.152999	0.305484
Ndufs2	-1.14495	-0.261589	6.64806	0.0166555	0.0615081
Col9a3	-1.14494	6.14907	187.512	1.11415e-12	4.17395e-10
Gpr25	-1.14433	3.60643	59.2095	7.27439e-08	3.67902e-06
Ccdc132	-1.14385	-0.118787	8.90276	0.00654979	0.0304183
H2-Eb2	1.1436	4.14872	89.4127	1.80201e-09	1.62744e-07
AK204442	-1.1434	-1.0223	3.44515	0.0760433	0.186377
Dnahc10	-1.14272	-0.81759	3.74742	0.0658454	0.167832
Ccr7	1.14242	3.01482	52.2875	2.06263e-07	8.49461e-06
AK145430	1.14229	-1.08593	3.44087	0.0762137	0.186704
Trpv2	-1.14219	-0.242421	7.79266	0.0102553	0.0427585
AK028852	-1.14187	0.196228	8.73873	0.00713322	0.0323409
St6gal2	-1.14102	3.0525	49.5935	3.17781e-07	1.18611e-05
Cux1	-1.14041	-0.187929	8.25201	0.00849776	0.0369605
Apba1	1.14027	-1.73753	1.54568	0.226508	0.396183
Ceacam16	1.1402	0.156602	9.15134	0.00594263	0.028247
Layn	-1.1395	-1.25983	2.93575	0.0998255	0.227931
BC023483	-1.13936	4.18253	86.0501	2.57874e-09	2.2105e-07
Rabl3	-1.13927	-0.845361	4.75549	0.0394771	0.116113
AK157914	-1.13914	-0.59231	5.73332	0.0250103	0.082754
Pkn1	-1.139	0.766934	15.7288	0.000594181	0.00478896
Ly6c2	-1.13852	-0.437137	5.67055	0.0257472	0.0846386
AK153014	-1.13643	-0.961718	3.24968	0.0848501	0.202276
mKIAA1300	-1.13612	1.02286	17.3444	0.000361052	0.00331401
Tbx15	-1.13607	-1.37501	2.42389	0.132888	0.278338
4930473A06Rik	-1.13603	-1.37568	2.38843	0.135621	0.282149
FBP11	-1.13551	-0.737859	4.45856	0.0455786	0.128671
Mbnl2	-1.13489	-1.6868	1.67758	0.207884	0.374879
mKIAA0595	-1.13357	1.28395	18.9335	0.000225845	0.0022913
Hist2h3b	1.1333	-0.238339	7.26514	0.0127846	0.0502591
BC062895	-1.13293	-0.437633	6.10174	0.0211861	0.0734901
Ift20	-1.13291	-0.845357	4.59018	0.042752	0.122991
Pld3	-1.13255	-1.15326	3.41789	0.0771371	0.188469
Anxa7	-1.13252	-0.437863	6.42554	0.0183565	0.0662418
Cenp-a	-1.13201	-0.930711	4.058	0.0555661	0.148377
EG382421	-1.13185	-0.241794	7.88767	0.00986127	0.0415438
Efcab5	-1.13183	-1.25963	3.15627	0.0886085	0.208971
Fam46c	-1.13138	3.61464	35.6728	3.9657e-05	0.000566568
2610109H07Rik	-1.13123	0.701129	10.6963	0.00362424	0.0196564
Tnfrsf1b	-1.13025	1.06054	16.9464	0.000407362	0.00364991
AI464131	-1.13004	0.0404368	8.4304	0.00790704	0.0350788
Ppm1d	-1.12998	-0.592269	5.60461	0.0265226	0.0865129
Atp2a1	-1.12862	-0.524014	5.81375	0.0241141	0.0805261
Cd2	1.12595	-1.59067	1.91197	0.179768	0.341282
Sorl1	-1.12507	0.876523	16.1869	0.000514731	0.00432434
Rhof	1.12491	-0.295891	7.11245	0.01364	0.0525539
AK153660	-1.12433	0.0229461	9.00251	0.00629724	0.0294755
AK141411	-1.12418	3.19562	54.596	1.44189e-07	6.33185e-06
Xkrx	-1.12357	-0.375548	6.54074	0.017453	0.0638469
AK011897	-1.12342	-0.764302	4.6639	0.0412553	0.119681
Eri2	-1.12216	-1.68724	1.96426	0.174151	0.334414
AK045970	-1.122	1.04478	15.3974	0.000659964	0.00519497
AK142001	-1.12108	0.624274	13.966	0.00105109	0.00741408
Stk39	1.11966	-0.990876	3.73414	0.0654741	0.167228
Rsrc1	-1.11652	1.04572	17.1202	0.000386383	0.00349264
AK154077	-1.11377	0.709093	13.5579	0.00120472	0.00826711
mKIAA0074	-1.1137	-1.41675	2.36502	0.137463	0.284925
Map2k7	-1.11325	-1.54559	2.10031	0.160507	0.3166
AK041463	1.11242	-1.78902	1.64144	0.212649	0.380698
Ino80e	-1.11161	0.4316	10.7033	0.00329329	0.0182787
Pus3	-1.11133	-0.7637	4.67103	0.0411138	0.119467
AK189470	-1.11112	2.87172	40.3065	1.61632e-06	4.38312e-05
Trpm2	1.11108	2.25224	34.8412	4.7398e-06	0.00010179
Nucb1	-1.111	-0.764395	4.49147	0.0448528	0.127368
Hist1h2bf	1.11077	-0.544102	5.37975	0.0294156	0.0931765
AK169507	-1.10966	-1.29822	2.85129	0.104552	0.235323
AK005477	-1.10898	-0.336541	7.02212	0.0141756	0.0539905
Gpc3	-1.10897	0.641784	3.22043	0.121486	0.261398
Epb4.1	-1.10711	0.886802	14.3054	0.000939574	0.00679377
Lpar5	1.10681	-0.929948	3.7494	0.0649645	0.166309
Chchd7	-1.10653	-1.54526	2.01109	0.169302	0.328629
Tmem87a	-1.10636	0.700773	13.7351	0.00113521	0.00788108
Il17ra	-1.10407	-0.316117	6.99672	0.0143304	0.0545343
Zmat3	-1.10354	7.39086	139.257	8.57429e-09	6.23949e-07
AK134928	-1.10271	-0.546116	5.77182	0.0245767	0.0816765
Dnahc2	-1.10257	-1.54582	2.08042	0.162419	0.31919
Hist1h4n	1.10238	-1.25832	2.67538	0.11526	0.251532
Ube2g1	1.10217	-1.33614	2.81337	0.106759	0.238381
Gpr157	-1.10123	-0.224526	7.10895	0.0136603	0.0525576
AK083252	-1.09941	-0.71383	4.49066	0.0448705	0.127383
Supt7l	-1.09908	-0.546251	5.43089	0.0287279	0.0915799
Myo1a	-1.09834	-0.961111	3.83839	0.0620808	0.161095
Cyp11a1	1.09824	3.4496	23.8449	0.000687206	0.0053635
Nrp	-1.09822	1.91857	23.7597	6.07961e-05	0.00079734
AK085438	-1.0968	0.236609	10.3655	0.00373379	0.0200997
Pml	-1.09589	0.794932	12.5778	0.00168368	0.0108199
Gm9897	1.09507	0.129735	9.63777	0.00491945	0.0245524
Uchl1	-1.09496	0.140911	4.56618	0.0542401	0.145566
Hoxb3	1.09391	-0.544102	5.4556	0.0284021	0.0907701
Arhgef7	-1.09265	0.311458	10.4236	0.00365364	0.0197432
Efcab4b	-1.09015	2.87642	40.1803	1.65516e-06	4.47646e-05
AK021325	-1.08913	-0.152534	7.6598	0.0108357	0.0445539
A130049A11Rik	-1.08772	-0.356087	4.43639	0.0494362	0.136179
mKIAA0164	-1.08745	-1.41594	2.25765	0.146299	0.29587
Rab23	-1.0873	-0.102533	7.69778	0.0106661	0.0440359
Tomm40	-1.08721	0.508345	11.2227	0.00272289	0.0156025
Ptcd3	-1.08693	0.801378	14.0018	0.00103869	0.00735227
Ass1	-1.08664	6.95327	202.434	4.97948e-13	2.18989e-10
Clec2d	1.08614	4.01826	70.7731	1.53326e-08	1.03393e-06
Abra	1.08476	4.35662	10.1058	0.0407097	0.118702
Npc1	-1.08351	8.18726	231.435	1.20035e-13	6.39026e-11
Stxbp3a	-1.08345	-1.41627	2.38974	0.135519	0.281995
Lck	-1.08342	-0.17199	7.64629	0.0108967	0.0446777
Tmem194	-1.08337	-0.102473	7.36422	0.0122613	0.0489243
Tect1	-1.08334	-0.991726	2.95949	0.0989482	0.226439
Gm10778	-1.08196	-0.613636	5.18058	0.0322745	0.100028
Foxo1	-1.08057	7.39433	230.225	1.26951e-13	6.42057e-11
Nsg2	-1.0801	2.69626	37.7686	2.63099e-06	6.49732e-05
Zfp280d	-1.07865	-1.54486	1.43243	0.246773	0.420292
Hic1	-1.07844	-1.4162	2.46551	0.129762	0.274189
Parp10	-1.07831	-0.872406	3.8932	0.0603772	0.15793
Gpt2	1.07772	-1.15242	3.03525	0.0945721	0.220135
AK048941	-1.07687	0.384797	11.124	0.00282236	0.0160654
Krt2	-1.07618	-0.661455	4.4781	0.045146	0.127878
Lsm6	-1.07544	-1.02364	2.78359	0.108989	0.241919
Chuk	-1.0751	-1.4157	2.42655	0.132686	0.278043
BC023719	-1.07489	-1.15284	1.8871	0.188838	0.353002
AK078239	-1.0748	-0.872582	4.0215	0.0565929	0.150332
Gns	-1.07472	-0.298399	6.33556	0.0190982	0.0680924
AK136863	-1.07424	0.959153	13.4929	0.00123137	0.0084101
Btbd12	1.07367	-1.33589	2.3196	0.141121	0.289534
Tnfsf4	-1.07312	2.69019	7.71441	0.0359905	0.10854
Lmo4	-1.07239	-1.416	2.38993	0.135504	0.281995
Wdr7	1.07207	-1.63734	1.77188	0.195943	0.360881
Spin4	1.07194	2.96175	41.6832	1.25132e-06	3.5454e-05
Kif26b	-1.07119	7.01691	216.899	2.3968e-13	1.15446e-10
Zfp280c	-1.07041	-1.41684	2.31837	0.141222	0.289575
2310044G17Rik	1.0682	-1.37479	2.53985	0.124392	0.266121
Ppard	1.06786	5.26019	112.416	2.0062e-10	2.7057e-08
Fksg24	-1.06694	-1.41546	2.32787	0.140446	0.288449
Ascl3	-1.06645	-1.29739	2.51553	0.126119	0.268794
Prdm8	-1.0659	2.44261	29.688	1.44565e-05	0.000252116
Slc43a1	1.06552	-0.872782	3.55963	0.0716389	0.178524
Slc35d3	-1.06511	-1.29707	2.35942	0.137908	0.285464
Hnrnpr	-1.06391	0.408034	5.46735	0.0360712	0.108671
Mrgpra1	1.06385	-1.79002	1.35342	0.25638	0.431638
Itfg3	-1.06327	-0.416382	6.00178	0.0221551	0.0760634
Gpc1	-1.0627	-1.41603	2.04147	0.166243	0.324654
Akap8	-1.06088	-0.438407	4.9479	0.036015	0.108582
4921531C22Rik	1.05993	0.617725	12.1108	0.00198221	0.0121002
Gm11744	-1.05952	-1.73797	1.43235	0.243337	0.416238
Yipf2	-1.0595	-0.929224	2.88305	0.103445	0.233455
Ndrg3	-1.05894	-0.296589	6.27169	0.0196449	0.0695513
Snora24	-1.05742	1.32997	18.517	0.000254915	0.00250337
Cdh13	-1.05704	0.0387571	7.31094	0.0125397	0.0496629
L1cam	-1.05702	0.8806	11.7546	0.00227156	0.0135079
Csnk1g1	-1.05659	0.881234	14.3549	0.00092442	0.00672699
Ralgps1	1.05527	-1.05219	3.40419	0.0776935	0.189366
Crlf2	1.0551	-1.1519	2.94373	0.0993921	0.227352
Gabpb2	-1.05439	-0.638669	4.66744	0.0411849	0.119537
Trmt1	-1.0543	1.06656	12.238	0.0021068	0.0127103
AK016335	1.05414	-0.871633	3.92999	0.0592633	0.155661
Rgl1	-1.05384	2.92971	40.7644	1.4835e-06	4.09988e-05
Kdm2a	-1.05225	-1.08613	2.25598	0.149395	0.300484
Snord95	-1.04988	-0.712519	4.61554	0.0422304	0.121872
B230206F22Rik	-1.04916	0.299478	9.58458	0.00502108	0.0249084
Morn1	-1.04834	-0.686771	4.33987	0.0483091	0.134133
Fam167b	1.04793	-1.3755	2.37043	0.137035	0.284389
R3hdm2	1.04728	-1.15228	2.6997	0.113706	0.249135
5430427O19Rik	1.04685	-0.566706	5.04643	0.0343748	0.105109
C1ra	-1.04643	-0.0221301	7.56862	0.0112549	0.0457386
Pcdhb17	-1.04622	-0.0366959	7.06239	0.013934	0.0533637
Zdhhc3	-1.04515	-1.41598	2.03218	0.167171	0.326011
Eid3	-1.04396	0.748934	9.86493	0.00491602	0.0245524
AK142089	-1.04392	-0.241173	6.57767	0.0171739	0.0630998
AK076606	-1.04307	1.93291	24.9886	4.43373e-05	0.000622014
BC029853	1.0429	-1.63827	1.5812	0.220964	0.389936
Mier1	-1.0425	0.661854	11.8246	0.00219352	0.0131365
AK005591	1.04111	-0.872677	2.60366	0.124051	0.265617
Usp5	1.03968	-1.18568	2.58819	0.12104	0.26066
Cdkn1a	-1.03907	-0.818048	3.97685	0.0578784	0.152777
Rps17	1.03835	-0.789702	3.78364	0.0638373	0.164381
Phf10	1.03832	2.31962	29.3889	1.54762e-05	0.000268051
1700049G17Rik	1.03765	-0.206075	6.94671	0.0146407	0.055527
Cebpb	1.03646	3.93638	57.9249	8.76597e-08	4.25677e-06
Tbc1d5	1.03589	1.28965	18.4852	0.000257296	0.00252185
Nfrkb	-1.03572	-1.29698	2.3458	0.138997	0.286695
Gsdmc4	1.0356	-0.871856	3.86046	0.0613883	0.159708
Fth1	-1.03534	12.452	77.8622	1.16149e-05	0.000211684
Ints10	-1.03514	-0.791133	3.7852	0.0637866	0.164299
Sema4g	-1.03403	-1.08522	2.90293	0.101632	0.23091
Wdr66	-1.03387	0.287341	9.42002	0.00535035	0.0261696
Mov10	-1.03383	-0.638156	4.77196	0.0391667	0.115434
3830403N18Rik	1.03281	-1.63805	1.49582	0.23358	0.404185
Sik2	-1.03239	-1.29644	2.45601	0.130468	0.274976
Rnf111	-1.03217	-0.500808	5.29234	0.0306339	0.0962006
Tmem104	-1.03213	-0.296485	5.57129	0.0269305	0.0874203
Gimap7	1.03161	1.80183	24.085	5.5726e-05	0.00074658
Zc3h18	-1.03155	-0.791341	3.84586	0.0618453	0.160648
Slc5a3	-1.03125	5.46969	128.678	5.27421e-11	8.74567e-09
Rbm34	-1.03119	-0.0383886	7.69075	0.0106973	0.0441205
Slc25a42	-1.03118	-0.567516	4.94365	0.0360877	0.108671
Col4a2	1.03008	0.112208	7.47106	0.0117234	0.0473004
AK041746	1.02878	-1.15233	2.8867	0.10254	0.232293
AK030646	-1.02874	1.67627	18.9149	0.000227058	0.00229977
Wdr36	-1.02804	-0.990908	3.19795	0.0866559	0.205419
Sft2d1	-1.02771	-0.713897	4.10046	0.0543979	0.145873
Luc7l2	-1.0272	1.63387	20.2638	0.000154713	0.00168272
Trim31	-1.02657	-0.458701	4.71065	0.0403367	0.117955
Zmynd12	-1.02602	0.828476	12.086	0.0019996	0.0121917
Izumo4	1.0253	-1.15281	2.87909	0.102968	0.232847
Grik3	-1.02451	0.261003	8.53108	0.00759367	0.0340621
Med13l	-1.02251	0.180297	8.56286	0.00749761	0.0336611
1700020N01Rik	-1.02221	-0.437195	4.69069	0.040726	0.118716
Pate2	-1.02116	-0.0855797	7.30246	0.0125846	0.0497435
Zfp653	-1.02056	-0.738823	4.04062	0.0560525	0.149399
Bax	-1.02044	3.62708	50.9156	2.56529e-07	9.9651e-06
AK087376	-1.02015	0.862876	12.6015	0.00166992	0.0107587
Cntd1	-1.01991	-1.18727	2.31387	0.141629	0.289714
Agbl3	-1.01886	-0.817078	3.92452	0.0594277	0.155864
AK164850	-1.01878	-0.872222	3.61749	0.0695246	0.174588
Ccnd3	-1.01831	1.45308	18.0771	0.000290107	0.00280003
Zfp82	-1.01804	-0.688423	3.76	0.0646131	0.165668
Gm514	-1.01671	-1.33618	2.35578	0.138198	0.285689
Mamdc4	1.01653	0.704986	10.8708	0.00309621	0.01737
AK160408	1.01652	-0.393993	5.39888	0.0291563	0.0926242
1700084E18Rik	-1.01613	-1.11962	2.47692	0.12892	0.27291
Wisp2	-1.01548	-1.08586	2.74365	0.110959	0.244786
BC050122	1.01356	1.01273	12.6902	0.00161941	0.0105076
Srsf11	-1.01166	1.8935	22.3857	8.67691e-05	0.00105362
Arhgef19	-1.01124	-0.260008	6.1265	0.0209535	0.0728512
Coq6	-1.01073	-1.50205	1.75643	0.197835	0.362893
Snord35a	-1.01015	0.0226206	7.14647	0.0134441	0.0520008
Ufl1	-1.00961	-1.22401	2.06801	0.16432	0.321862
Lass6	-1.00937	3.34068	44.3657	7.71894e-07	2.41725e-05
Cytip	1.00905	6.60459	10.9636	0.0568484	0.150806
Uspl1	-1.00871	1.34186	17.8202	0.000313084	0.00296799
1700102P08Rik	-1.00756	-0.818121	3.76118	0.0645741	0.165615
Ier2	1.00732	6.58409	160.601	5.56819e-12	1.40806e-09
Iqsec1	1.00725	-0.661944	4.45476	0.0456634	0.128766
Smug1	-1.00647	0.990968	13.1255	0.00139467	0.00931778
Ino80d	-1.00632	-1.5911	1.73802	0.200118	0.365773
AK041589	1.00598	-1.50013	1.97119	0.173423	0.333714
Rg9mtd2	-1.00468	-1.02187	2.83574	0.10545	0.236818
Irf8	1.0044	3.83722	59.4229	7.05455e-08	3.60388e-06
Sgms1	-1.00427	-0.736924	3.72419	0.0658092	0.167832
AK136276	-1.00425	-1.73754	1.45939	0.239066	0.41118
Gtf2a2	-1.00411	1.0814	14.8175	0.00079502	0.00598335
Ccng1	-1.00385	9.9594	27.7666	0.00716421	0.0324523
AK140218	-1.00299	-0.205959	6.36496	0.0188523	0.0675012
Pik3r5	-1.00291	6.57543	127.573	5.41973e-10	6.37449e-08
Sc4mol	1.00244	6.51442	172.119	2.72151e-12	7.64669e-10
Celf2	-1.00241	-0.59017	4.35314	0.047995	0.133407
Zfp862	-1.00236	-1.59042	1.57199	0.22227	0.391207
Vgf	-1.00218	-1.59123	1.70527	0.204262	0.37027
Hist1h2bp	1.00207	-1.63809	1.70052	0.204871	0.371042
AK079994	-1.00199	-1.22386	2.55758	0.12315	0.264191
Cytor4	-1.00184	-1.33469	1.92897	0.177935	0.339204
Pisd-ps1	-1.00167	0.299596	7.10592	0.0140947	0.053779
Tmc6	-1.00107	-1.45762	1.80415	0.192064	0.356528
Mrc1	-1.00103	-0.299497	4.63981	0.0423153	0.122047
AK016731	0.999802	-0.186892	6.49269	0.0178237	0.0649447
Zfhx2as	-0.999272	-0.901231	3.09526	0.091559	0.214628
Scn2a1	-0.997544	1.39689	16.8874	0.000414751	0.00369728
AK162599	-0.995245	0.476217	10.0223	0.00424856	0.0219938
Tars2	-0.994958	0.901546	7.58806	0.0144172	0.0548029
Tmem107	-0.994225	-0.3367	5.36449	0.0296244	0.09367
Snora44	-0.994191	0.688962	9.43472	0.00534483	0.0261568
BC002288	-0.993121	1.77411	21.7087	0.000104021	0.00121638
8430429K09Rik	-0.992882	-0.396508	5.15774	0.0326218	0.100815
Zfp629	-0.992469	-1.22332	1.92771	0.179264	0.340838
AK191425	-0.992345	-0.615609	4.15838	0.0528491	0.143162
4930544O15Rik	-0.992325	-1.59099	1.3437	0.258812	0.434937
Ccdc157	-0.99228	-1.45774	1.95636	0.174985	0.33535
Ppm1m	0.992217	-0.990041	2.45673	0.13175	0.276943
AK079804	0.991787	-0.354535	5.54852	0.0272133	0.0880841
Eya2	0.991138	0.33928	8.90461	0.00654501	0.0304101
Lsm7	-0.990181	0.16734	6.30769	0.0197759	0.0698808
Ankrd24	0.989741	-0.842923	3.62594	0.0692217	0.174023
Mdm2	-0.989419	0.800284	8.27719	0.00987557	0.0415867
Slc5a5	-0.989189	0.323933	8.78414	0.0068647	0.0315106
Rab31	-0.987689	-0.522105	4.76748	0.039251	0.115616
Zbtb38	-0.98705	-1.22354	2.4281	0.132567	0.278015
AK162911	-0.985928	-0.638744	3.86111	0.0613682	0.159696
Palm	-0.985628	-0.568728	3.72154	0.0660211	0.168043
A630042L21Rik	-0.985257	-1.3359	2.21024	0.150415	0.301795
AK050838	-0.983341	-1.59072	1.52775	0.228684	0.398886
Ubap2l	-0.983144	1.64284	19.6941	0.000181638	0.00191782
AK076978	-0.982342	-0.931102	3.27617	0.0831237	0.198817
Chchd8	0.981901	3.10161	33.7416	6.19028e-06	0.000126942
Slc2a8	0.981694	-0.991027	2.97545	0.0976898	0.224524
DQ704011	-0.981408	-0.170082	6.2787	0.019584	0.0693601
4922505G16Rik	-0.980858	-1.02168	2.98417	0.0972279	0.224074
Creb3l2	0.979927	5.4252	60.3298	3.02461e-06	7.30164e-05
Psen1	-0.979823	-0.523152	4.11179	0.0540909	0.14532
AK170612	-0.979706	-0.818229	3.25561	0.0840355	0.200618
Synpo2	0.979656	1.73366	20.8452	0.000131653	0.0014666
Sdccag1	-0.97951	-0.118638	5.87588	0.0234462	0.0790266
Golim4	-0.979167	-1.33574	2.1864	0.152538	0.304804
E2f5	0.979005	2.50046	30.8769	1.10688e-05	0.000204682
Galk1	0.978563	7.48238	199.625	5.77057e-13	2.33477e-10
Nsmce1	0.978213	5.95028	120.496	1.04829e-10	1.51478e-08
Rbm42	-0.977854	-1.45807	1.82456	0.189659	0.353817
Morf4l2	-0.976586	1.26726	15.5958	0.000619673	0.00493429
Heatr6	-0.976583	-0.0223836	6.31081	0.019308	0.0687679
Acly	-0.97578	-1.59063	1.65044	0.211441	0.379072
Wdr37	-0.9743	-0.662199	4.12549	0.0537223	0.144637
Hesx1	0.973145	1.13542	12.4899	0.00173587	0.0110639
MAT2B	-0.972845	0.323307	8.21464	0.00862759	0.0373913
Kcnd1	-0.972829	-0.0701722	6.6598	0.0165707	0.0613068
Gclm	-0.972245	7.90507	176.277	2.12375e-12	6.31816e-10
AK019237	-0.971728	-1.22444	2.33779	0.139642	0.287373
1600012H06Rik	-0.970681	-1.90059	0.941009	0.341915	0.520599
Cenpk	-0.969759	-1.02125	2.81735	0.106524	0.238032
Mthfd2	0.968979	9.33905	174.522	2.35655e-12	6.81043e-10
Spsb3	-0.96825	-1.22344	2.42361	0.132909	0.278338
Tia1	-0.968103	1.13309	13.8714	0.00108471	0.00759825
Dyrk1a	-0.967745	-0.93082	3.08941	0.0918478	0.215105
Tacc3	-0.966835	1.32305	15.265	0.000688435	0.00536894
Chst10	-0.966252	-1.02329	2.73719	0.111358	0.245506
Gm4013	-0.965655	0.407886	9.04265	0.00619865	0.0291219
AK143856	-0.965497	-0.223454	5.92999	0.0228813	0.0776696
mDEAH9	-0.965437	1.74138	19.5471	0.000189388	0.00198103
Scn3a	-0.965075	0.0969602	5.3449	0.0317882	0.0988708
AK076318	0.964428	2.3595	26.0955	3.37111e-05	0.000501508
Kcnh2	-0.964066	-1.22261	2.07662	0.162787	0.319665
Ttc28	-0.963228	2.58434	27.122	2.62969e-05	0.000413676
pcm-1	0.96292	0.337954	8.92918	0.00648184	0.0302081
Sell	-0.962439	-1.22377	2.31579	0.141433	0.289714
Arhgap17	-0.962252	-1.11904	2.51846	0.125909	0.26846
Ikzf1	-0.962091	1.29212	15.8004	0.000580916	0.00469701
Cytb	-0.961609	12.0674	183.154	1.42488e-12	4.96989e-10
AK202078	-0.961604	-1.37588	1.7989	0.192688	0.357169
AK141620	0.959824	-1.18762	2.48521	0.128313	0.272264
Stap2	0.958686	-0.991376	2.97824	0.0975416	0.22449
Mtap7d1	0.958683	1.53033	16.5002	0.000467092	0.00403377
AK157878	0.958242	0.859431	10.4662	0.00359613	0.0195564
Mast3	0.957542	0.312126	8.45921	0.00781594	0.0347968
Slc7a5	0.957381	11.0594	160.525	5.82839e-12	1.43791e-09
Xpo6	-0.956205	0.984759	11.5737	0.00239909	0.0140595
L3mbtl	-0.955831	-1.59035	1.59732	0.218699	0.387656
Snhg10	-0.955258	0.975601	12.6168	0.00166106	0.0107153
Dmgdh	-0.955225	-1.50164	1.53646	0.227404	0.397338
Tex261	-0.954805	0.219821	7.12943	0.0135418	0.0522607
Rgs13	-0.95287	1.99806	21.6259	0.000106376	0.00124105
Rcc1	-0.952569	0.828829	11.1794	0.00276609	0.0158073
Insl6	-0.950064	2.98735	35.2575	4.35113e-06	9.58859e-05
BC094633	-0.949484	-0.376808	4.91943	0.0365052	0.109635
Tigit	0.949045	-1.29632	1.42585	0.24845	0.421939
AK141205	-0.948561	-1.37622	1.95928	0.174677	0.335012
Smpdl3b	-0.947887	1.25219	14.754	0.000811554	0.00607615
2010000I03Rik	-0.94761	-0.791336	3.02342	0.0951799	0.221066
AK034671	-0.947586	-0.188366	5.86499	0.0235618	0.079205
Acd	-0.946481	-0.686793	3.76701	0.0643819	0.165327
Dctn4	-0.945543	0.349702	7.38545	0.0121523	0.0485468
Atf5	0.945413	3.53163	45.0344	6.86405e-07	2.20412e-05
Hddc3	0.944576	0.237898	7.14693	0.0134414	0.0520008
Ctrl	-0.944442	-0.764492	3.2268	0.0853334	0.203237
Lars	0.942242	9.3432	150.153	2.35978e-11	4.59023e-09
Elp2	-0.94116	0.141299	7.32463	0.0124675	0.0494595
Phf1	-0.940919	-1.054	2.47477	0.129078	0.273029
Gm9199	-0.940571	-1.37541	1.90616	0.180405	0.34224
A230056P14Rik	0.939741	0.664254	9.55804	0.00507265	0.0251273
Wdr65	-0.939249	-0.00569636	5.91774	0.0230079	0.0778864
Snhg7	-0.937844	3.76466	46.5118	5.31813e-07	1.80513e-05
Mfsd2a	0.9378	5.25686	98.272	7.36429e-10	8.18569e-08
Adpgk	-0.937498	0.114499	6.85116	0.0152543	0.0573556
Tmem20	-0.93707	1.67589	15.1084	0.000734147	0.00564278
Atp1b2	-0.93621	3.39665	40.5813	1.53512e-06	4.19669e-05
AK163149	-0.935967	0.179626	6.96167	0.0145471	0.055255
Cchcr1	-0.935225	-0.437964	4.65945	0.041344	0.119895
Rilp	-0.935207	-0.502584	4.11499	0.0540046	0.145204
Trrap	-0.934064	10.4452	181.648	1.55328e-12	5.23713e-10
Serac1	0.934016	-1.54442	1.61167	0.216707	0.385439
Lnx1	-0.933578	-1.33547	1.75622	0.19786	0.362893
Eri3	-0.933377	0.777936	9.69578	0.0048112	0.0241395
DQ712046	0.933238	-0.277535	4.71424	0.0402672	0.117888
AK148313	-0.932697	-0.416189	4.59518	0.0426487	0.122904
Zfp160	0.932612	-1.54479	1.58482	0.220451	0.389629
Inpp5b	0.932167	1.24443	13.4025	0.00126949	0.00860648
Fam175a	0.931875	-0.0837708	6.05203	0.0216619	0.0746963
Atg16l2	0.931869	-1.54461	1.58226	0.220813	0.389923
Pmvk	0.931646	2.21147	23.4653	6.53624e-05	0.000837948
AK077682	-0.929794	0.167974	7.1855	0.0132231	0.0514824
Serhl	-0.928914	-0.990871	1.94496	0.178735	0.340215
9130024F11Rik	-0.927883	-0.960955	2.82206	0.106248	0.237711
Nup107	0.927335	-1.54478	1.63433	0.213609	0.381704
Cym	0.927143	-0.711261	3.4162	0.0772053	0.18854
Khk	-0.926656	4.30206	64.1084	3.66659e-08	2.10725e-06
Rpl10	-0.92602	0.335323	7.26293	0.0127965	0.0502863
Myo18a	0.925954	0.420133	8.35523	0.00815026	0.0358746
Igfbp6	0.925675	3.39831	33.448	7.72023e-06	0.000151338
Stard7	-0.925568	0.374691	8.32594	0.00824727	0.036113
Sra1	0.924006	-1.68722	1.28059	0.269226	0.44643
Leprel1	0.92359	-1.54468	1.42799	0.244035	0.417106
Lysmd2	0.923514	-0.844324	2.83481	0.105505	0.236888
Vpreb1	-0.923107	-1.63833	1.3621	0.254902	0.429793
Scn4b	-0.92258	6.47127	148.873	1.21075e-11	2.84807e-09
Chgb	-0.922505	-1.6386	1.22856	0.278923	0.457337
Jund	0.922482	6.39972	82.5002	2.34386e-07	9.29732e-06
53BP1	-0.922344	-1.37573	1.79322	0.193366	0.357765
Hip1r	0.920971	7.42299	79.8435	1.61606e-06	4.38312e-05
Sfrs16	-0.920793	0.508873	7.65013	0.0108793	0.0446739
Rcor2	0.920745	-1.0212	2.75348	0.110355	0.243774
AK030777	-0.920681	-1.1194	2.16301	0.154655	0.308001
Smek1	-0.919806	-1.15282	2.35324	0.138401	0.285932
BC049259	-0.919741	-0.317936	4.78474	0.0389277	0.114998
AK135560	-0.919532	-1.50114	1.59717	0.21872	0.387656
Ptges	0.919336	-0.615151	3.38432	0.078509	0.190918
5031425F14Rik	0.91923	2.6233	28.0372	2.11675e-05	0.000345025
AK017706	-0.918653	-0.458711	3.54431	0.0723358	0.17995
Qk	-0.918262	1.04719	12.1252	0.00197224	0.0120723
G5pr	-0.917249	-1.25957	2.09149	0.161351	0.3176
14-3-3 gamma	-0.916161	0.652896	9.33137	0.00553751	0.0268385
Acot8	-0.915922	0.298891	6.95019	0.0146189	0.055465
AK043516	-0.915555	0.32499	6.7521	0.0159207	0.0594456
Gys2	0.915489	0.722103	9.36278	0.00547039	0.0265896
AK013680	0.915474	-0.789073	2.85424	0.104383	0.234994
Trim69	-0.915276	-0.960041	2.71613	0.112669	0.247539
Rhbdl1	-0.914964	2.00691	16.5126	0.000480999	0.00411268
AK078321	-0.91437	-0.500342	3.818	0.0627285	0.162182
mKIAA2030	-0.914234	0.0686236	6.45764	0.0180996	0.0656664
inv	0.913676	-0.394135	4.27492	0.0498812	0.137143
BC048644	0.913194	-1.22196	2.12523	0.15815	0.313357
Sel1l	-0.913033	-0.711973	2.94915	0.0991175	0.226775
Tmod1	-0.912371	4.13675	53.2296	1.77986e-07	7.56442e-06
Prkd2	-0.912056	3.12006	30.5135	1.20024e-05	0.000217181
Ddn	-0.911838	0.20942	7.0616	0.0139387	0.0533637
AK033101	0.911653	0.466647	7.91708	0.00974269	0.0411299
AK018959	-0.910657	-0.818021	1.96928	0.178091	0.339235
Odf2	-0.910077	0.362632	7.82677	0.0101119	0.0423526
Rictor	-0.909822	0.397787	7.15975	0.0133684	0.0518488
1300018I17Rik	-0.909529	0.371893	6.41512	0.0186805	0.0670932
AK044447	-0.908983	-0.960112	2.18702	0.153182	0.305723
Hist2h3c1	0.908954	-0.47642	4.03323	0.0562607	0.149796
Ube2l6	-0.908432	3.99344	38.323	5.11686e-06	0.000107827
Myef2	-0.908179	0.20902	6.88717	0.0150198	0.0567096
Tmem229b	-0.907313	-1.49971	1.19714	0.286391	0.466256
COX4AL	-0.907304	-0.224827	4.59055	0.0427444	0.122991
Slc5a6	-0.906977	-0.637259	3.15912	0.0884732	0.208797
AW112010	-0.906373	-0.00619905	5.37212	0.0295197	0.0933974
Cpsf7	-0.906148	1.00454	10.3462	0.0037609	0.0201919
Cd27	-0.905836	-0.0236237	5.73489	0.0249925	0.0827221
Aes	-0.905227	-1.50111	1.31952	0.262329	0.43895
Dnahc8	-0.905164	2.80239	29.4124	1.53934e-05	0.000267073
Cnksr1	-0.903967	-0.844652	2.7162	0.112665	0.247539
Tgif2	0.903558	4.21592	45.6574	9.18312e-07	2.74004e-05
Fam173b	0.903103	-1.11881	2.29766	0.14293	0.291185
Hist1h2ai	0.902898	-0.476167	3.98122	0.0577514	0.15268
Dhx57	-0.902645	-1.05321	2.22417	0.149192	0.30028
Cyb5	-0.902574	6.53516	135.394	3.16668e-11	5.61947e-09
Ap1g2	0.901943	0.374185	7.52454	0.011464	0.0464137
Galk2	-0.901331	-1.63881	1.14173	0.29619	0.476498
AK044644	-0.901318	-0.790317	3.19851	0.08663	0.205406
P2rx7	-0.90051	0.729959	9.90152	0.00444777	0.0227103
AK044410	-0.900366	0.929609	10.6429	0.00336762	0.0185835
Laptm5	-0.899769	-1.37526	1.34298	0.259804	0.43588
9330151L19Rik	-0.89931	1.96037	17.3845	0.000356721	0.00329219
Akt1	-0.898881	-0.637809	3.64521	0.0685367	0.172708
1700081L11Rik	-0.89882	0.0522979	5.52324	0.0275312	0.0887438
Il3ra	-0.898666	-0.791019	2.97027	0.0979655	0.224954
9430076C15Rik	-0.898386	2.61112	27.2121	2.57368e-05	0.000406762
Srsf7	0.898223	-1.68706	1.29884	0.265928	0.442922
Wdr48	0.898223	-1.68706	1.29884	0.265928	0.442922
2810454H06Rik	-0.898051	-1.18856	1.82616	0.189471	0.353664
Fbxo9	0.897039	2.0792	19.072	0.000216991	0.00222829
Fancc	-0.896881	0.347707	6.34358	0.0190804	0.0680769
AK050795	-0.896842	1.42039	14.8856	0.000777691	0.00589681
Rab40C	-0.896306	-1.37531	1.7429	0.19951	0.364926
Dnajb13	0.89626	3.39652	28.1957	3.69818e-05	0.000535918
Bclaf1	-0.895961	-0.375536	3.99258	0.0574218	0.152047
Clec3b	0.895782	-0.295884	4.41528	0.0465537	0.130477
Zfp207	-0.895623	3.04191	32.9128	7.1049e-06	0.000141748
mFLJ00277	-0.894499	-1.29829	1.76247	0.197093	0.361971
Col7a1	-0.894366	1.70986	17.2452	0.000372034	0.00339267
Dync2li1	-0.893875	-1.08644	1.94159	0.176688	0.337589
Hgfl	-0.89312	-0.205376	4.89658	0.036904	0.110603
Mpp1	-0.892805	5.94765	89.5257	4.84377e-09	3.74673e-07
Klhl2	0.891654	-1.37342	1.71114	0.203511	0.369837
S100a4	-0.890871	10.5669	157.209	6.93432e-12	1.67002e-09
1810048J11Rik	-0.890777	3.56371	41.4406	1.30851e-06	3.6971e-05
NAKAP95	-0.89015	-1.79021	1.01091	0.324945	0.506834
Cxcr6	0.89012	6.11327	94.2381	3.10598e-09	2.57516e-07
Crocc	0.889983	0.362925	7.70211	0.010647	0.0439759
Ccdc162	0.88974	2.64816	26.238	3.25579e-05	0.000490064
Zfp410	-0.889647	0.97701	10.3579	0.00374446	0.020125
Mrgprx1	0.888739	-0.685371	2.99455	0.0966812	0.223298
Acss1	-0.888046	8.03468	133.499	7.1992e-11	1.10333e-08
AK040865	0.887888	2.15971	19.2233	0.000207754	0.00214651
Elmo1	-0.887872	1.19427	11.7171	0.00227917	0.013518
Il18bp	-0.887235	0.248144	6.20341	0.0202486	0.0710916
Dennd1a	0.88702	-1.68573	1.04366	0.317456	0.499195
Atad5	-0.886971	-1.7899	0.994937	0.328717	0.510122
AK156477	-0.88666	0.811119	9.14755	0.00594892	0.0282636
Cd2bp2	-0.886113	-0.458204	3.94884	0.058702	0.154507
Ptgs2	-0.885965	-1.26107	1.71166	0.203445	0.369783
AK007907	-0.885607	2.29616	22.4629	8.50108e-05	0.00103476
Hmox1	-0.884975	7.85612	78.8519	1.4264e-06	3.97466e-05
Exog	0.884579	-1.18877	1.96411	0.174166	0.334414
AK042010	0.883785	-0.520657	3.56079	0.071596	0.178504
AK017500	-0.88273	0.262721	6.39117	0.0186359	0.0670351
Cd97	-0.88192	2.7219	22.9112	7.66953e-05	0.000953038
Slc48a1	-0.881846	3.09117	29.3725	1.55343e-05	0.000268597
Egr3	0.881807	-0.87237	2.75671	0.110157	0.243659
1810055G02Rik	-0.881653	0.540706	8.27396	0.00842252	0.0367056
Tubg2	-0.881427	-1.50136	1.41211	0.246599	0.42007
Slc23a3	-0.881412	-0.0558704	4.28514	0.0505405	0.1384
Lin9	-0.881335	-1.50045	1.46652	0.237955	0.409544
Tmem231	-0.880965	2.85941	22.469	9.94674e-05	0.00117537
Cd80	-0.880554	1.10523	8.7839	0.00741679	0.033402
Fancm	-0.879132	-0.0869276	5.28077	0.0307993	0.0966299
C8g	-0.878665	4.12092	42.8665	1.1537e-06	3.34373e-05
Rfx8	-0.878203	1.37831	13.7318	0.00113643	0.00788406
Sec14l2	0.877986	3.21356	33.4898	6.28514e-06	0.000127932
AK165329	-0.877728	-0.961425	1.30907	0.273042	0.450835
AK142198	-0.877233	0.711298	9.12525	0.00600106	0.0284446
Zfp672	-0.876752	-0.224215	4.63308	0.0418738	0.121119
Eea1	0.876396	6.55456	125.68	6.67212e-11	1.05451e-08
Psmc4	-0.876337	-0.738947	3.12225	0.0902397	0.211977
Rab27a	0.875845	0.977394	10.7822	0.00319881	0.017827
Ttll3	-0.875582	-0.335672	4.4106	0.0466605	0.130595
Mink1	-0.875409	-1.05227	2.20463	0.150911	0.30263
Apcdd1	-0.874806	3.26039	20.8122	0.000345872	0.00321257
AK155239	-0.874715	0.887947	9.48851	0.0052105	0.0256966
4931406H21Rik	-0.874101	-1.63795	1.22307	0.279972	0.458468
Ugcgl1	-0.873992	-1.37497	1.66869	0.209016	0.376326
AK162341	-0.873956	2.31189	22.1393	9.26589e-05	0.00111049
Papola	-0.873682	2.46434	24.1986	5.4134e-05	0.0007276
NHE8	-0.873553	-0.73814	3.01674	0.0955247	0.221613
AK031468	-0.873351	-1.37557	1.58404	0.220562	0.389629
Slc22a15	0.872874	3.85499	30.892	2.79182e-05	0.000433783
Rpf2	-0.872684	0.682068	8.64411	0.00725806	0.032804
Etohd2	0.872612	-1.1168	1.52054	0.233062	0.403945
mKIAA4006	0.871663	0.796978	9.2478	0.00572053	0.0273844
Tmsb4x	0.871544	6.90523	137.07	2.7976e-11	5.14504e-09
Acot11	0.871245	3.07231	31.6026	9.43242e-06	0.00017934
Pnpla3	0.870532	2.17457	20.9199	0.000128969	0.00144626
Tmpo	-0.869386	2.98222	25.9567	3.48766e-05	0.000515003
AK145095	-0.866756	2.37473	20.7479	0.000135235	0.00150154
Avpi1	0.866711	4.895	60.4729	6.49922e-08	3.36222e-06
Wdr67	0.866674	4.55849	59.9786	6.51502e-08	3.36222e-06
AK166773	-0.866368	-0.41558	3.84502	0.0618718	0.160676
Ick	0.865838	0.0405422	5.08037	0.0338293	0.103818
5730577I03Rik	-0.86542	-1.18772	1.50031	0.234306	0.40497
Rfc1	-0.865355	-0.416898	3.82428	0.0625283	0.161841
Rprd1a	-0.865094	5.18631	61.1851	1.44603e-07	6.33185e-06
Rreb1	-0.865062	1.63314	14.6518	0.000838948	0.00623865
Ddx17	-0.862222	3.50394	33.4464	6.3431e-06	0.000128321
Sohlh1	0.860923	-1.59121	1.07436	0.310852	0.492439
Tagln3	-0.859792	-1.18839	1.93967	0.176765	0.337673
Smarca4	-0.858424	-1.63815	1.24081	0.276599	0.454853
Rad51ap1	-0.858177	-0.592892	2.57514	0.123325	0.264512
Skp2	-0.856739	1.19333	9.88473	0.00447647	0.0228338
Fam73a	-0.856419	1.72842	14.6811	0.000830995	0.00618507
1500011B03Rik	-0.856409	0.863334	8.91295	0.00652348	0.0303519
Pou2f2	-0.856395	-0.415761	3.89906	0.0601982	0.157666
AK052878	0.856249	-0.960278	2.36523	0.137446	0.284925
2018-03-07	-0.856183	0.810872	8.83425	0.00672969	0.0310259
Gm5918	-0.855804	1.22253	11.9907	0.00206804	0.0125259
Fgf11	-0.855169	-1.08598	1.98502	0.17198	0.331577
Shyc	-0.854717	-1.5006	1.01637	0.325753	0.507601
Nsdhl	0.854574	5.47687	87.9553	2.10201e-09	1.83292e-07
Efnb3	-0.854273	2.02097	16.9976	0.000401057	0.00360916
Snhg9	-0.853883	0.718175	7.28694	0.0126674	0.049895
Kctd3	-0.853542	-1.5007	1.40497	0.247762	0.421326
Mfn2	0.852808	-0.499495	3.40554	0.0776387	0.189278
Pik3ip1	-0.852521	-0.297715	4.10721	0.0542149	0.145537
Pcdhb1	-0.851879	-1.41603	1.524	0.22924	0.399236
Pcsk7	-0.850471	-0.818092	2.60122	0.120155	0.259362
Endod1	0.850176	-0.41551	3.22961	0.0855835	0.203497
Set	0.849924	3.52169	22.8396	0.000217874	0.00223509
Caper	-0.849542	1.02996	9.98058	0.00431623	0.0222521
Bnip2	-0.8495	-0.662517	3.00447	0.0961621	0.222479
Rpia	0.849263	7.19534	141.556	2.0205e-11	4.17089e-09
Tmem138	-0.849023	-1.08619	2.12621	0.158057	0.313235
Dusp19	0.848866	-1.45747	1.42441	0.244609	0.417802
Snord42a	-0.847961	-0.902236	2.183	0.152843	0.305234
Dnajc22	0.847835	0.973203	9.99649	0.00429027	0.0221409
Ptger2	0.847327	2.8369	24.6998	4.76742e-05	0.000656982
Sbno2	-0.846841	-0.054599	4.46915	0.0453436	0.128164
Pcdhb16	-0.845809	1.14846	6.13118	0.0263782	0.0861808
mt-Nd4	-0.845436	9.43017	143.881	1.71289e-11	3.85019e-09
Trdmt1	0.844609	4.46266	57.9019	8.79551e-08	4.25677e-06
Zfp948	-0.844551	0.168853	5.57175	0.0269248	0.0874203
Scarna2	0.844502	-1.45651	1.33102	0.260243	0.436399
4933407H18Rik	-0.844217	-1.4165	1.2916	0.267262	0.444266
Snrnp70	-0.843611	3.94951	28.8532	4.51789e-05	0.000628589
Eps8R1	0.843467	-0.499572	3.57351	0.0711252	0.177518
AK170837	-0.843297	1.18883	11.3653	0.00258592	0.0150239
Mx2	-0.843276	0.553178	7.56455	0.011274	0.0457796
Slc25a40	-0.843259	-0.479493	3.64078	0.0686935	0.172901
AK054076	-0.842095	-0.479509	3.50732	0.0736141	0.182011
BC040816	0.841773	-1.05346	1.95368	0.175269	0.335767
LOC100302626	-0.840993	-0.688771	2.80174	0.107446	0.239493
Fat1	-0.840987	-1.54622	1.13465	0.297628	0.47839
Timp2	-0.840183	0.39403	3.42475	0.0866083	0.205403
Ribc1	0.839234	1.39254	12.4376	0.00176781	0.0111807
AK082325	-0.838345	-0.296395	4.17764	0.052345	0.141987
2700007P21Rik	-0.83759	1.7998	15.469	0.000645102	0.0051058
mTOP3beta	-0.836264	-0.590834	3.12863	0.0899312	0.2114
Prex2	-0.836259	-0.479004	2.97977	0.0975912	0.224511
Pram1	0.836129	-1.45787	1.44973	0.24058	0.413012
Jrk	0.835997	4.57987	58.9364	7.56679e-08	3.77035e-06
Terf1	-0.835985	-0.68749	2.98068	0.0974125	0.224295
Fam69c	-0.835961	0.168472	5.60021	0.0265761	0.0866592
AK158854	-0.835835	-1.08599	2.00853	0.169562	0.329007
Rps27a	-0.835401	-0.990802	2.10407	0.160149	0.316017
Unc13a	0.835021	4.25266	48.1239	4.05083e-07	1.43769e-05
Espl1	-0.834936	-1.18706	1.75513	0.197994	0.362942
mFLJ00088	0.834872	-1.2591	1.32212	0.263687	0.440462
Cbfa2t2	-0.83369	0.285622	5.50639	0.0277454	0.0892067
Wdr85	-0.833009	0.398196	6.67007	0.016497	0.0611311
Zfp398	-0.83282	0.573552	7.57741	0.0112137	0.0456622
Ilvbl	-0.831156	1.81948	14.9779	0.000754869	0.00576699
BC098222	0.830342	1.28439	11.5716	0.00240088	0.0140619
Id3	0.83028	4.31355	45.4236	6.41433e-07	2.07952e-05
Tmem129	-0.829968	0.312689	5.90131	0.0231788	0.0782818
AK163440	-0.829918	10.5448	139.053	2.41995e-11	4.61846e-09
Pik3c2a	-0.829711	-0.396786	3.05953	0.0937932	0.218649
0610011L14Rik	-0.829597	0.0971267	5.29399	0.0306103	0.0961563
Prosc	-0.829114	2.169	17.8688	0.000308588	0.0029399
mKIAA0651	-0.82892	0.431436	6.2941	0.0194512	0.0690346
AA415398	-0.828689	1.73143	14.65	0.000839427	0.00623865
AK080222	0.828613	-0.762623	2.69425	0.114052	0.249705
Tmem11	-0.828501	0.756003	7.27553	0.0127286	0.0500971
Gm14005	-0.827917	2.4343	21.3628	0.000114247	0.00131322
Vrk3	-0.827223	-1.18737	1.87899	0.183423	0.345885
Lamb3	-0.824946	0.740455	7.28925	0.012655	0.0498853
Snhg1	-0.824695	2.55363	18.945	0.000225096	0.00228599
Camk2b	0.824614	0.655593	7.66059	0.0108321	0.0445539
Cdk16	0.824204	1.73357	11.3786	0.00284873	0.0161973
Dhrs4	-0.823522	-0.224288	4.30505	0.049145	0.135709
AK053376	-0.823033	0.372523	6.66278	0.0165493	0.0612498
4933400C05Rik	0.822794	-0.187186	4.27862	0.0497902	0.136967
AK085371	0.822719	0.785814	7.32613	0.0124596	0.0494595
Hdac5	0.822594	3.05386	28.6328	1.84198e-05	0.000307453
Rrad	0.822299	0.170864	5.17721	0.0323254	0.100083
Kif15	0.822252	5.89157	94.0633	1.117e-09	1.13354e-07
BC023202	-0.822223	4.56245	53.4331	1.72448e-07	7.35998e-06
Ppp6r3	-0.821878	-0.763201	2.49878	0.127325	0.270737
AK139109	-0.821007	-1.41615	1.35954	0.255336	0.430311
Bmpr2	-0.820913	6.65135	93.488	3.21408e-09	2.64312e-07
mKIAA0453	-0.820154	-1.41614	1.41414	0.246269	0.419716
Mnd1	0.819981	4.16474	39.112	2.11982e-06	5.49793e-05
AK016841	-0.819889	0.441751	5.43198	0.0290923	0.0924766
Mapk9	-0.819253	0.418458	6.13871	0.0208397	0.0726625
BC100491	0.819091	-1.25865	1.66295	0.209776	0.377157
AK140725	-0.818904	2.22616	18.8319	0.000232586	0.00233626
Xaf1	0.818845	-0.788574	2.4463	0.131193	0.276136
Strbp	-0.818449	-1.54586	1.24569	0.275679	0.454004
Scel	-0.818298	0.207861	5.78777	0.0243995	0.0812381
AK039495	-0.816753	1.11068	8.74141	0.0069822	0.0318561
Btf3	-0.815835	0.00938058	5.01529	0.0348841	0.106235
Lin37	-0.815816	0.0697679	5.18607	0.0321915	0.0998826
Btnl7	0.815616	-0.457215	3.34774	0.0800359	0.19349
Ddx49	-0.81557	-0.0860373	3.40875	0.0797714	0.192971
Gdf9	-0.81489	-1.18826	1.70272	0.204589	0.370796
Atp13a2	-0.814318	1.56422	11.9376	0.00210728	0.0127103
Tnip3	0.814117	-0.152807	4.27138	0.0499686	0.137234
Unc13d	0.813882	-0.354141	3.49174	0.0742144	0.183048
Acss2	0.813409	3.04766	27.8944	2.18905e-05	0.000354844
Rmrp	0.813403	2.12801	15.6809	0.000603228	0.00483154
1110057K04Rik	-0.813185	-1.08694	1.75068	0.198544	0.363625
Zfp263	-0.813152	1.29054	10.5455	0.00349154	0.0191005
Ssr2	-0.81309	-0.991163	1.58928	0.220973	0.389936
S1pr2	-0.812855	7.95861	144.432	1.64772e-11	3.78788e-09
Ubn1	-0.812773	-0.739217	2.31448	0.141541	0.289714
AK015096	-0.810999	-1.54572	1.23193	0.27828	0.456726
Clk4	-0.810805	1.65105	11.7469	0.00225507	0.0134414
Parvb	-0.809897	1.56503	12.7768	0.00157174	0.0102768
Jnk2	-0.809781	0.739536	6.0879	0.0222149	0.0761449
Pcbp2	0.80939	-0.845033	2.27732	0.144631	0.293587
Gdpd3	-0.809032	-1.22438	1.56559	0.223183	0.392199
Myh13	-0.808992	-1.08533	1.95928	0.174677	0.335012
AK015956	0.808845	-0.0202318	5.04155	0.0344541	0.105224
Otos	-0.808604	-0.52195	3.06035	0.0932979	0.217846
Map3k7	-0.808422	1.33546	11.0197	0.00293177	0.0166134
Gpcpd1	0.808066	1.14856	9.66111	0.00487558	0.024402
Rab11fip4	-0.807999	7.34872	37.6477	0.000470486	0.00405095
BC099422	-0.80708	0.871156	8.66158	0.00720766	0.0326199
Nucb2	0.806944	-1.2597	1.66365	0.209683	0.377123
AK018977	-0.806943	2.60089	22.1649	9.20268e-05	0.00110815
Napsa	-0.806897	6.37962	80.104	2.3391e-08	1.46957e-06
Rabep2	-0.806883	-1.22414	1.64606	0.212027	0.379921
Mrpl4	-0.806525	1.23917	7.06709	0.0159516	0.0595205
Fgfr1op	-0.806502	0.324229	6.07429	0.0214474	0.074198
Tjp3	0.806492	3.1978	28.3259	1.97839e-05	0.000326984
Rnf14	0.806456	0.299499	5.69281	0.0254756	0.083964
BC058988	0.80581	2.90422	22.7734	7.83124e-05	0.000968374
Brpf3	-0.805423	-0.686646	2.76662	0.109554	0.242648
Cdca2	-0.804935	-0.900874	1.93291	0.177493	0.338578
Gtf2h2	-0.804908	1.84549	14.334	0.000930806	0.00675887
Dync1h1	-0.804839	9.8843	140.743	2.14178e-11	4.24787e-09
Snord72	0.804573	-0.45685	3.51728	0.0732334	0.181319
Rab43	-0.804493	-1.54621	1.081	0.309072	0.490702
Mrgpra9	-0.804354	2.68699	20.3359	0.000151629	0.00165478
mKIAA0031	-0.804333	-0.356007	3.59571	0.070312	0.176041
9930032O22Rik	0.80422	1.91508	0.781831	0.455328	0.629445
Ano4	-0.80378	-1.41586	1.40842	0.247198	0.420945
Crry	0.803681	-1.25875	1.58129	0.22095	0.389936
Zfp36l3	-0.803182	0.0543604	4.49301	0.0448191	0.127358
Grhpr	0.80284	6.20496	99.96	6.25661e-10	7.27421e-08
Car3	-0.80262	0.336322	5.8712	0.0234958	0.0790678
Psph	0.802198	7.47181	130.139	4.71134e-11	7.94253e-09
Thbs2	-0.802054	3.8563	4.73007	0.0996786	0.227801
Celf1	0.801944	1.0038	9.06274	0.00614995	0.0289679
Ifrd1	0.801761	7.32908	111.696	2.13618e-10	2.82331e-08
Apln	-0.801205	3.20918	24.9323	4.49674e-05	0.00062824
4933421O10Rik	-0.800533	1.6098	12.3141	0.00184569	0.0115242
Frmd4a	-0.80024	0.0248334	4.96211	0.0357732	0.108226
Jak3	0.800123	-0.376102	3.06428	0.0931373	0.217571
Gmeb2	-0.799134	-0.764261	2.40624	0.13424	0.28014
Cadps2	0.798723	-1.08494	1.9026	0.180797	0.342722
Sh3bp5	-0.79844	-1.05535	1.71198	0.203404	0.369776
1700007K13Rik	0.798425	-1.49995	1.00622	0.326621	0.508351
Cnot8	-0.798311	1.16655	10.021	0.00425066	0.0219938
Anxa9	0.797793	-0.0993754	4.39399	0.047042	0.131372
Xylt1	-0.79768	3.86371	38.7622	2.16881e-06	5.58681e-05
KIAA1440	-0.79723	-0.61493	2.83647	0.105408	0.236776
AK020087	-0.797169	-1.29744	1.52679	0.228827	0.398929
Bcl2	0.796384	6.7029	38.3636	0.000243809	0.0024154
4932435O22Rik	0.796333	-0.522238	3.0508	0.0937806	0.218649
Prrt1	0.796323	1.2633	10.8225	0.0031517	0.017613
Hpcal1	-0.795123	-0.137286	4.20352	0.0516764	0.14074
Abcd2	-0.795029	-0.279655	3.43909	0.0762846	0.186787
Fam118a	0.794835	-0.873196	1.86373	0.185541	0.34858
AK168184	-0.794385	2.85661	21.2476	0.000117891	0.00134599
9630014M24Rik	0.794277	-1.37419	1.42731	0.244144	0.417149
Aoc3	-0.793943	0.182274	5.37926	0.0294222	0.0931765
1600002H07Rik	-0.793468	-1.54482	1.07194	0.311064	0.492551
Cuedc2	-0.792941	-1.5452	1.19141	0.28613	0.465981
Mrpl52	0.792847	-0.712803	2.5316	0.124975	0.267007
Prepl	0.792782	-0.0541371	4.23802	0.0508001	0.138914
ramp	-0.792782	0.818354	7.50047	0.01158	0.0467776
Tab1	-0.792675	7.50973	52.1142	3.26858e-05	0.000490529
AK028622	-0.792621	-1.54505	1.20089	0.284268	0.46362
Gm6525	0.792465	0.980358	6.82113	0.0161734	0.060167
Tmem183a	-0.792378	0.529755	6.56604	0.0172613	0.0632998
Smad5	0.792034	-1.08462	1.82324	0.189812	0.353914
Cnga1	-0.791836	1.21707	9.66356	0.00487099	0.0243911
Gnmt	-0.791804	-1.29668	1.45178	0.240258	0.412599
Lta	0.791685	-0.661802	2.75182	0.110457	0.243945
Mc1r	-0.791665	-1.02169	1.92331	0.17853	0.33989
AK085969	0.791636	-0.354256	3.64335	0.0686024	0.17283
2400003C14Rik	-0.791241	2.41611	16.873	0.000416586	0.0037093
Nfkbie	-0.791171	5.98003	81.2882	4.36838e-09	3.47922e-07
Fam173a	-0.79084	2.17446	14.4599	0.000893868	0.0065613
Rcbtb2	-0.790738	-0.844694	2.36403	0.137542	0.285031
Myo9b	-0.78973	-0.188797	3.96993	0.0580807	0.153231
AK171687	-0.789135	-1.68714	0.941899	0.341691	0.520543
Snora78	-0.789045	-0.316375	3.67302	0.0675617	0.170804
Nol11	-0.78872	0.338574	5.78421	0.0244389	0.0813425
Tnn	-0.788265	3.8434	7.49291	0.0378313	0.112581
Atp6v0d2	-0.788047	4.96961	41.8197	4.38864e-06	9.65024e-05
Pitpnc1	-0.787618	-0.818618	1.83267	0.189815	0.353914
Ifnz	-0.786642	-1.54476	1.10773	0.303298	0.48473
Tmem38a	-0.786504	3.51565	31.4677	9.71545e-06	0.000184375
Kctd18	-0.786418	0.552599	6.44573	0.0181944	0.0659156
Ush2a	-0.786211	1.16128	9.46964	0.00524863	0.0257968
G530011O06Rik	0.785939	-1.37534	1.39785	0.248929	0.422388
Kiaa0892	-0.784964	0.311591	5.79782	0.0242887	0.0809224
Tubb2a	-0.784559	4.1855	42.7799	1.02454e-06	3.00383e-05
Gm550	-0.784472	0.0981345	4.71682	0.0402172	0.117776
Tbl1xr1	0.784349	-1.18695	1.60015	0.218304	0.38719
Aurka	-0.783798	-0.961002	1.89777	0.18133	0.343089
Nos2	0.782387	-0.592088	2.66259	0.116087	0.25252
Atf4	0.781754	10.0926	114.338	1.69914e-10	2.35436e-08
Cpb1	-0.781378	3.41929	5.22611	0.0738507	0.182436
Farsa	-0.781277	1.12503	7.34625	0.0127063	0.0500289
Snapc4	-0.78077	-1.41592	1.18849	0.286707	0.466641
Oxnad1	-0.780166	0.384147	4.99225	0.0352661	0.10709
Arhgdia	-0.780024	0.181238	4.01692	0.0577663	0.15268
Tmem189	0.779954	0.200166	5.03625	0.0345404	0.105424
AK016061	-0.779478	-1.29712	1.24571	0.275676	0.454004
Tnfsf10	-0.77859	1.78678	12.5606	0.00169379	0.0108641
Nefh	0.77846	9.04062	52.7549	3.03684e-05	0.000466125
Cd177	-0.778345	0.739044	6.9115	0.0148636	0.0562249
Fam46b	-0.777926	0.712973	6.28198	0.0195557	0.0693082
AB341556	-0.77768	7.18443	30.3298	0.00127062	0.0086084
Trim46	0.777516	-0.959236	1.89676	0.181442	0.343141
Wnt10a	0.777476	1.18418	9.08132	0.00610527	0.028817
Itsn1	-0.777056	2.2674	17.6038	0.000333978	0.00312217
1700019L03Rik	-0.775807	-1.11914	1.70676	0.204071	0.370123
Lims2	-0.775742	-0.417544	3.18389	0.0873087	0.206628
Gm12250	-0.775518	0.63527	5.91926	0.0229922	0.0778593
AK138781	-0.775352	0.220805	5.30391	0.0304694	0.0958573
Casp1	-0.775099	7.54374	96.8739	1.94218e-09	1.70827e-07
AK007006	-0.774915	-0.791127	2.26819	0.145403	0.294562
DQ717888	-0.774898	-0.500252	2.89357	0.102154	0.231575
2310057M21Rik	0.774311	0.351194	5.14216	0.0328609	0.1014
AK029258	-0.774003	-0.480318	2.82923	0.105829	0.237357
Gp5	-0.772406	-1.45857	1.11458	0.301841	0.482859
Il12rb1	0.772374	-0.0362728	4.52828	0.044056	0.125706
Igtp	-0.771943	0.430627	5.76111	0.0246964	0.0819569
Trim30d	-0.771719	-0.242833	3.56542	0.071424	0.178164
Fyco1	0.771595	-0.590178	2.79586	0.107795	0.239977
Rpp38	0.771029	3.57423	29.8503	1.39341e-05	0.000244269
Nek2	-0.770958	-0.930128	2.00464	0.16996	0.329654
GRC	-0.77088	-0.930384	2.04031	0.166359	0.324786
Rab3a	-0.770626	-1.54529	1.11996	0.300703	0.48142
Bpag1	-0.770394	-1.54459	0.930473	0.344607	0.523772
Rps21	-0.769929	-1.41624	1.15992	0.292433	0.472518
AK080422	0.769573	-0.414022	2.98192	0.097347	0.224295
Tpm3	-0.769279	0.741651	6.8912	0.0149938	0.0566326
DQ543801	0.769252	-1.37498	1.281	0.269151	0.446379
LOC100134990	-0.769061	-1.33604	1.10116	0.305265	0.486506
AK085995	0.76892	0.923762	7.88244	0.00988251	0.0415987
Mtmr11	-0.768459	-0.738989	2.30223	0.14255	0.290763
AK150172	0.768109	-1.26016	1.36147	0.255008	0.429901
Gm10505	0.767997	2.40455	16.2914	0.000498282	0.00421764
Fuca2	-0.767294	4.64237	47.1223	4.79361e-07	1.64364e-05
Mlx	0.767122	0.444505	6.13166	0.0209053	0.0727907
Iqcg	0.766622	4.03656	34.8578	4.7236e-06	0.000101658
Gpr21	-0.766501	-0.737751	2.19426	0.151834	0.30406
Peg13	0.766423	-1.41519	1.00386	0.327176	0.508886
Med20	-0.766271	2.18565	15.6885	0.000601775	0.00482708
AK048429	-0.765864	0.360389	4.9011	0.0368246	0.11043
Fdxr	0.765814	6.52355	98.7489	7.03118e-10	7.94387e-08
AK020764	-0.76547	2.62824	19.83	0.000174781	0.00186291
AK039020	-0.764612	-1.68722	0.776986	0.387063	0.567166
Rnf128	-0.764291	5.03806	58.6826	7.84988e-08	3.89223e-06
Zmynd19	0.763687	-0.789807	2.1833	0.152816	0.305234
Ece2	-0.763327	-1.11908	1.71483	0.203041	0.369424
AK138089	-0.763132	-0.930447	1.89533	0.181601	0.343281
AK047030	-0.763013	0.793729	7.2183	0.0130405	0.0510074
mKIAA0895	-0.762017	0.220699	3.80341	0.0647666	0.165943
Gm11968	0.760944	-0.00617462	4.36233	0.0477786	0.132994
Mboat1	0.760333	0.0831798	4.71169	0.0403166	0.11793
Ddx24	-0.760322	-0.790804	2.27004	0.145245	0.29442
H2-K1	-0.759783	1.77756	13.0209	0.00144538	0.0095618
AK153427	-0.759595	-0.523598	2.88309	0.102742	0.232492
Eif2ak3	-0.759527	7.03127	102.438	4.94525e-10	6.02665e-08
Wdr93	-0.759456	-0.457596	3.00151	0.0963167	0.222786
A430110N23Rik	-0.759241	1.03043	6.75715	0.0160829	0.0599184
Snord68	-0.758967	0.112788	4.47017	0.0453211	0.128164
Raf1	-0.757347	0.13866	4.18508	0.0521518	0.141615
TCR-beta chain	-0.756594	-0.663719	2.30682	0.142171	0.290287
Adam1a	-0.756588	0.829061	6.87641	0.0150894	0.0568453
Ccdc112	-0.756129	2.34209	17.1658	0.000381083	0.00345709
Nasp	0.75611	2.92213	20.8778	0.000130476	0.0014567
Rnmt	-0.756015	-0.930762	1.68534	0.206835	0.373596
Nadsyn1	0.755859	-0.372637	3.14259	0.0892602	0.210085
Mir191	0.755791	-0.66135	2.52544	0.125412	0.267737
Eif2b3	0.75574	3.58363	29.1652	1.62899e-05	0.000276463
Galnt1	0.755551	-0.478636	2.99631	0.0965889	0.223211
Cpxm1	-0.755537	0.0394435	4.4802	0.0450998	0.127819
Irgq	-0.755446	1.66735	10.8168	0.00315826	0.0176399
Alkbh2	-0.755285	-1.5905	0.879355	0.357934	0.536768
Sh3rf1	-0.755165	6.46355	99.1625	6.75559e-10	7.7651e-08
Map1s	-0.755149	0.518899	5.32167	0.0302188	0.0952817
Naa40	-0.754616	-1.11979	1.5927	0.219344	0.388559
Map2k2	-0.75452	-1.11884	1.57799	0.221418	0.390385
LOC100503704	-0.753054	1.12578	8.05418	0.00921031	0.039309
Ahcyl2	0.752673	-1.18743	1.41216	0.246591	0.42007
Magee1	-0.752365	0.521544	5.68071	0.0256165	0.0843186
Mir1949	-0.752123	-0.335951	3.30873	0.0817022	0.196317
Ugp2	-0.751801	2.6733	16.8634	0.000417804	0.00371687
Tmem19	-0.75166	-1.33595	1.26421	0.27223	0.449935
DQ556157	0.751248	-0.791097	2.21623	0.149887	0.30125
Timm9	-0.750142	1.40951	9.70391	0.00479622	0.0240883
AK076859	-0.750086	-1.84513	0.379847	0.548353	0.703971
AK178359	-0.749845	-1.22337	1.39123	0.250022	0.423684
Mettl3	0.74916	5.12674	60.4027	6.13346e-08	3.21451e-06
Dnajb4	-0.748923	-0.101699	3.98288	0.057703	0.15263
AK012841	-0.74881	-0.457266	2.58602	0.121188	0.260869
Crbn	-0.748805	0.662862	5.84654	0.023759	0.0797618
Btg2	-0.748136	7.31761	107.601	3.0737e-10	3.88631e-08
AK050866	-0.747774	-1.11913	1.59116	0.21956	0.388804
Gzmb	0.74773	3.94864	18.025	0.000960366	0.00689984
Elf1	-0.747686	1.2441	9.39559	0.00540123	0.0263421
AK076555	-0.747491	-1.02114	1.76961	0.196219	0.361062
Zfp329	-0.747235	2.85458	18.7126	0.000240786	0.00240667
AK007605	-0.746562	-0.415906	2.8266	0.105982	0.237591
Tuba8	0.746364	7.79379	113.987	1.75119e-10	2.39369e-08
Kif5a	-0.746046	1.03919	8.31937	0.00826918	0.0361933
AK030886	0.745939	-0.186523	3.78322	0.0638509	0.164381
Rsrc2	-0.745645	2.49988	17.4907	0.000345499	0.00321206
Nlgn2	-0.74537	0.94429	4.67357	0.0461776	0.129746
N4bp2l1	-0.745268	1.7527	12.1548	0.00195175	0.0120085
Hes1	-0.744745	0.799882	2.61354	0.138818	0.286501
Rnf13	-0.744557	-1.05306	1.67542	0.208132	0.375134
Ap2b1	-0.744397	-0.4586	2.62106	0.118822	0.257142
Snord69	-0.744128	-1.22364	1.32949	0.26051	0.436558
Phospho2	-0.743757	-0.546001	2.40046	0.134686	0.280897
Dcun1d2	-0.743622	0.00914723	4.04634	0.0558917	0.149089
Dtnbp1	-0.743501	2.66701	19.1165	0.000214227	0.00220439
AK007174	-0.743471	-1.68675	0.852785	0.365168	0.543676
Ap3m2	-0.74293	-1.15396	1.41536	0.24607	0.419518
Elovl6	-0.742357	-1.05251	1.47457	0.236709	0.408029
C030044B11Rik	0.742213	-0.712009	2.31264	0.141692	0.289714
Tmem132b	-0.742184	-1.45765	0.967817	0.33527	0.515619
Herc4	-0.74033	-1.45835	0.941375	0.34192	0.520599
Ccl22	-0.739811	-1.11905	1.50183	0.232553	0.403616
H2-K2	0.739573	1.19525	7.73769	0.0104912	0.0435088
2510009E07Rik	0.739276	7.12097	22.3633	0.00428558	0.0221279
Gm6724	0.739051	-0.545497	2.60632	0.119811	0.258784
AK015855	0.738933	3.30234	23.1254	7.14063e-05	0.000899471
BC029214	0.738816	3.53693	24.5466	4.97426e-05	0.00067901
AK015581	-0.738357	1.55913	9.91868	0.00441886	0.0226427
Gm4535	0.738269	-1.49998	1.00731	0.325788	0.507601
AK013593	-0.738061	2.54014	16.5182	0.000464518	0.00401851
APG16L	-0.73795	1.6567	11.0319	0.00291882	0.0165493
Pxmp4	0.737806	2.91043	21.0149	0.000125649	0.00141058
Lix1	-0.737421	2.33684	9.04462	0.00917486	0.0392073
Defb41	0.737208	-1.50016	1.08753	0.307647	0.488933
Slc4a8	-0.736882	5.55376	66.1126	2.80154e-08	1.66692e-06
Snord52	-0.736483	1.20076	8.82478	0.00675497	0.0311283
Rgn	-0.73644	-0.478027	2.24447	0.148132	0.298856
AK171159	-0.736345	2.97617	21.0842	0.00012328	0.00139172
Sec20	-0.735341	0.419631	5.50707	0.0277366	0.0892067
Spcs1	-0.735202	-1.22259	1.41209	0.246602	0.42007
Gars	0.734519	10.2815	105.275	3.79905e-10	4.74412e-08
Adam6b	0.7345	-0.614189	2.29036	0.143538	0.291945
Abhd14b	-0.734493	4.78409	49.7075	3.11922e-07	1.16855e-05
2010111I01Rik	-0.734264	0.983498	6.30411	0.0194441	0.0690337
2010016I18Rik	0.733751	0.0999083	3.79324	0.0635253	0.163793
Rnf11	0.733465	-0.613008	2.46286	0.129958	0.274546
Ccr10	0.733446	0.488678	5.41478	0.0289426	0.092148
A230020J21Rik	0.733417	-1.05356	1.50987	0.231344	0.402094
Krt7	0.73312	-1.11851	1.30659	0.264659	0.441535
Nhlrc4	-0.732429	-0.903083	1.85286	0.186384	0.349773
Znrf3	-0.732377	4.61471	36.2395	4.8585e-06	0.000103461
Spata13	-0.732351	0.683706	6.43409	0.0182876	0.06608
Rasa3	0.731885	3.97078	33.4036	6.40081e-06	0.00012912
AK141540	-0.731259	-1.84495	0.573242	0.456739	0.630545
Mina	0.730853	0.399129	5.3918	0.0292519	0.0927823
AK043847	-0.730631	2.34034	13.5737	0.0011983	0.00822869
Sfrs14	-0.730421	2.9324	20.2511	0.000155264	0.00168508
Spns1	-0.730328	1.11773	8.25186	0.00849829	0.0369605
Zfp773	-0.730062	0.0983312	4.41802	0.0464912	0.130446
AK019730	-0.729801	-1.68658	0.725183	0.403059	0.58242
3830408C21Rik	-0.72949	-1.05406	1.4056	0.247659	0.421326
Xylb	0.729469	-1.63762	0.910128	0.349809	0.529167
Ufsp1	0.728955	0.715562	6.45113	0.0181514	0.0658305
Gpr137	-0.728658	3.36609	24.2941	5.28328e-05	0.0007154
Tmem100	-0.72825	-0.189614	2.98967	0.0969376	0.223609
Atg9b	0.72801	6.77105	94.0606	1.1173e-09	1.13354e-07
Snhg6	-0.727447	7.16552	10.3592	0.0452472	0.128057
Mfsd6	-0.727405	4.14615	31.7217	9.18989e-06	0.00017572
Dtx4	-0.725512	6.20473	44.0524	1.57715e-05	0.000269931
AK080857	-0.725487	1.37263	9.41018	0.00537078	0.0262315
AK144695	0.725276	-0.29692	1.18554	0.304617	0.485857
Tm9sf4	-0.725065	-1.22345	1.17185	0.290023	0.469709
AK042300	-0.724959	-1.26042	1.14843	0.29478	0.47502
Plekhn1	0.723044	-1.29751	1.30224	0.265321	0.44242
Slc39a14	-0.722956	0.93788	7.23289	0.0129602	0.050752
AK133643	-0.722887	-0.737894	2.1873	0.152457	0.304763
Zfp276	-0.722688	0.827158	6.4772	0.0179451	0.0653164
Slc30a9	0.722498	-0.959728	1.61071	0.21684	0.385491
Cpeb4	-0.721176	3.90552	29.1496	1.63485e-05	0.000276993
Pou6f1	-0.720741	0.938101	7.30422	0.0125753	0.0497315
Ppp1r14c	-0.720505	4.64297	45.933	5.87332e-07	1.92261e-05
Rnf20	-0.720358	0.248624	4.6462	0.0416094	0.120492
Rrbp1	0.719869	7.87335	95.8741	9.32008e-10	9.92343e-08
Ctdsp2	-0.71981	-1.05294	1.4969	0.233298	0.404089
AB349695	0.719698	5.79305	67.667	2.28338e-08	1.44352e-06
Slc38a10	-0.719525	-0.545588	2.56349	0.122739	0.263478
Ston2	-0.719007	6.89119	88.764	1.92938e-09	1.70827e-07
A530098C11Rik	-0.71876	-1.15325	1.40476	0.247797	0.421326
Pbx4	-0.718556	-0.846038	1.55987	0.224382	0.393982
Prrg1	0.718484	1.16985	8.28341	0.00839036	0.0366128
Ptprc	-0.718195	0.210029	4.47126	0.0452969	0.128162
Timd2	-0.718062	1.86619	11.2495	0.00269661	0.0154891
B330016D10Rik	-0.718024	0.372685	5.02447	0.0347331	0.105885
Snord42b	-0.717984	0.322395	4.35964	0.0478419	0.133055
Idua	0.71788	0.533493	5.00713	0.0350189	0.106595
Pak6	-0.717859	0.221825	4.05911	0.0555352	0.148333
Adrbk1	0.717834	-0.43674	2.82446	0.106108	0.237711
AK019889	-0.717475	-1.5915	0.921066	0.346983	0.526119
4632434I11Rik	0.716919	-0.152248	3.51463	0.0733342	0.181452
A930005H10Rik	-0.716811	0.794398	4.66552	0.0434447	0.124418
1700113I22Rik	0.716767	-1.63773	0.874922	0.359126	0.537885
Zmynd8	-0.716655	-1.33551	1.22401	0.279792	0.458315
Msi2	-0.716553	-1.33509	1.19344	0.285729	0.465402
Gm608	0.716428	0.156618	4.33336	0.0484643	0.13438
Tet2	-0.716209	-0.737989	1.9326	0.177525	0.338578
Nfe2	0.715819	0.0542631	4.12113	0.0538393	0.144836
mSSH-2L	0.715608	-0.240387	2.78724	0.108348	0.240919
Fbxl6	-0.71496	-0.902271	1.79383	0.193294	0.357761
Ppp1r15a	0.714789	-0.960329	1.51922	0.229949	0.400264
Naaladl1	-0.714781	0.210259	4.50348	0.044591	0.126946
Spata24	0.714557	0.196592	4.54531	0.0436929	0.124916
Ptms	-0.713394	7.27552	101.503	5.40124e-10	6.37449e-08
Clk3	0.71304	2.20204	14.0253	0.00103063	0.00731051
Chrnb1	0.712884	0.553563	5.04209	0.0344453	0.105224
Hoxc9	-0.712794	4.65168	42.9398	9.95388e-07	2.92685e-05
AK079263	-0.712666	0.853129	5.7455	0.0248722	0.0823779
4732416N19Rik	-0.71181	-1.59138	0.898623	0.352815	0.532067
Sema6b	-0.711205	-1.33592	0.957441	0.338122	0.518097
Fbxw9	-0.710153	1.37665	8.58418	0.00743393	0.0334494
4930550C14Rik	0.709961	6.60784	5.57988	0.113878	0.249431
Zfp655	0.709789	-0.0214612	3.72361	0.0658287	0.167832
Fyn	-0.709541	0.313325	4.48842	0.0449195	0.127486
Col22a1	-0.708921	4.8493	1.62351	0.317122	0.499096
Tnrc6b	-0.708435	0.207508	3.90552	0.0600017	0.157233
Tekt5	-0.708149	-0.375521	2.55355	0.123431	0.264682
Zfp217	-0.708009	1.03121	6.50114	0.0177579	0.0647283
Lactb2	0.707895	6.85951	93.1185	1.22905e-09	1.18398e-07
Extl1	0.707807	0.704778	5.15073	0.0327351	0.101104
Rcbtb1	-0.707735	-0.61534	2.31374	0.141602	0.289714
4933411K20Rik	0.707498	-1.41513	1.12172	0.300333	0.481056
Nr4a3	0.706761	-0.437	2.52476	0.125461	0.267785
Slc25a1	0.70638	7.1458	83.2561	3.79106e-09	3.04338e-07
Mrps23	0.70571	-0.0218955	3.76829	0.0643399	0.165261
Klf17	-0.704938	-1.15312	1.28971	0.267571	0.444632
Rpgrip1l	-0.704806	-1.84452	0.642276	0.430931	0.608996
AK144545	-0.70413	1.23011	7.15574	0.0133912	0.0518976
Tmem86a	-0.702842	8.31204	83.4028	6.47822e-09	4.85386e-07
Cacna1a	-0.702462	-1.1518	1.25778	0.27342	0.451166
AF357376	-0.702412	2.59926	12.7224	0.00175146	0.0111399
Mmp9	-0.70222	-0.120147	3.36294	0.0793975	0.192361
Zfp605	-0.702173	-1.37577	0.959399	0.337333	0.517407
D630032N06Rik	0.701804	0.113077	3.74575	0.0650859	0.166496
Tomm5	-0.701716	-0.613758	2.25547	0.146485	0.296162
AK037090	-0.701585	-0.437314	2.63178	0.118109	0.256093
Exosc5	-0.700653	1.66824	10.1101	0.00410983	0.0213952
Kbtbd11	0.700595	5.63666	37.8395	2.10908e-05	0.000345025
Tekt2	-0.700148	-1.26035	1.26069	0.272881	0.450643
Immt	-0.699919	0.452876	4.96657	0.0356976	0.108076
DQ539915	-0.69991	11.8261	96.4081	8.84016e-10	9.51258e-08
Exoc2	0.699744	-1.41634	1.01235	0.324607	0.506542
Ctso	-0.699717	3.85597	22.3245	0.000113753	0.00131056
Gm10345	0.699697	-0.614478	2.30101	0.142652	0.290776
Aldh16a1	-0.699505	-1.1885	0.890393	0.35783	0.536768
5730446D14Rik	-0.699223	-0.545823	2.3509	0.138588	0.286144
AK140192	-0.698384	-0.187729	2.9266	0.100326	0.228763
Ankrd9	0.698332	-0.960659	1.67771	0.207831	0.374879
Pla2g6	0.697901	-0.566737	2.3751	0.136666	0.28388
AK019690	-0.697732	0.499735	4.56334	0.0433121	0.124143
Ccpg1	-0.697483	-1.33505	1.15308	0.293827	0.474089
Lin54	-0.697468	-0.13635	3.42458	0.0768669	0.187986
Tprkb	0.697353	1.24934	7.36047	0.0122807	0.0489824
Cstf2	0.697342	4.17518	30.3209	1.25315e-05	0.000225545
Cln6	0.697076	-0.118129	3.23783	0.0848337	0.202276
Tspyl3	0.696924	3.6961	26.6141	2.97156e-05	0.000458191
Ccdc96	-0.696737	-0.374746	2.4413	0.131569	0.276621
6530418L21Rik	-0.6966	-0.316025	2.62934	0.118271	0.256279
Herc6	-0.696347	3.63856	19.1234	0.000311281	0.00295922
Mthfd1l	0.695894	3.70109	26.9213	2.75938e-05	0.000429901
D18Ertd653e	-0.695816	2.85142	15.1112	0.000733506	0.00564214
Dido1	-0.695223	7.33895	80.7567	5.87557e-09	4.50238e-07
Fam117a	-0.695062	5.58185	61.6331	5.15723e-08	2.78514e-06
2610528J11Rik	0.694987	2.61301	14.7325	0.000817215	0.00610948
5430416N02Rik	-0.69498	2.79263	13.5229	0.00137504	0.00920485
AK031234	-0.694975	-0.170798	2.81722	0.106532	0.238032
1700040I03Rik	-0.694952	0.521058	5.25707	0.0311413	0.097543
Brd8	-0.694725	2.23799	12.673	0.00162906	0.010556
Zfx	-0.693803	-1.15339	1.12577	0.299588	0.480471
Supt4h1	-0.693454	-0.223692	3.15009	0.0889019	0.209467
1700020D05Rik	-0.692659	-1.05358	1.43341	0.243168	0.416042
Cdh24	-0.692286	3.31006	23.0454	7.29168e-05	0.000913944
Aldh1b1	-0.691882	5.24663	45.0841	7.28399e-07	2.30964e-05
1700001P01Rik	-0.691765	-0.416277	2.33398	0.139951	0.287724
BC051628	0.691574	-1.11877	1.27769	0.269754	0.446994
AK159351	-0.69144	0.112113	3.99584	0.0573277	0.151838
Ttyh3	-0.691379	-1.45708	0.978662	0.332624	0.513992
Map3k8	-0.69132	2.76469	15.9911	0.000547168	0.00450334
Trub2	-0.690533	-1.26004	1.23226	0.278217	0.456726
Ccno	0.690452	1.87167	10.602	0.00341909	0.0188059
Spef2	-0.690236	-0.816983	1.77548	0.195505	0.360339
B3gnt2	-0.690001	2.20455	13.1038	0.001405	0.00937437
Zfp935	-0.689641	-0.638211	2.14732	0.156095	0.310318
Tjap1	0.689559	-1.63846	0.813518	0.37625	0.555912
BC096037	0.688895	0.750726	4.69379	0.0412583	0.119681
Eif2d	0.688797	0.695335	5.66978	0.0257445	0.0846386
H2-Q10	-0.688569	0.839534	1.09925	0.341011	0.520407
Map3k13	-0.688121	2.51375	12.8707	0.00153276	0.0100544
Gm996	-0.687965	-0.436298	2.58985	0.120927	0.260472
Tspan5	-0.687778	-1.45743	0.829003	0.371848	0.550373
AK046242	-0.68769	-0.76417	1.90613	0.180408	0.34224
Gm10348	-0.686805	-0.377149	2.4933	0.127723	0.271355
AK162774	-0.6868	-1.45757	0.888258	0.355556	0.534099
AK087850	0.686311	-0.0371818	3.58313	0.0707714	0.176929
Fam132a	-0.685814	0.634416	5.37564	0.0294717	0.0933038
2010109I03Rik	-0.68579	-0.0202461	2.97301	0.0978196	0.224721
AK037159	-0.685612	0.530043	3.83203	0.0636409	0.164007
Mlst8	-0.68538	-0.545076	2.22365	0.149237	0.300286
Dennd1c	0.685206	3.64784	25.4705	3.93201e-05	0.000563347
Herc3	-0.685115	-0.90106	1.5832	0.22068	0.389764
Maf	-0.684944	4.81914	37.8297	2.60023e-06	6.4464e-05
Lims1	0.684903	3.22239	16.4732	0.00054032	0.0044615
Mcoln2	-0.684821	1.14546	7.33983	0.0123879	0.0493255
Art4	-0.684756	-1.25932	1.08034	0.309217	0.490832
AB347565	0.68427	-0.375013	2.00878	0.171158	0.330962
Gpa33	-0.684174	-0.568145	2.27664	0.144688	0.293643
Slc1a4	0.683847	7.4249	90.0487	1.68596e-09	1.56064e-07
Snord7	-0.683749	1.06775	6.88353	0.0150433	0.0567707
Mcm8	0.683504	0.571003	4.72468	0.0400656	0.117559
BC067033	-0.683233	-0.816934	1.6774	0.207873	0.374879
Rnf215	0.683144	-0.900139	1.66376	0.209669	0.377123
Ptp4a3	0.682549	-1.05283	1.49502	0.233583	0.404185
Supt5h	-0.682409	0.672349	4.31866	0.0494204	0.136172
Fbxo36	-0.682088	4.25506	34.9715	4.61427e-06	0.000100589
Zmym5	-0.681846	-0.713585	1.91162	0.179806	0.34129
AK015545	-0.681717	-0.990479	1.36285	0.254775	0.429652
Tgfbrap1	-0.681659	-0.687458	2.03966	0.166423	0.32485
D3Ertd254e	-0.681501	4.24475	34.2155	5.39676e-06	0.000113019
AK080350	-0.681411	4.8103	41.8016	1.22438e-06	3.50838e-05
Calcrl	0.681378	7.18693	7.25036	0.0805342	0.194417
Epb4.1l5	-0.68132	-0.355933	2.07638	0.16396	0.321343
Shank1	-0.681068	1.43215	7.19	0.0132632	0.051579
AK037260	-0.680824	-0.151593	2.93773	0.0997177	0.227839
Tex264	-0.680491	-0.00578529	3.39879	0.0779144	0.189744
Gabpa	-0.680189	-0.902117	1.64058	0.212765	0.380839
2018-09-11	0.680112	8.59098	102.22	5.04731e-10	6.07781e-08
AK144859	0.679972	1.50593	8.77452	0.00689096	0.031568
Snord16a	-0.679966	1.68203	10.011	0.0042668	0.0220535
Tinf2	0.679717	6.07406	66.2639	2.74589e-08	1.64347e-06
Zbtb42	-0.67965	1.77667	9.71857	0.00476937	0.0239942
Cyp51	0.679597	9.09672	93.3741	1.19758e-09	1.16476e-07
Pde4dip	0.679594	5.95172	65.7975	2.92143e-08	1.71804e-06
5830405N20Rik	0.679459	3.03706	18.8946	0.000228397	0.00230332
Stc2	0.679378	4.56795	36.6583	3.27761e-06	7.72797e-05
Lhfp	0.67923	3.44278	19.7058	0.000182535	0.00192328
Atpase6	-0.679224	9.51964	85.2074	2.82602e-09	2.40212e-07
Ptpre	-0.679212	-0.764213	1.84914	0.186811	0.350379
Tars	0.679156	9.87053	88.788	1.9245e-09	1.70827e-07
Mxi1	0.678634	1.21793	7.24674	0.0128845	0.0505532
Cxx1c	-0.67818	5.21649	43.4702	9.33876e-07	2.77828e-05
Gstz1	-0.677915	-0.394323	2.21179	0.150279	0.301697
AK080292	-0.677556	2.86202	17.4069	0.000354323	0.00327603
Gpr153	-0.677421	-0.568226	2.12842	0.157851	0.312887
Mir17	-0.676701	-1.73834	0.685131	0.416167	0.594903
Ddx55	-0.67668	1.36478	7.14565	0.0134487	0.0520008
Gm10516	-0.676222	-0.241953	2.9106	0.101207	0.230201
Trim12	-0.675588	0.862433	5.95699	0.0226051	0.0769508
Chrac1	-0.675179	-0.686844	1.82536	0.189565	0.353727
Grk4	-0.675103	0.811495	5.66142	0.0258428	0.0848542
Wrap53	-0.674563	-0.591998	2.0661	0.163812	0.321118
Zfp11	-0.673885	0.0105377	3.14243	0.0892679	0.210085
Irak1	-0.673704	-1.37537	0.83594	0.370148	0.548578
Plekhg4	-0.673412	-1.45725	0.877809	0.358349	0.537151
Dync2h1	-0.672891	4.35024	33.4798	6.29838e-06	0.000127932
Yars	0.672199	9.30866	90.7712	1.56388e-09	1.47837e-07
1110005A03Rik	-0.67207	1.41213	8.21077	0.00864115	0.0374166
Zfyve19	0.671774	1.20848	7.25163	0.0128578	0.050482
Arsb	-0.6716	7.18522	77.0684	7.11815e-09	5.25548e-07
Cnot1	-0.671435	0.466457	3.87226	0.0610979	0.15928
Dgkq	-0.670347	-0.637872	1.72715	0.201482	0.367536
2410006H16Rik	-0.669952	2.33836	7.93218	0.0125916	0.0497468
Tlr9	-0.669693	-1.18835	1.15284	0.293876	0.474091
AK217941	-0.669683	1.24042	7.29806	0.0126081	0.0497583
Slc7a6os	-0.669503	1.67493	9.31856	0.00556513	0.0269079
Heatr7a	-0.669249	6.63331	64.8368	4.8426e-08	2.67666e-06
Fam172a	0.669075	-0.817627	1.72936	0.201204	0.367161
BC083502	-0.669062	2.71699	13.7061	0.00114627	0.00793364
Snord110	0.669031	-1.54491	0.802614	0.379414	0.55928
Tpi1	0.668798	10.1579	93.4068	1.19362e-09	1.16476e-07
Uso1	-0.668153	0.913069	5.23408	0.0314772	0.0982692
Parp16	0.667989	-0.638087	2.00266	0.170163	0.329794
AK051847	-0.667781	0.691751	4.74024	0.0397672	0.116762
Ralgapb	-0.667222	-0.591551	1.97851	0.172658	0.332654
Lzts1	0.667172	2.75076	16.5298	0.000462849	0.00400832
Dhx34	-0.666999	-1.59087	0.730707	0.4013	0.580958
Coq3	0.666577	5.89952	60.3602	6.17053e-08	3.21727e-06
Slc28a2	-0.665736	-1.50105	0.705458	0.409831	0.589175
Gm12	0.665361	-1.33508	1.06321	0.312999	0.49484
C330046G03Rik	-0.66472	-0.989991	1.45103	0.240376	0.412733
Mogs	0.664674	8.08783	93.4432	1.18922e-09	1.16476e-07
Aars	0.664364	10.8066	82.7326	3.71355e-09	3.005e-07
Trmt2a	-0.664033	-0.0228801	2.85919	0.104099	0.234525
Vti1b	-0.663834	-0.315376	2.00255	0.171627	0.331172
Pcdhgc4	-0.663729	1.29783	6.47031	0.0179993	0.0654193
Cdc25b	0.663645	2.106	9.02923	0.0066731	0.0308212
Ogt	-0.663553	1.02018	4.67675	0.0425306	0.122598
Samsn1	-0.663244	2.23873	12.393	0.00179548	0.0113296
Adamts1	0.662965	6.35115	69.3652	1.83352e-08	1.20429e-06
AK142664	0.662699	-0.990674	1.45326	0.240026	0.412341
Wfikkn1	-0.662468	1.01779	6.39742	0.0185847	0.0668985
Galt	-0.662374	-1.25955	1.08107	0.309056	0.490702
Mustn1	-0.661676	-0.991145	1.44478	0.241361	0.413876
BCL7B	-0.661673	0.895697	5.65938	0.025867	0.0848944
Ovgp1	-0.661505	0.24731	3.6954	0.0667885	0.169442
Rtkn2	-0.661444	-0.457262	2.12015	0.158627	0.314126
Hdhd2	-0.660865	0.774885	5.47878	0.0281002	0.0900328
AK014224	-0.660821	2.31112	12.3662	0.00181236	0.0114002
Pfkl	0.660703	8.99078	94.732	1.04441e-09	1.10044e-07
Nt5e	0.65999	-0.020819	2.088	0.16669	0.325245
1700065D16Rik	-0.659551	-1.08626	1.3201	0.262156	0.438783
mKIAA1673	-0.658824	5.13604	46.313	5.50214e-07	1.83677e-05
Gm4787	-0.658798	-0.661444	1.75406	0.198127	0.363118
Zfp62	-0.658729	-0.0211797	2.79837	0.107646	0.239851
E130306D19Rik	0.658504	3.90451	26.5688	3.00431e-05	0.000462535
Fam120c	-0.65844	5.76069	10.4153	0.0253819	0.0838403
Rpl35a	-0.658427	-1.25984	0.907226	0.350659	0.529786
Dusp1	0.65803	2.24159	12.7094	0.00160869	0.0104512
AF032968	0.657965	3.27319	20.5162	0.000144203	0.00159064
Lage3	0.657934	-1.33524	0.968894	0.335	0.515601
Asap3	-0.657885	-1.59081	0.677671	0.41868	0.597061
BC031353	-0.65779	-1.18782	1.06771	0.311999	0.493644
Hrsp12	-0.657729	5.76971	56.6013	1.0657e-07	4.92216e-06
Snord38a	-0.657039	-0.637368	1.86408	0.185106	0.348085
Tmem57	-0.65679	-0.0699421	3.16418	0.088234	0.208428
Acy1	0.65641	5.04754	42.6116	1.05624e-06	3.08781e-05
AK088944	-0.656407	-0.458064	2.31183	0.141758	0.289791
1600002K03Rik	-0.656406	5.02848	36.6771	3.58576e-06	8.28082e-05
Pcsk4	-0.656289	2.10478	11.634	0.00234785	0.0138314
Ccdc51	0.655854	4.91909	38.6578	2.21292e-06	5.64405e-05
AK139053	-0.655633	-1.26003	1.05457	0.31493	0.496884
Odf1	0.655025	-0.277378	2.68695	0.114517	0.250345
Cenpi	-0.654984	-0.241611	2.16654	0.155035	0.308576
Arid4b	-0.654629	1.70172	9.31324	0.00557666	0.0269379
Letm2	-0.654405	-0.395243	2.11237	0.159361	0.315092
Npm3-ps1	-0.654243	1.65886	8.20252	0.00867014	0.037494
Tex9	-0.65332	-0.038765	3.13721	0.089518	0.210575
Safb	-0.652996	0.757404	4.77691	0.0390739	0.115251
Mzf1	-0.65295	-0.335178	2.54479	0.124045	0.265617
Lmbrd2	-0.652831	0.862789	5.62663	0.0262568	0.0859508
Trappc6b	-0.652483	-1.18859	1.17176	0.290042	0.469709
S100a3	-0.652446	1.73823	4.94903	0.0437165	0.124948
DQ713846	0.652218	0.0131457	2.95404	0.098835	0.226366
Dlgap5	0.652192	2.30615	12.1246	0.00197265	0.0120723
AK017125	-0.652177	0.604085	4.68753	0.0407882	0.118863
Gm2518	0.65175	-0.711147	1.58202	0.220847	0.389923
Pcdhb18	-0.651687	-1.15293	1.04729	0.316571	0.498499
Angptl2	-0.651625	6.69446	66.7113	2.61599e-08	1.59402e-06
Mylk4	0.651558	8.87813	67.9254	7.18534e-08	3.65225e-06
AK020722	-0.651526	1.98997	9.92167	0.00441384	0.0226285
Aldoart1	0.651302	5.62556	57.4141	9.44862e-08	4.48699e-06
Gm129	0.650906	-0.931142	1.00471	0.329365	0.510656
Zc3h8	0.650281	4.47443	34.1737	5.44397e-06	0.000113314
Nfix	0.650146	-0.71149	1.8292	0.189116	0.353262
Plk4	-0.649915	-1.3744	0.867131	0.361236	0.54016
Pcqap	-0.649716	0.153265	3.30022	0.0820711	0.196998
Rad17	0.649619	-0.844873	1.55717	0.224393	0.393982
AK158973	-0.64913	0.183471	3.55082	0.0719674	0.179122
9130019O22Rik	-0.648242	3.83427	25.3643	4.03701e-05	0.000575131
Tst	0.648149	2.05613	10.7839	0.00319678	0.0178255
[truncated: 8,116 more rows]
