# Supplementary figures and images for: miR-34a is a microRNA safeguard for Citrobacter-induced inflammatory colon oncogenesis
Source: eLife journal article supplement (doi:10.7554/elife.39479), 2018-12-13

Figure 1-figure supplement 1

A

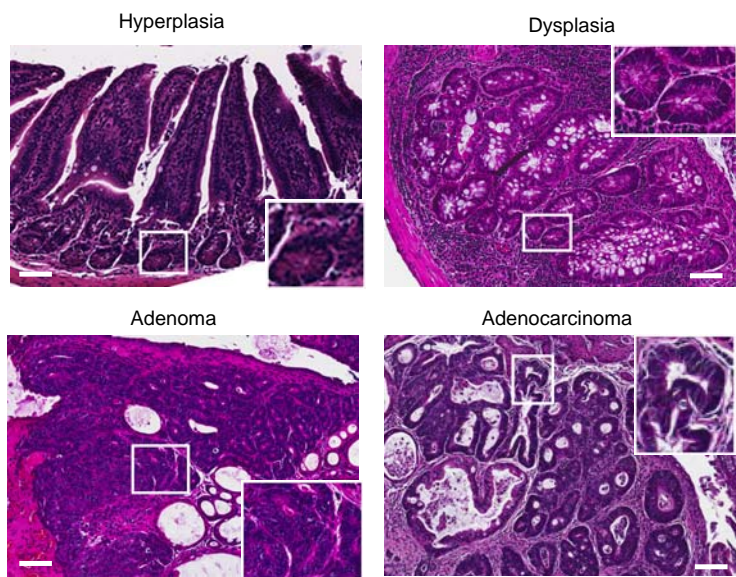

B

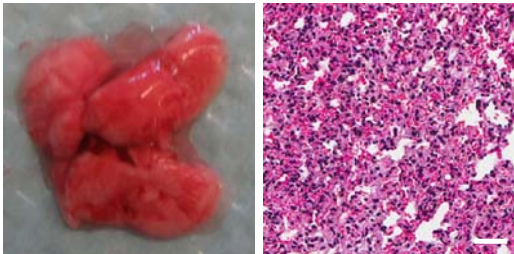

C

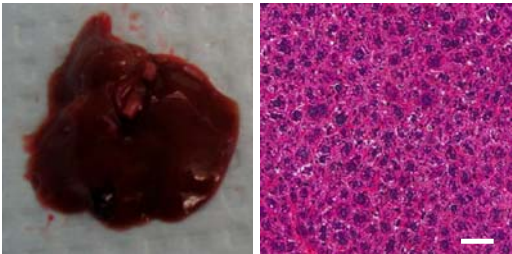

Supplement: supp [file elife_poa_e39479_Figure_1_figure_supplement_1.pdf › elife_poa_e39479_Figure_1_figure_supplement_1.pdf]

Figure 1-figure supplement 2

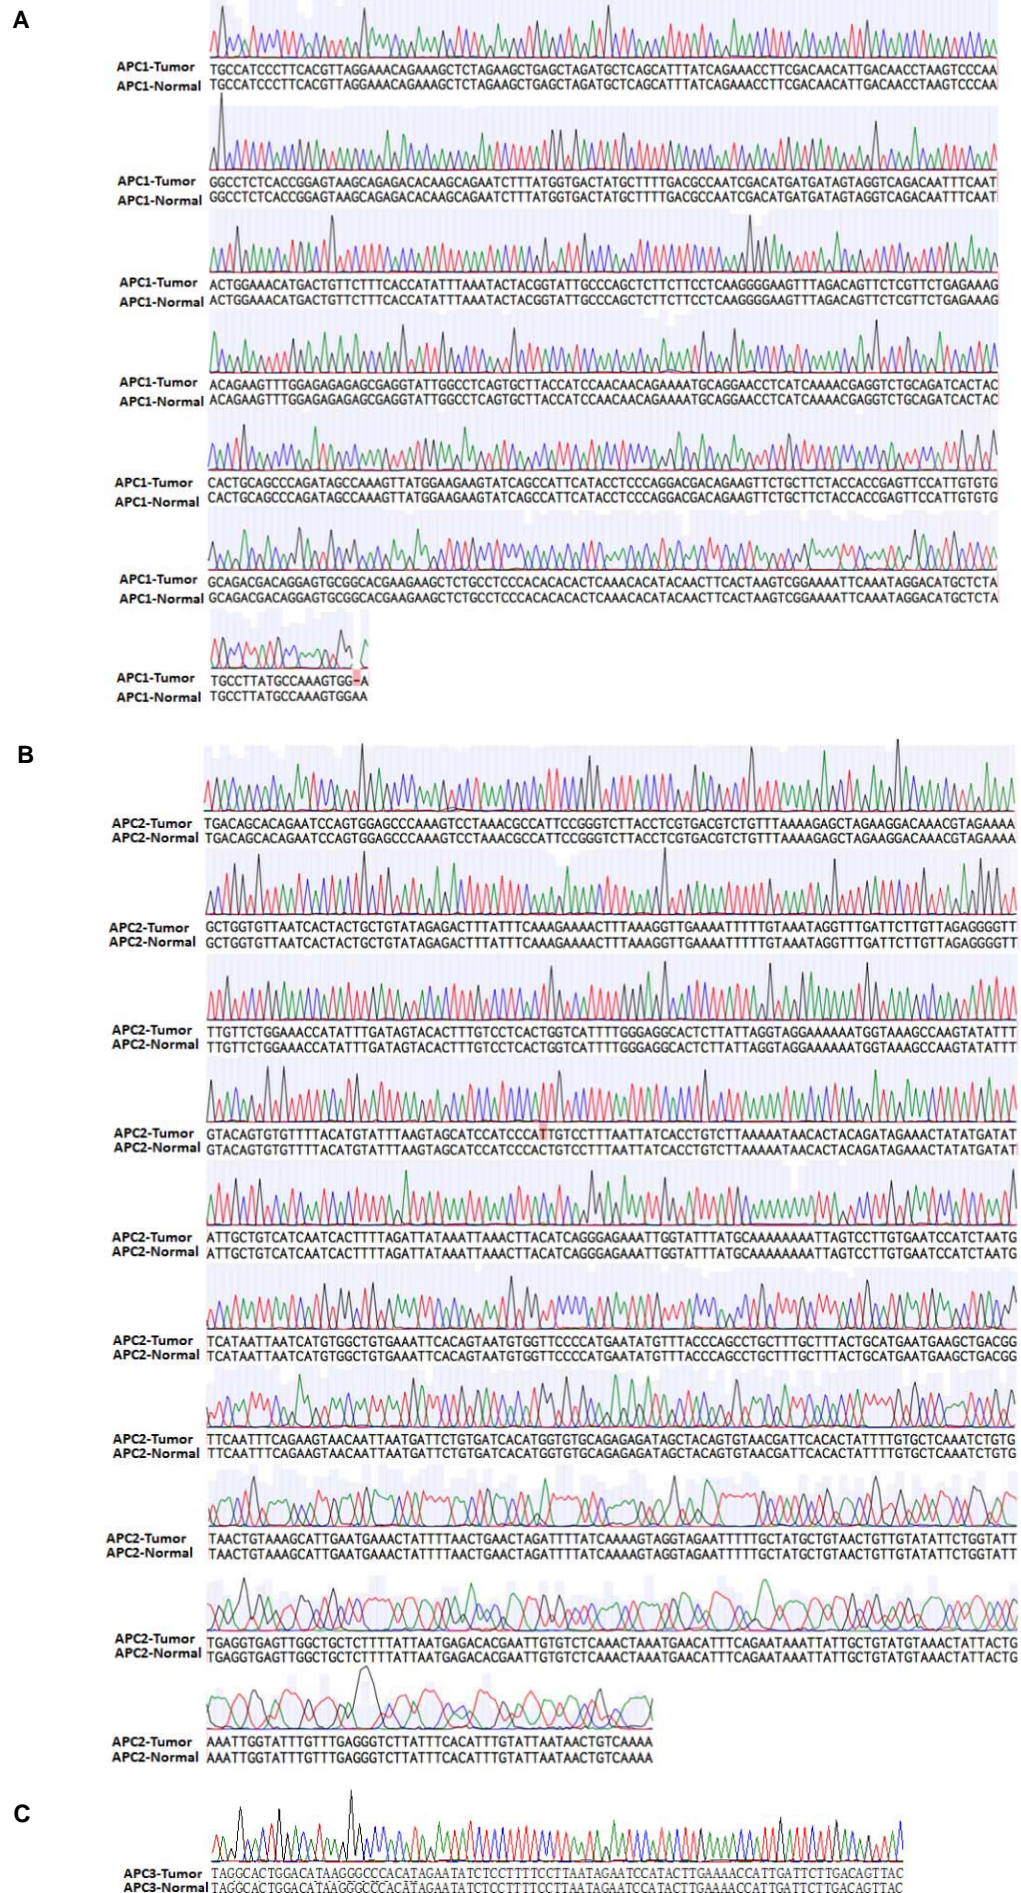

Supplement: supp [file elife_poa_e39479_Figure_1_figure_supplement_2.pdf › elife_poa_e39479_Figure_1_figure_supplement_2.pdf]

Figure 2-figure supplement 1

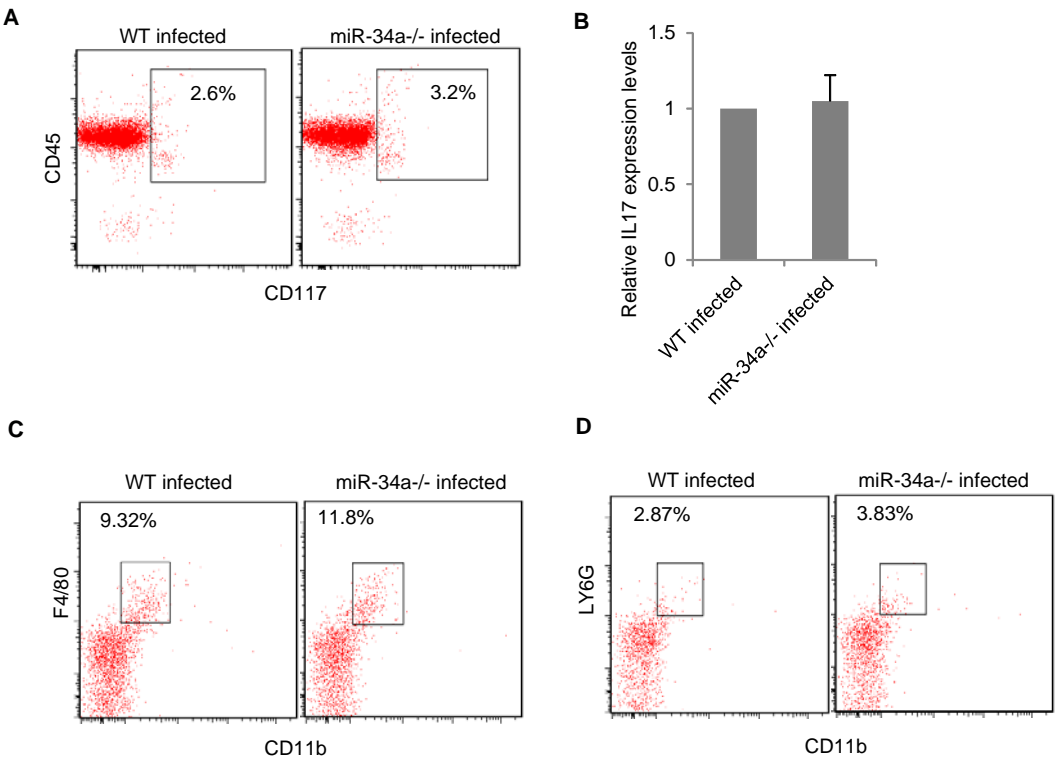

Supplement: supp [file elife_poa_e39479_Figure_2_figure_supplement_1.pdf › elife_poa_e39479_Figure_2_figure_supplement_1.pdf]

Figure 3-figure supplement 1

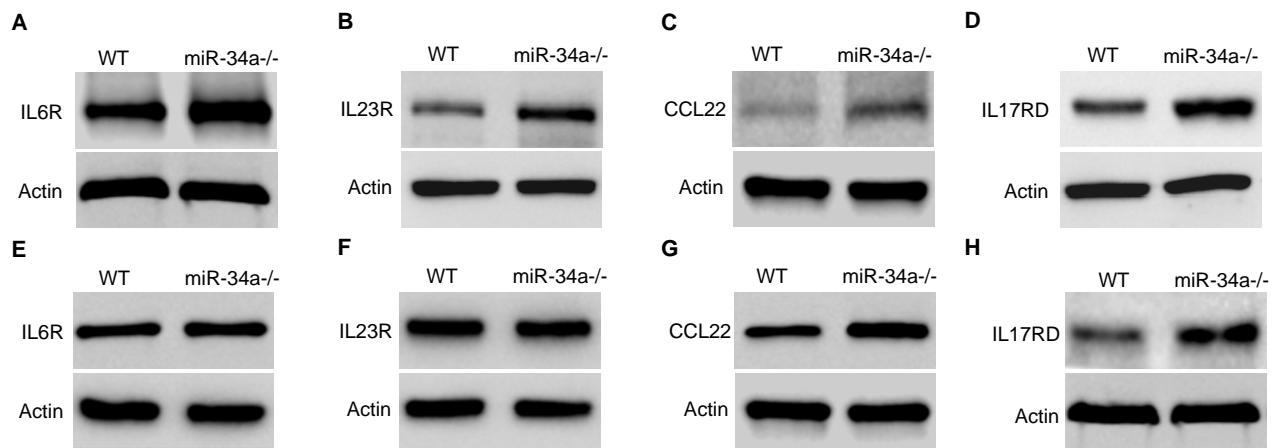

Supplement: supp [file elife_poa_e39479_Figure_3_figure_supplement_1.pdf › elife_poa_e39479_Figure_3_figure_supplement_1.pdf]

Figure 3-figure supplement 2

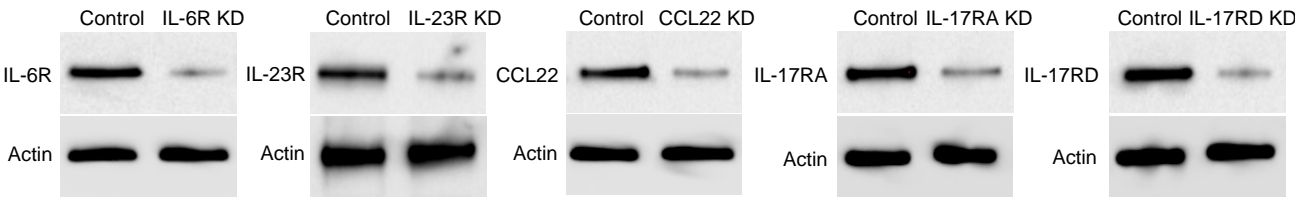

Supplement: supp [file elife_poa_e39479_Figure_3_figure_supplement_2.pdf › elife_poa_e39479_Figure_3_figure_supplement_2.pdf]

Figure 3-figure supplement 3

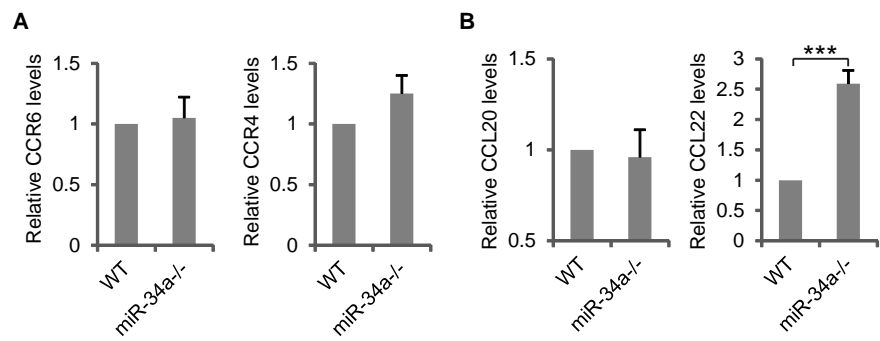

Supplement: supp [file elife_poa_e39479_Figure_3_figure_supplement_3.pdf › elife_poa_e39479_Figure_3_figure_supplement_3.pdf]

[illegible]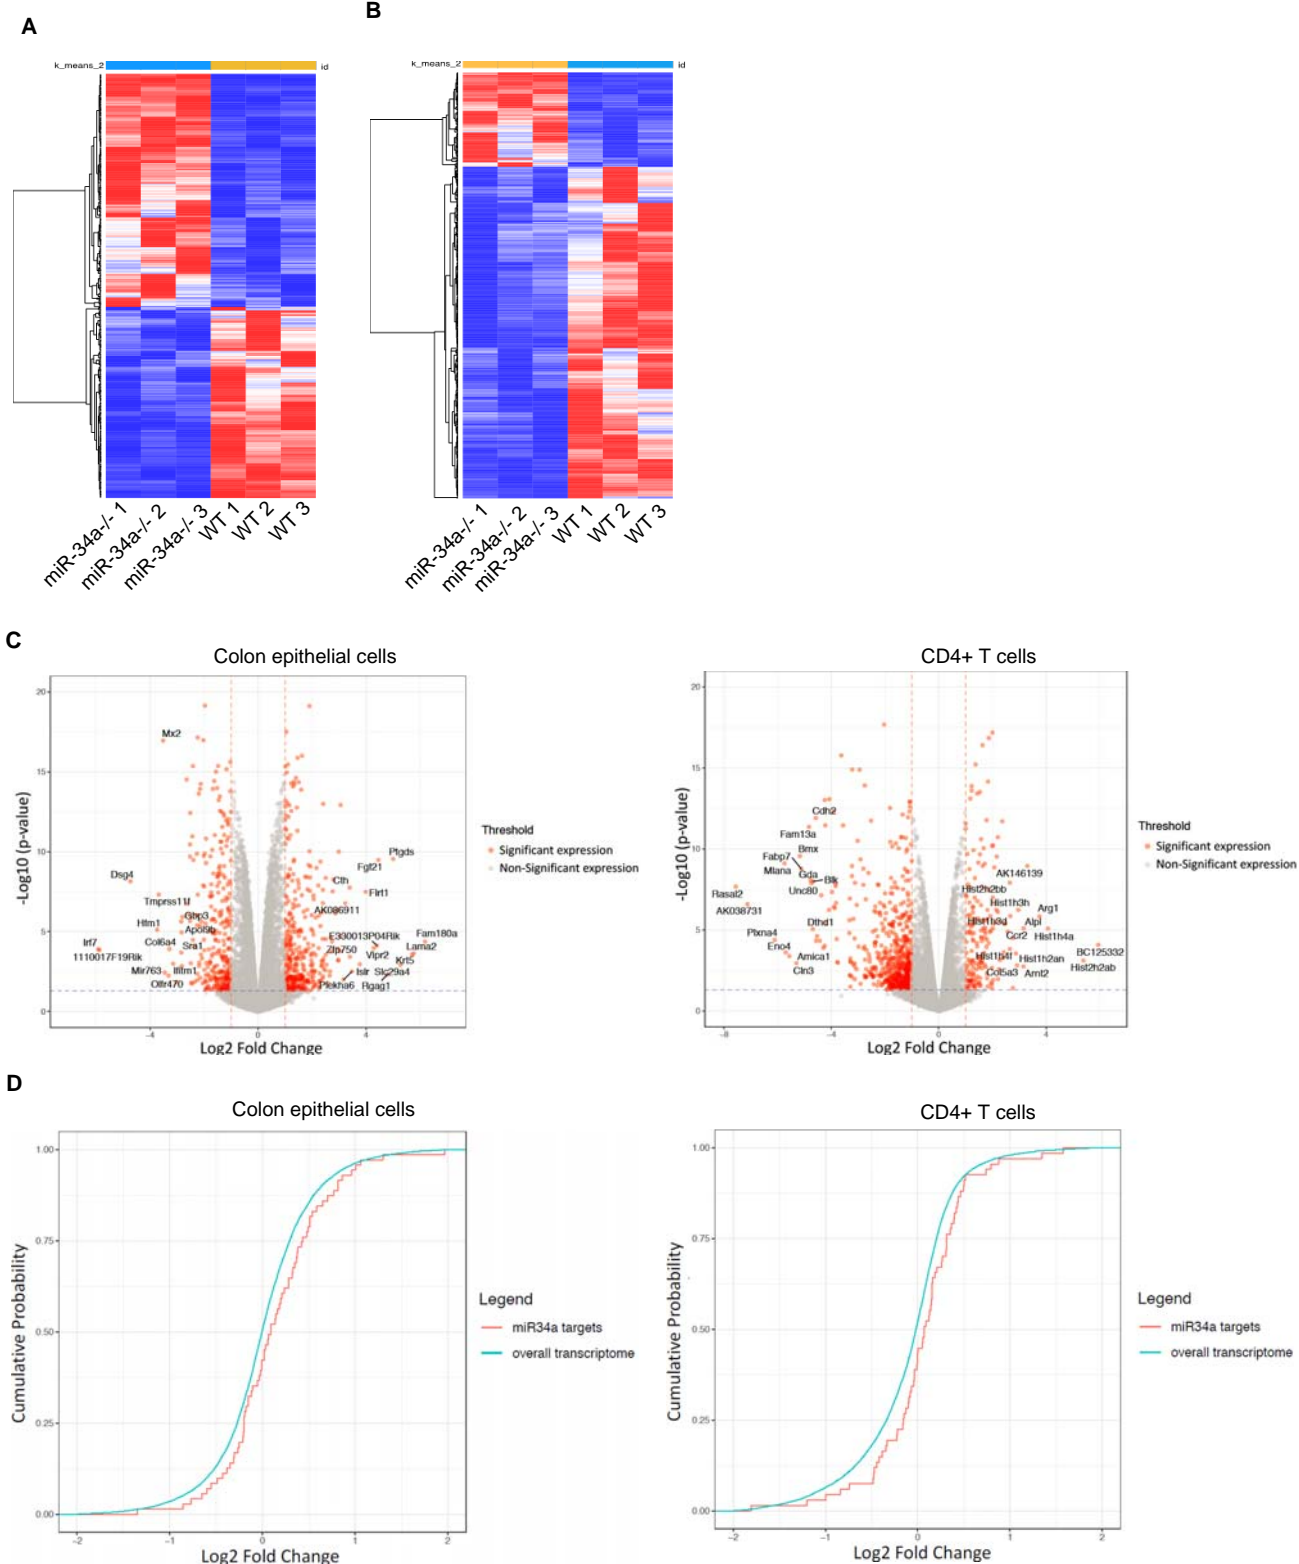

Supplement: supp [file elife_poa_e39479_Figure_3_figure_supplement_4.pdf › elife_poa_e39479_Figure_3_figure_supplement_4.pdf]

Figure 4-figure supplement 1

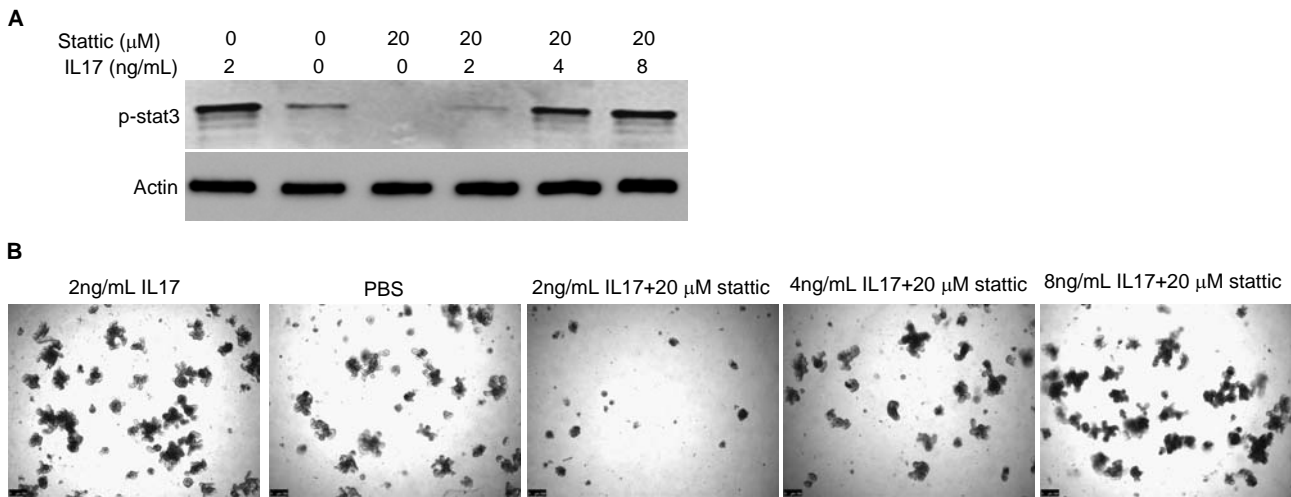

Supplement: supp [file elife_poa_e39479_Figure_4_figure_supplement_1.pdf › elife_poa_e39479_Figure_4_figure_supplement_1.pdf]

Figure 5-figure supplement 1

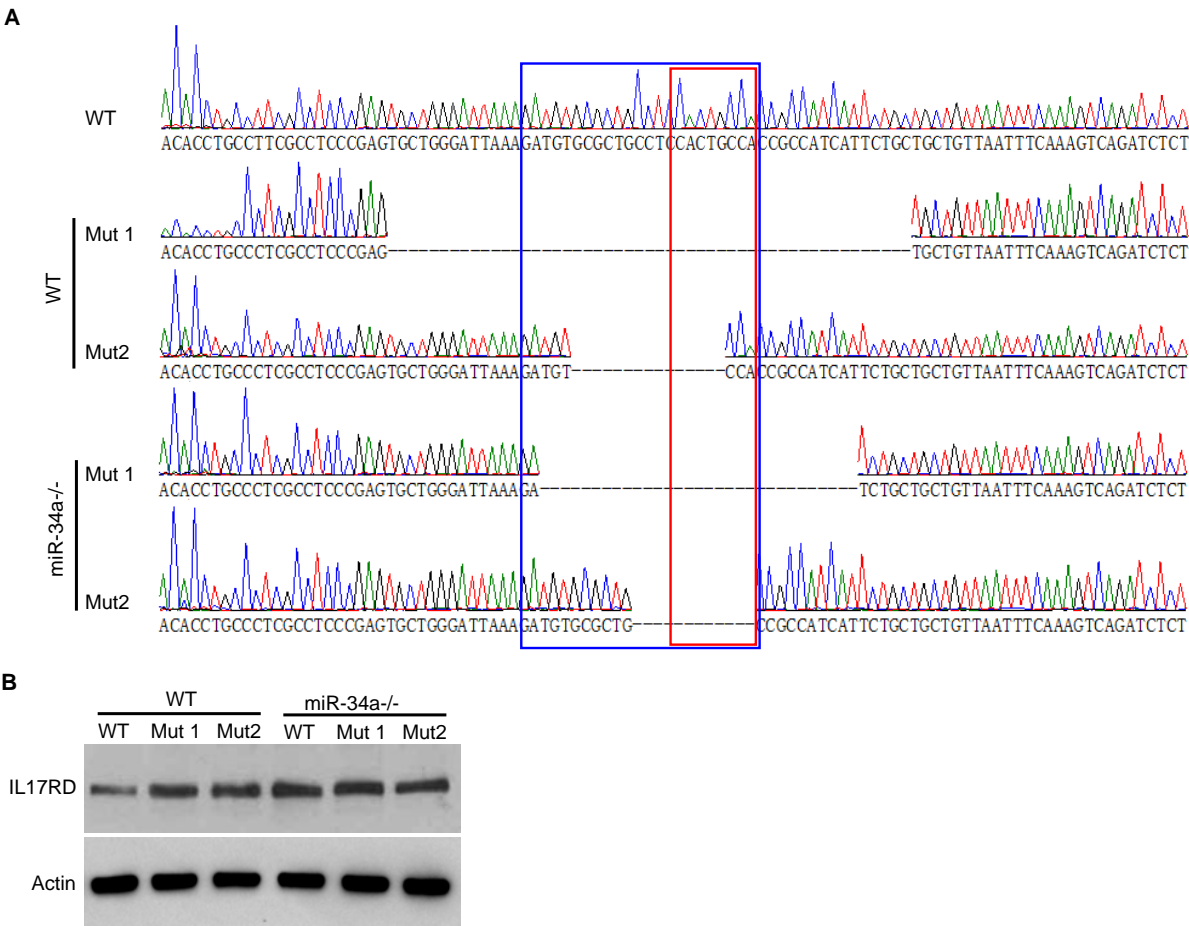

Supplement: supp [file elife_poa_e39479_Figure_5_figure_supplement_1.pdf › elife_poa_e39479_Figure_5_figure_supplement_1.pdf]

Figure 5-figure supplement 2

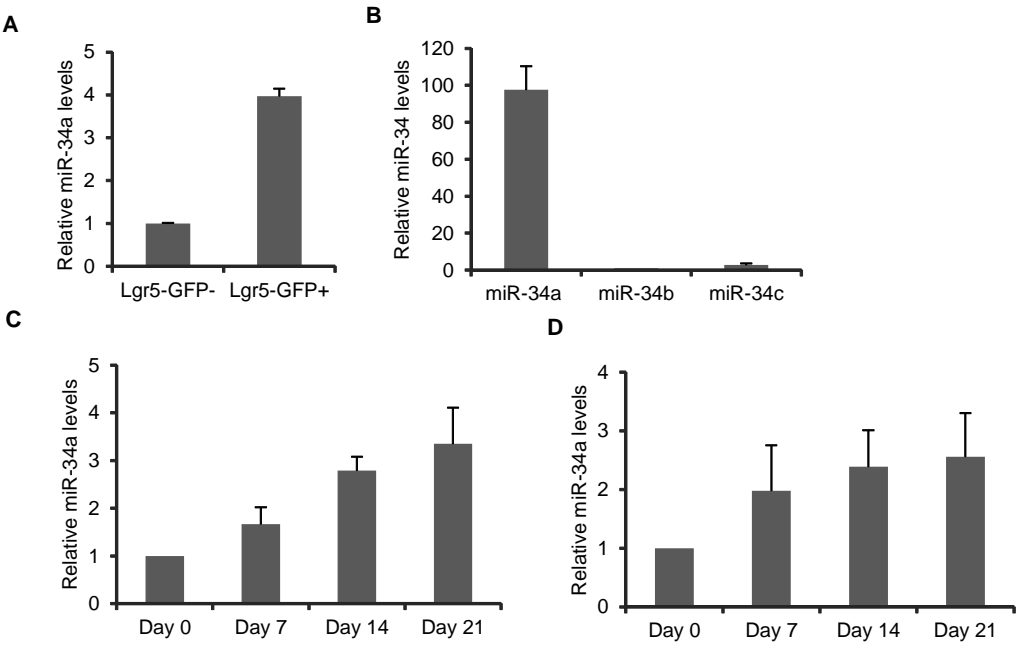

Supplement: supp [file elife_poa_e39479_Figure_5_figure_supplement_2.pdf › elife_poa_e39479_Figure_5_figure_supplement_2.pdf]

Figure 6-figure supplement 1

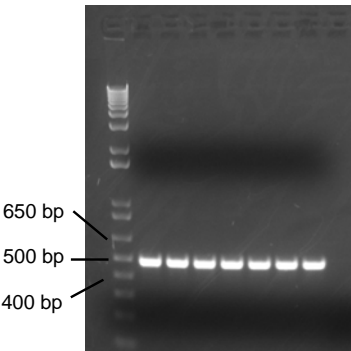

Supplement: supp [file elife_poa_e39479_Figure_6_figure_supplement_1.pdf › elife_poa_e39479_Figure_6_figure_supplement_1.pdf]

Figure 6-figure supplement 2

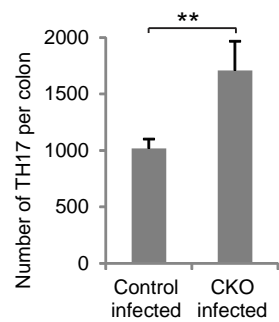

Supplement: supp [file elife_poa_e39479_Figure_6_figure_supplement_2.pdf › elife_poa_e39479_Figure_6_figure_supplement_2.pdf]

Figure 6-figure supplement 3

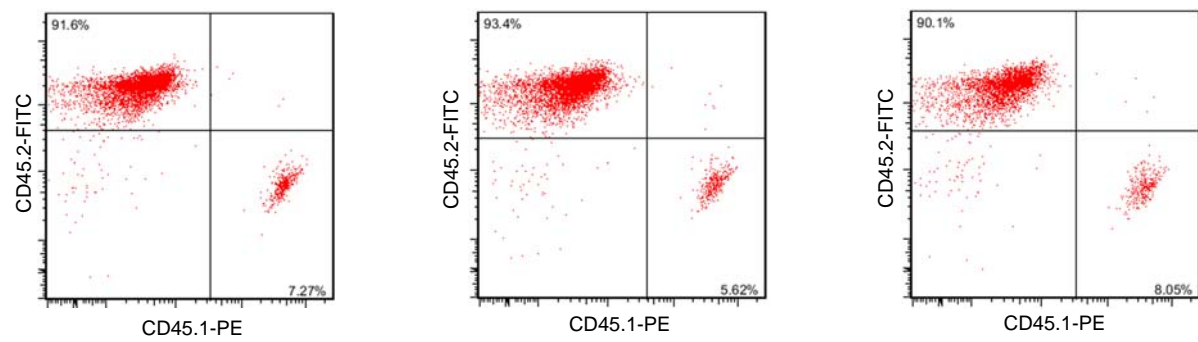

Supplement: supp [file elife_poa_e39479_Figure_6_figure_supplement_3.pdf › elife_poa_e39479_Figure_6_figure_supplement_3.pdf]

Figure 7-figure supplement 1

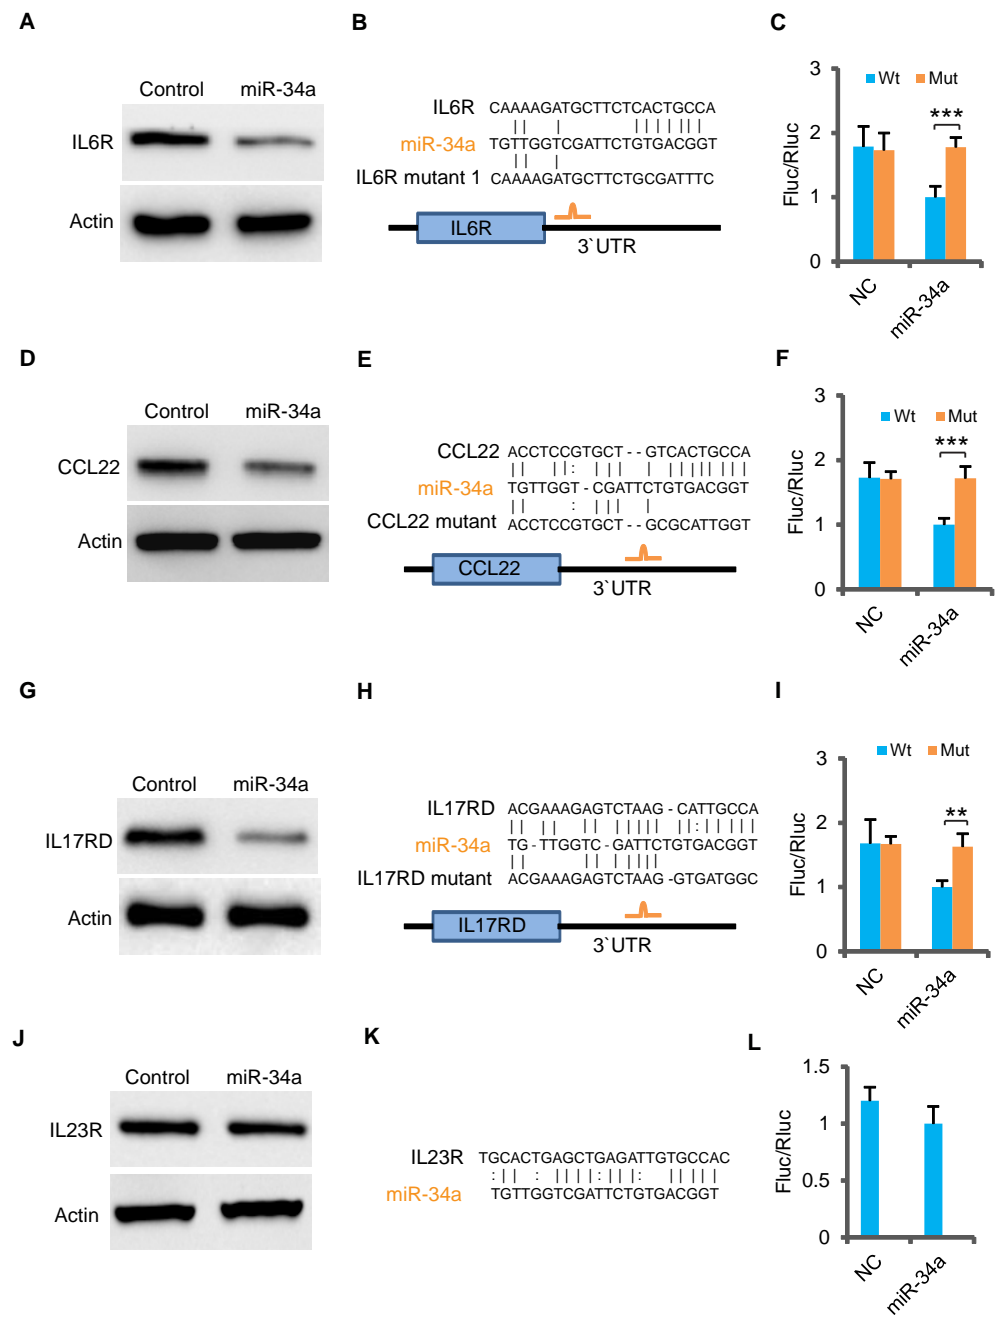

Supplement: supp [file elife_poa_e39479_Figure_7_figure_supplement_1.pdf › elife_poa_e39479_Figure_7_figure_supplement_1.pdf]
